# A general theory of differentiated multicellularity

Felipe A. Veloso<sup>1</sup>✉

<sup>1</sup>Faculty of Biological Sciences, Universidad Andrés Bello, Santiago, Chile

✉Correspondence: [veloso.felipe.a@gmail.com](mailto:veloso.felipe.a@gmail.com)

## Abstract

There is wide scientific consensus on the relevance of changes in the levels of gene expression for the cell differentiation process. Furthermore, research in the field has customarily assumed that such changes regulate this process when they interconnect in space and time by means of complex epigenetic mechanisms. Nevertheless, this assumed regulatory power lacks a clear definition and may even lead to logical inconsistencies. To tackle this problem, I analyzed publicly available high-throughput data of histone H3 post-translational modifications and mRNA abundance for different *Homo sapiens*, *Mus musculus*, and *Drosophila melanogaster* cell samples. Comprising genomic regions adjacent to transcription start sites, this analysis generated for each cell dataset a profile from pairwise partial correlations between histone modifications controlling for the respective mRNA levels. Here I report that these profiles, while explicitly uncorrelated to transcript abundance by construction, associate strongly with cell differentiation states. This association is not to be expected if cell differentiation is, in effect, regulated by epigenetic changes of gene expression. Based on these results, I postulate in this paper a falsifiable theory of differentiated multicellularity. This theory describes how the differentiated multicellular organism—understood as an intrinsic, higher-order, self-sufficient, self-repairing, self-replicating, and self-regulating dynamical constraint—emerges from proliferating undifferentiated cells. If it survives falsification tests consistently this theory would explain in principle (i) the self-regulated gene transcriptional changes during ontogeny and (ii) the emergence of differentiated multicellular lineages throughout evolution.

## 26 Introduction

### 27 The X-files of chromatin

28 Ontogeny, if seen as a motion picture in fast-forward, intuitively appears to be a teleological  
29 process, its *telos*<sup>1</sup> being the multicellular organism in its mature form. The first step for a  
30 scientific explanation of this apparent property was given in 1957 when Conrad Waddington  
31 proposed his epigenetic landscape model. Influenced by earlier developments in dynamical  
32 systems theory [1], Waddington’s model showed ontogeny to be potentially predictable or at least  
33 potentially explainable without any teleological reference [2].

34 In practice however, system predictability has not been achieved yet, and research has rather  
35 focused on “reverse engineering” the ontogenetic process from experimental results. Still, this  
36 strategy has yielded remarkable results such as the induction of pluripotent stem cells (iPSCs) [3].  
37 In terms of explainability, the dynamics of the cell differentiation process have been associated to  
38 changes in chromatin states and concurrent heritable changes in gene expression levels, which  
39 have been defined in turn as epigenetic changes [4, 5]). In some cases these changes can be  
40 generated extrinsically with respect to the developing organism, as clearly observable in eusocial  
41 insects (e.g. a female honeybee larva develops into a worker or a queen depending on the royal  
42 jelly diet it is fed [6]). Nevertheless, most changes of gene expression during cell differentiation  
43 are not only independent from, but are even robust with respect to extrinsic changes. This means  
44 cell differentiation is fundamentally an intrinsically regulated process, for which no falsifiable  
45 theory has emerged from the epigenetic framework since it was first advanced. Moreover, Peter  
46 Fraser has recently referred to this problem as “The X-files of chromatin” [7].

47 This research work was conceived and designed to, following Fraser’s metaphor, declassify  
48 “The X-files of chromatin”. In its initial phase, I conducted a computational analysis of the least  
49 relevant—for the epigenetic landscape—constraints on histone H3 post-translational modification  
50 states. Before outlining this analysis however, I must present here a case for the fundamental  
51 impossibility of explaining the cell differentiation self-regulatory dynamics under the framework  
52 pioneered by Waddington, however complex its underlying mechanisms may be (as also hinted  
53 by Fraser [7]). Only then will I be able to argue that these epigenetically irrelevant constraints on  
54 histone modification states are, in fact, key to a full understanding of differentiated multicellularity  
55 in terms of its self-regulation and evolution.

### 56 The conundrum of self-regulation

57 Avoiding non-explanatory teleological descriptions, modern science regards cell differentiation  
58 fundamentally as a dynamical system, where a fixed rule governs the transition between the  
59 realizable states of a complex network of molecular mechanisms. Ranging from low-order  
60 molecular interactions [8] to chromatin higher-order structural changes [9, 10], these mechanisms  
61 propagate changes of gene expression in different loci as cells proliferate. Both heritable

---

<sup>1</sup>τέλος is the Greek for “end”, “goal”, or “purpose”.

62 and uncorrelated to changes in the DNA sequence, these changes (defined as epigenetic as  
63 mentioned previously) would in turn regulate cell differentiation. Furthermore, and although all  
64 epigenetic mechanisms involved in cell differentiation are far from being completely elucidated,  
65 the hypothesis that cell differentiation is regulated by epigenetic changes of gene expression  
66 is routinely presented to the general public as a well-established scientific fact (as illustrated  
67 in [11]). However, this hypothesis—whether or not we accept it in its strict sense—leads to severe  
68 explanatory limitations and may even entail logical inconsistencies.

69 To assume the aforementioned hypothesis is true in its strict sense is to accept gene self-regulation  
70 as a scientifically tenable and explainable teleological property of cell differentiation (the “intuitive”  
71 *telos* here would be certain future transcriptional states to be timely achieved or maintained).  
72 To explore what this implies let us suppose, for simplicity without loss of generality, that a  
73 researcher modifies experimentally the expression levels of certain *geneA* and then elucidates how  
74 those changes, during differentiation, activate or repress *geneB*, *geneC*, and *geneD*. At this point,  
75 we might regard the finding as evidence that *geneB*, *geneC*, and *geneD* are regulated by *geneA*.  
76 Consequently, we could also hold that *geneA* is a contributing part of the general regulatory  
77 property. However, these assertions overlook that the researcher, not *geneA*, was the true regulator  
78 by purposefully imposing certain transcriptional states (on *geneA*, and by means of *geneA*, also  
79 *geneB*, *geneC*, and *geneD*). Yet, no human regulator is needed during the natural process, which  
80 raises the question of what is the system truly regulating *geneA*, *geneB*, *geneC*, *geneD*, and by  
81 extension, all genes during cell differentiation.

82 Moreover, explaining the regulation of transcriptional states in a gene locus by previous  
83 transcriptional states in other gene loci (in the same cell or any other) is only an explanatory  
84 regress. It takes the question about regulation, i.e. explaining a gene being at certain  
85 transcriptional states (and, importantly, at no other transcriptional states), to some other gene  
86 or genes, back in time. This regress inexorably leads—even in the simplest scenario—to the  
87 unexplained, timely regulation of one key gene (or more key genes, simultaneously) within  
88 undifferentiated cells.

89 On the other hand, to take the epigenetic-changes-regulate hypothesis in a loose sense is to  
90 use “intrinsic regulation” only as a placeholder when referring to a certain class of molecular  
91 mechanisms. If this is the case, we must note that any scientifically tenable mechanism requires  
92 that the changes it comprises are at least dynamically correlated. In this context, an epigenetic  
93 mechanism can be seen metaphorically as toppling dominoes (here the dynamically correlated  
94 events are obvious). But as pointed out previously, this mechanism, however numerous or  
95 intricately connected its correlated changes, says nothing about how the first domino tile (or  
96 any other whose fall is not attributable to the fall of other tiles) was toppled over. To fill this  
97 explanatory gap, it has been proposed that an “epigenator”—defined operationally as a transient  
98 signal which probably originates in the environment of the cell—triggers the epigenetic phenotype  
99 change after being transduced into the intracellular space [12]. Nonetheless, if all “epigenators” in  
100 the system are extrinsic to it, by definition intrinsic regulation cannot be explained. On the other  
101 hand, if there is at least one intrinsic “epigenator” in the system (e.g. a suggested “extracellular  
102 signal”) its critical signaling property is left unexplained.

103 Importantly, these problems are inherent to *any* dynamical systems model intended to account  
104 for the self-regulatory dynamics of cell differentiation. This is because any system able to explain  
105 intrinsic “regulation” must be dynamically uncorrelated to the changes it “regulates”; otherwise  
106 the “regulator” is, fundamentally, just another domino tile that propagates changes regardless  
107 of its relative position. At this point the explanatory dead end becomes evident. Under the  
108 traditional approach in developmental biology no higher-order system within a living organism,  
109 however complex (e.g. displaying interlocked feedback loops or hypercyclic networks), exerts true  
110 intrinsic regulation because its dynamics are ultimately correlated to the lower-order dynamics  
111 it is supposed to regulate. Furthermore, in the epigenetic landscape any “intrinsic higher-order  
112 regulator” can be no more than an epiphenomenon: a causally inefficacious system—whether or  
113 not linear or predictable—resulting from molecular dynamics at the lowest level of scale.

## 114 **Epigenetic information in theory and practice**

115 Regardless of the explanatory limitations inherent to the traditional dynamical systems approach  
116 in developmental biology, either all necessary information for cell differentiation is already  
117 contained in the zygote or it is not. This dichotomy may seem to be trivial but important  
118 implications follow it.

119 If the zygote contains all necessary information [13, 14], the previously discussed explanatory gap  
120 could, in principle, be filled. Epigenetic imprinting, shown able to resolve a few early lineage  
121 commitments in *Caenorhabditis elegans* [15], supports this possibility at first glance. Nevertheless,  
122 a closer look at the complexity of this simple metazoan model organism suggests otherwise:  
123 the hermaphrodite *C. elegans* ontogeny yields 19 different cell types (excluding the germ line)  
124 in a total of 1,090 generated cells. From these two parameters alone, the required information  
125 capacity for the entire process can be estimated to be at least 983 bit (see details in [Appendix](#)).  
126 Further, this is a great underestimation since cell-fate uncertainty remains with respect two more  
127 variables at least, namely space and time. In effect, cell-fate decisions are made in specific regions  
128 within the organism and/or involve specific migration paths, and they are made in specific time  
129 points during differentiation. Therefore, the non-genetic information capacity necessary for the  
130 entire process far exceeds the few bits of information that epigenetic imprinting can account  
131 for.

132 Information not only requires a medium for its storage and transmission but also must have  
133 content which, in this context, resolves the fate of every cell: apoptosis before division, division  
134 without differentiation, or division with differentiation. Here an additional problem appears:  
135 stem cell potency. An entire organism can develop (including extraembryonic tissues) from *any*  
136 totipotent stem cell, and all embryonic tissues can develop from *any* pluripotent stem cell. How is  
137 this possible if cell fate decisions are already specified deterministically in the zygote? The recently  
138 proposed—yet not explanatory—“epigenetic disc” model for cell differentiation, under which the  
139 pluripotent state is only one among many metastable and directly interconvertible states, reflects  
140 the necessity to account for the context-dependent character of cell fate information [16].

141 With remarkable insight, in 1958 David L. Nanney anticipated explanatory pitfalls if the definition  
142 of epigenetics is limited to heritable changes. He further stated that “cellular memory’ is

143 not an absolute attribute” [17]; or, in other words, that more important to development is  
144 the process by which heritable material may manifest different phenotypes than the heritable  
145 material itself. However, Waddington’s epigenetic landscape prevailed and the field reinforced  
146 a “preinformationist” framework: although the zygote is not a complete miniature version  
147 of the mature organism (preformationism), it is indeed a complete blueprint of the mature  
148 organism (allowing for some degree of extrinsic control, as in eusocial insects [6] and stochastic  
149 gene expression [18]). If this is correct, we must also accept that in the mature human  
150 brain—indisputably, one among many products of the developmental process—there is strictly  
151 less non-genetic, non-redundant information than in the human zygote (not surprisingly however,  
152 I failed to find a single research paper with such a proposition).

153 This *reductio ad absurdum* shows that the traditional dynamical systems approach (i.e. the  
154 epigenetic landscape in developmental biology) has forced research to ignore or reject the  
155 necessary *emergence* of not only some, but possibly most information content during ontogeny.  
156 Specifically, if additional information content emerges during brain development, what would  
157 necessarily preclude information content from emerging in proliferating undifferentiated  
158 cells?

## 159 **A proof-of-principle hypothesis**

160 In the previous two subsections I argued that (i) explaining the self-regulatory dynamics of cell  
161 differentiation under the traditional dynamical systems approach is a fundamental impossibility,  
162 (ii) any intrinsic constraints regulating changes in gene expression during cell differentiation must  
163 be dynamically uncorrelated to those changes, and (iii) any theory aiming to explain differentiated  
164 multicellularity must account for emergent developmental information, which is not structurally  
165 but dynamically embodied (that is, dependent on the extracellular context). Consequently, in this  
166 work I designed a computational analysis to search for constraints as defined in (ii) because their  
167 existence is, ultimately, the proof of principle for the theory referred to in (iii).

168 The specific objects of study were observed combinatorial constraints on histone H3  
169 post-translational modifications (also known simply as histone H3 crosstalk). These modifications  
170 were chosen because of their well-established statistical association with transcriptional states [19].  
171 Notably, several high-throughput studies have underscored already the relevance of histone  
172 crosstalk by identifying highly significant pairwise relationships between post-translational  
173 modifications [20, 21, 22, 23].

174 Under these considerations, I defined the working hypothesis as follows: *for any cell population*  
175 *in the same differentiation state and within genomic regions adjacent to transcription start sites,*  
176 *constraints on histone H3 crosstalk explicitly uncorrelated to mRNA levels (i) are statistically*  
177 *significant and (ii) associate with that differentiation state.* Importantly, the null hypothesis  
178 (that is, no significant relationship exists between cell differentiation states and histone H3  
179 crosstalk uncorrelated to mRNA levels) is further supported by the epigenetic landscape  
180 approach: if heritable changes in mRNA levels explain completely cell differentiation states,  
181 an additional non-epigenetic yet differentiation-associated level of constraints on histone H3  
182 crosstalk is superfluous.

183 For the computational analysis I used publicly available tandem datasets of ChIP-seq (chromatin  
184 immunoprecipitation followed by high-throughput sequencing) on histone H3 modifications and  
185 RNA-seq (transcriptome high-throughput sequencing) on mRNA for *Homo sapiens*, *Mus musculus*,  
186 and *Drosophila melanogaster* (see [Materials and Methods](#)). Its basis was to define a numeric  
187 profile *ctalk\_non\_epi*, which represents the strength and sign of pairwise partial correlations  
188 between histone H3 modification states controlling for mRNA levels within genomic regions  
189 adjacent to RefSeq transcription start sites. In other words, *ctalk\_non\_epi* profiles represent  
190 the non-epigenetic component of pairwise histone H3 crosstalk in genomic regions where the  
191 epigenetic component is significant.

192 The hypothesis testing rationale was to apply unsupervised hierarchical clustering on the  
193 *ctalk\_non\_epi* profiles for different cell datasets in all three organisms, using non-parametric  
194 bootstrap resampling to assess cluster significance [24]. If the null hypothesis is true, the obtained  
195 clusters will be statistically insignificant, or else they will not associate with cell differentiation  
196 states.



## 197 **Results**

198 In all analyses performed, *ctalk\_non\_epi* profiles fell into statistically significant clusters that  
199 associate with cell differentiation states in *Homo sapiens*, *Mus musculus*, and *Drosophila melanogaster*.  
200 Moreover, the results in detail suggest that *ctalk\_non\_epi* profiles associate with cell differentiation  
201 states at least as strongly as do mRNA abundance<sup>2</sup> profiles (the relationship between  
202 transcriptional and cell differentiation states is known and well-established [25, 26, 27]).  
203 In summary, for all three organisms analyzed, the null hypothesis had to be consistently rejected,  
204 indicating that the proof of principle described in the Introduction was obtained.

### 205 **The embryonic stem cells *ctalk\_non\_epi* profile differs significantly from** 206 **those of differentiated cell types in *Homo sapiens***

207 Using data for nine different histone H3 modifications (for details see Materials and Methods),  
208 *ctalk\_non\_epi* profiles were computed for six human cell types. From these, all profiles  
209 corresponding to differentiated cell types, namely HSMM (skeletal muscle myoblasts), HUVEC  
210 (umbilical vein endothelial cells), NHEK (epidermal keratinocytes), GM12878 (B-lymphoblastoids),  
211 and NHLF (lung fibroblasts) fell into the largest statistically significant cluster. Such  
212 significance was expressed in the obtained *au* (approximately unbiased) and *bp* (bootstrap  
213 probability) significance scores, which were greater or equal than 95 (**Figure 1A**, cluster #4).  
214 The *ctalk\_non\_epi* profile identified as dissimilar (i.e. excluded from the largest significant cluster)  
215 was the one corresponding to H1-hESC embryonic stem cells.

216 For comparison and positive control, mRNA abundance profiles for the six cell types were  
217 constructed from RNA-seq data (the same values that are controlled for in the computation  
218 of *ctalk\_non\_epi* profiles) and then hierarchically clustered. As expected, the transcriptional  
219 profile corresponding to H1-hESC (embryonic stem cells) was identified as significantly dissimilar,  
220 i.e. resulted excluded from the largest significant cluster (**Figure 1B**, cluster #3), although in this  
221 case it was excluded along with the GM12878 B-lymphoblastoids profile.

### 222 **The *ctalk\_non\_epi* profiles associate with cell differentiation states in** 223 ***Mus musculus***

224 The analysis for mouse comprised five histone H3 modifications in five cell types. As in  
225 *Homo sapiens* the *ctalk\_non\_epi* profiles fell into significant clusters that associate with  
226 cell differentiation states. The five comprised cell type datasets were 8-weeks-adult heart,  
227 8-weeks-adult liver, plus three datasets of E14 embryonic stem cells after zero, four, and six days  
228 of differentiation respectively. All three E14 *ctalk\_non\_epi* profiles fell into a significant cluster  
229 (**Figure 1C**, cluster #2) and within it, the profiles corresponding to latter time points (four and six  
230 days of differentiation) fell into another significant cluster (**Figure 1C**, cluster #1). Additionally, the

---

<sup>2</sup>Represented by  $\log_2$ -transformed FPKM values.

231 liver *ctalk\_non\_epi* profile was found to be more similar to the profiles of the least differentiated  
232 states than the heart profile (Figure 1C, cluster #3).

233 Mouse mRNA abundance profiles also fell into significant clusters that associate with cell  
234 differentiation states as expected (Figure 1D, clusters #1, #2 and #3). As *ctalk\_non\_epi* profiles  
235 did, transcript abundance profiles resolved a significant difference between the earliest time point  
236 (zero days of differentiation) and latter time points (Figure 1D, cluster #1).

### 237 **The *ctalk\_non\_epi* profiles associate with developmental periods and** 238 **time points in *Drosophila melanogaster***

239 In the final analysis, *ctalk\_non\_epi* profiles were computed from data for six histone H3  
240 modifications in nine periods/time points throughout *Drosophila melanogaster* development  
241 (0-4h, 4-8h, 8-12h, 12-16h, 16-20h and 20-24h embryos; L1 and L2 larval stages; pupae). As  
242 observed in human and mouse profiles, fruit fly *ctalk\_non\_epi* profiles fell into clusters that  
243 also associate strongly with the degree of cell differentiation (derivable from the degree of  
244 development). One significant cluster grouped *ctalk\_non\_epi* profiles of earlier developmental  
245 periods (Figure 1E, cluster #5) apart from later development profiles. Two more significant  
246 clusters grouped later time point *ctalk\_non\_epi* profiles (Figure 1E, cluster #3) and separated the  
247 L2 larvae profile (Figure 1E, cluster #7) from all other profiles.

248 General *ctalk\_non\_epi* cluster structure is not entirely consistent with developmental chronology  
249 as the pupae profile (Figure 1E, cluster #7) shows. It must be noted however that, unlike  
250 *Homo sapiens* and *Mus musculus* data where each *ctalk\_non\_epi* profile represented a specific or  
251 almost specific differentiation state, each *Drosophila melanogaster* data set was obtained by the  
252 authors from whole specimens (embryos, larvae and pupae). Especially for later development,  
253 this implies that each *ctalk\_non\_epi* profile has to be computed from more than one partially  
254 differentiated cell type at the same developmental period, thus limiting to a certain extent the  
255 power of the analysis. This caveat in fact highlights the overall *ctalk\_non\_epi* cluster consistence  
256 with developmental chronology, particularly when compared with that obtained from mRNA  
257 levels as will be detailed next.

258 The mRNA abundance profiles in *D. melanogaster* yielded a general cluster structure much less  
259 consistent with developmental chronology than the obtained from *ctalk\_non\_epi* profiles. For  
260 example, the profile for 0-4h embryos fell into the same significant cluster with the profiles  
261 for 16-20h and 20-24h embryos (Figure 1F, cluster #3). Additionally, the profile for 12-16h  
262 embryos fell into the same significant cluster with the profiles for L1 and L2 larvae (Figure 1F,  
263 cluster #5).



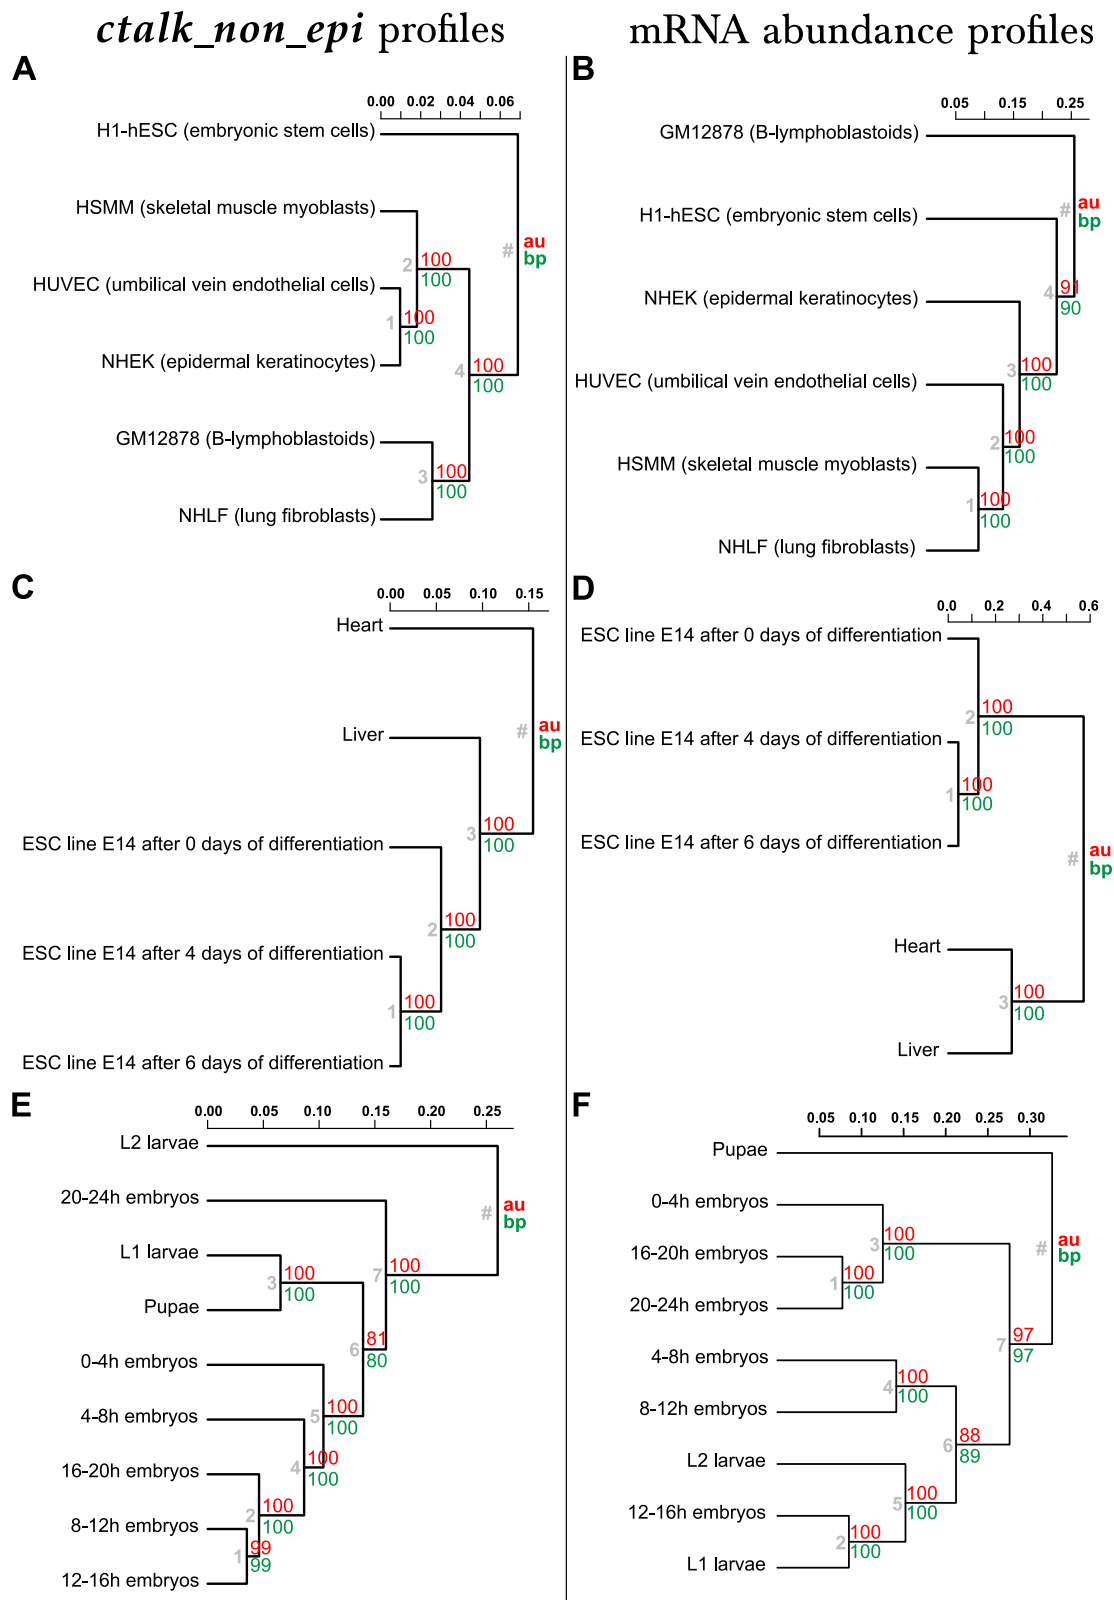

**Figure 1:** Unsupervised hierarchical clustering of *ctalk\_non\_epi* profiles and mRNA abundance profiles for *Homo sapiens* (A, B), *Mus musculus* (C, D), and *Drosophila melanogaster* (E, F). Metric: correlation ( $1 - r$ ). Linkage method: “average” (also known as UPGMA). Significance scores [24]: **au** (approximately unbiased) and **bp** (bootstrap probability). Significant clusters were identified as those for which **au** and **bp**  $\geq 95$ . Cluster numbers are in gray.

## 264 Discussion

### 265 Beyond the obtained proof of principle

266 The most important aspect of the previously presented results is not the clear and statistically  
267 significant relationship between *ctalk\_non\_epi* profiles and cell differentiation states but instead  
268 the nature of the constraints represented by *ctalk\_non\_epi* profiles (provided such relationship  
269 exists). By definition, *ctalk\_non\_epi* profiles represent the strength and sign of pairwise partial  
270 correlations computed from observed histone modification states; the same observed states that  
271 previous research has shown able to predict transcriptional states with high accuracy ( $R \sim 0.9$ ) [19].  
272 It follows directly from these considerations that, for all three analyzed organisms within regions  
273 adjacent to transcription start sites (henceforth TSSs), histone H3 modification states are subject  
274 to an additional type of constraints that are explicitly uncorrelated to mRNA levels and associated  
275 with cell differentiation states. In other words two systems, mutually uncorrelated and yet both  
276 associated to cell differentiation, *simultaneously* constrain histone H3 modification states.

277 Still, any theory of differentiated multicellularity developed on the basis of the critique of the  
278 traditional approach presented in the [introduction](#) and on the obtained proof of principle must  
279 address these seven fundamental questions:

280

281 **Q1** Since the constraints defining the proof of principle are explicitly uncorrelated to mRNA  
282 levels by definition, how do they come to be associated with cell differentiation states?

283 **Q2** If they are indeed necessary for the intrinsic regulation of gene expression during cell  
284 differentiation, how is such regulation exerted?

285 **Q3** Can these constraints be regarded as biologically meaningful information? If so, what is  
286 the content of this information?

287 **Q4** Can they account for the remarkable and characteristic robustness of cell differentiation  
288 with respect to even moderate perturbations?

289 **Q5** How do these constraints relate to the evolution of metazoans? Is this relationship  
290 extendable to the evolution of other differentiated multicellular lineages such as plants?

291 **Q6** Are histone H3 modification states ultimately cause or effect of transcriptional states?  
292 (This last question is a rehash of a very important point raised previously by Peter Fraser  
293 and Wendy Bickmore [28].)

294 **Q7** Why undifferentiated cells start to differentiate in the embryo at certain time point?

295 **Problems with current views on the self-regulation of cell differentiation**  
296 **and the evolution of multicellularity**

297 Since Ernst Haeckel’s “gastraea theory” [29], the explanatory accounts for the evolution of  
298 multicellularity that are regarded as the most solid are fundamentally divorced from those aiming  
299 to explain the dynamics of development such as the epigenetic landscape model. This is because  
300 Haeckel’s hypothesis and the ones built upon it rely on the gradual specialization of same-species  
301 (or even different-species [30]) cell colonies or aggregations [31, 32, 33, 34, 35], whereas ontogeny  
302 and cell differentiation in particular start—in the development of every single multicellular  
303 organism—from a single cell or, in other words, “from the inside out”. Although this divorce does  
304 not necessarily preclude that the “colonial” approach points in the right direction, it is also clear  
305 that a fundamental explanation for how a single cell came to embody this “dynamical reversal”  
306 of development with respect to its evolutionary origin is lacking and will be needed.

307 Notably, some alternative “non-colonial” and “non-epigenetic” hypotheses have been advanced  
308 aiming to explain the dynamics and informational requirements of cell-differentiation (which  
309 in turn could provide some hints on the evolution of multicellularity). One of them is the  
310 “darwinian cell differentiation” hypothesis by J. J. Kupiec, according to which gene expression  
311 instability and stochasticity, in the context of external metabolic substrate gradients, creates  
312 an intrinsic natural-selection-like mechanism able to drive the differentiation process [36].  
313 Another “non-epigenetic” hypothesis, advanced by Andras Paldi, is that cell fate decisions are  
314 the result of the characteristic coupling of gene expression and metabolism: fates are determined  
315 by fluctuations in the nutrient/oxygen ratio, which are driven by the necessity to maintain  
316 the dissipative nature of the metabolic network, which in turn must be redox-neutral at all  
317 times [37].

318 At large, to my knowledge all explanatory accounts of the self-regulation of cell differentiation  
319 and of the evolution of multicellularity suffer at least one of the following problems: (i) failure to  
320 explain how structures or dynamics that supposedly account for the transition to multicellularity  
321 or to cell differentiation have fundamentally analogous counterparts in unicellular lineages or  
322 even prokaryotes, (ii) failure to account, at least in principle, for the information required  
323 in cell fate decisions or in the transition between strictly single-cell-related content to  
324 additional multicellular-individual-related content, (iii) failure to explain the reproducible and  
325 robust self-regulatory dynamics—apart from the propagatory—of gene expression during cell  
326 differentiation and, most importantly, (iv) unfalsifiability: this is why these accounts—including  
327 the epigenetic landscape—are widely regarded as hypotheses, models, or frameworks in spite of  
328 having been presented sometimes as theories by their authors.

329 In terms of overcoming these problems, it must be noted that Kupiec’s hypothesis encompassed a  
330 variable that, I submit, is critical to the solution of the riddle: certain gradients in the extracellular  
331 space—not yet identified, but both fundamentally conceivable and experimentally verifiable—can  
332 be explicitly uncorrelated to gene expression profiles. It is possible that Kupiec did not consider  
333 this possibility because his attempt to explain cell differentiation relied only on random variation  
334 and selection, ruling out with this any explanatory role of emergent systems and properties.

335 In contrast to current hypotheses, the falsifiable theory to be postulated here regards the  
336 multicellular organism as a higher-order system that *emerges* from proliferating undifferentiated  
337 cells and *then* is subject to natural selection (as emerged the very first self-replicating and  
338 self-repairing system—ancestor of all known living organisms—beyond any reasonable doubt).  
339 Importantly, the theoretical development in this work is not based on the substrate-based<sup>3</sup>  
340 concept of irreducible emergence (fundamentally refuted by Jaegwon Kim [38, 39]) but instead  
341 converged (from the strict *explicitly-uncorrelated-dynamics* condition argued in the [introduction](#))  
342 into what can be described as the constraint-based<sup>4</sup> concept of emergence for higher-order  
343 teleological systems, pioneered in a broader perspective by Terrence Deacon in 2011 [40].

---

<sup>3</sup>Understood as molecules and their realizable interactions, which define the state space in a dynamical systems model such as the epigenetic landscape.

<sup>4</sup>Understood as the dynamics explicitly *excluded* from realization in the system.

## 344 Preliminary theoretical definitions and notation

345 Before postulating the theory, I must introduce some new definitions and notation regarding  
346 molecular dynamics and spatial topology. A brief glossary sufficient for the theoretical formulation  
347 is provided below<sup>5</sup>.

348 **Context:**  $X_{(i;t)}$  is the  $i^{\text{th}}$  cell of a given organism or cell population of the eukaryotic species  
349  $X$  at a given instant  $t$ . In the same logic, *the following concepts must be understood in*  
350 *instantaneous terms and will be operationally treated as sets.*

351  $S_E$  **Extracellular space:** The entire space in an organism or cell population that is  
352 not occupied by the cells themselves at a given instant  $t$ . Positions in  $S_E(t)$  will be  
353 specified in spherical coordinates, namely  $r$  (radial distance),  $\theta$  (azimuthal angle),  
354 and  $\phi$  (polar angle).

355  $C_W(X_{(i;t)})$  **Waddington's constraints:** The constraints associating certain subsets of the  
356 spatially-specified molecular nuclear phenotype of  $X_{(i;t)}$  with the instantaneous  
357 transcription rates at the transcription start sites (TSSs), provided these  
358 Waddington's constraints  $C_W(X_{(i;t)})$  are *explicitly uncorrelated* with the genomic  
359 sequence in dynamical terms.

360  $F_W(X_{(i;t)})$  **Waddington's embodyers:** The largest subset of the spatially-specified molecular  
361 nuclear phenotype of  $X_{(i;t)}$  for which the Waddington's constraints  $C_W(X_{(i;t)})$  are  
362 significant (e.g. histone H3 post-translational modifications in the TSS-adjacent  
363 regions).

364  $F_W^{\rightarrow}(X_{(i;t)})$  **Waddington's extracellular propagators:** The largest subset of the entire  
365 spatially-specified and membrane-exchangeable (by facilitated diffusion) molecular  
366 phenotype of  $X_{(i;t)}$  that excludes Waddington's embodyers  $F_W(X_{(i;t)})$  but is capable  
367 of eliciting a change—intracellular signal transduction may be required—in those  
368 Waddington's embodyers  $F_W(X_{(i;t)})$  after a certain time interval  $\Delta t$ .

369  $C_N(X_{(i;t)})$  **Nanney's constraints:** The constraints associating certain subsets of the  
370 spatially-specified molecular nuclear phenotype of  $X_{(i;t)}$  with the Waddington's  
371 embodyers  $F_W(X_{(i;t)})$ , provided these Nanney's constraints  $C_N(X_{(i;t)})$  are *explicitly*  
372 *uncorrelated* with the instantaneous transcription rates at the TSSs in dynamical  
373 terms.

374  $F_N(X_{(i;t)})$  **Nanney's embodyers:** The largest subset of the spatially-specified molecular  
375 nuclear phenotype of  $X_{(i;t)}$  for which the Nanney's constraints  $C_N(X_{(i;t)})$  are  
376 significant (e.g. histone H3 post-translational modifications in the TSS-adjacent  
377 regions, as shown in the [Results](#)).

---

<sup>5</sup>The complete list of formal definitions and notation can be found in the [Appendix](#).

378  $F_N^{\rightarrow}(X_{(i;t)})$  **Nanney's extracellular propagators:** The subset of the entire spatially-specified  
379 and membrane-exchangeable (by facilitated diffusion) molecular phenotype of  
380  $X_{(i;t)}$  that excludes Nanney's embodiens  $F_N(X_{(i;t)})$  but is capable of eliciting a  
381 change—intracellular signal transduction may be required—in those Nanney's  
382 embodiens  $F_N(X_{(i;t)})$  after a certain time interval  $\Delta t$ .



## 383 A general theory of differentiated multicellularity

384 This theory mainly aims to explain how cell differentiation emerges in the ontogeny of extant  
385 multicellular lineages and how differentiated multicellular lineages emerged throughout evolution.  
386 To highlight the similarities of both phenomena at the most fundamental level, the theory will be  
387 postulated in parts described in parallel. Each part will be described in terms of the evolution  
388 of an ancestor eukaryotic species  $U$  towards differentiated multicellularity and in terms of  
389 the ontogenetic process starting from the zygote of a differentiated multicellular species  $D$ .  
390 Importantly, and although its proof of principle was obtained from high-throughput metazoan  
391 data, this theoretical description makes no assumption whatsoever about a specific multicellular  
392 lineage. This is why it is referred to as a general theory here and also in the title.

393  
394 **Part I**            **The unicellular and undifferentiated ancestor.** Let  $U_{(i;t_{U_0})}$  be the  $i^{\text{th}}$  cell  
395 **(Evolution)**    in a population of the species  $U$ , which is the last unicellular eukaryotic  
396 ancestor species of the extant differentiated multicellular species  $D$ . Here  
397 the spatially-specified phenotype  $F(U_{(i;t_{U_0})})$  displays Waddington's embodyers  
398 (i.e.  $F_W(U_{(i;t_{U_0})}) \neq \emptyset$ , e.g. histone post-translational modifications) but cell  
399 differentiation is not possible. Also, significant constraints exist between the  
400 entire spatially-specified phenotype  $F(U_{(i;t_{U_0})})$  and Waddington's propagators  
401  $F_W(U_{(i;t_{U_0})})$  regardless of  $T(U_{(i;t_{U_0})})$  (i.e. significant Nanney's constraints  
402  $C_N(U_{(i;t_{U_0})})$  exist). However, Nanney's propagators (if any) are confined to  
403  $U_{(i;t_{U_0})}$ . In other words, here Nanney's extracellular propagators do not exist  
404 (i.e.  $F_N^{\rightarrow}(U_{(i;t_{U_0})}) = \emptyset$ ; see [Figure 2A](#), top)

405 **Part I**            **The multicellular organism's zygote.** Let  $D_{(1;t_{D_0})}$  be a zygote of the extant  
406 **(Ontogeny)**    differentiated multicellular species  $D$ . Like  $F(U_{(i;t_{D_0})})$ , the spatially-specified  
407 phenotype  $F(D_{(1;t_{D_0})})$  displays Waddington's embodyers (i.e.  $F_W(D_{(1;t_{D_0})}) \neq \emptyset$ ,  
408 e.g. histone post-translational modifications) but cell differentiation is  
409 not observed *yet*. Also, significant constraints exist between the entire  
410 spatially-specified phenotype  $F(D_{(1;t_{D_0})})$  and Waddington's propagators  
411  $F_W(D_{(1;t_{D_0})})$  regardless of  $T(D_{(1;t_{D_0})})$  (i.e. significant Nanney's constraints  
412  $C_N(D_{(1;t_{D_0})})$  exist). But unlike in  $U_{(i;t_{D_0})}$ , Nanney's propagators are *not* confined  
413 to  $D_{(1;t_{D_0})}$ . In other words, here Nanney's extracellular propagators do exist  
414 (i.e.  $F_N^{\rightarrow}(D_{(1;t_{D_0})}) \neq \emptyset$ ; see [Figure 2A](#), bottom).

415  
416 **Part II**            **The necessary novel alleles.** At some instant  $(t_M - \Delta t_M) > t_{U_0}$  during  
417 **(Evolution)**    evolution the genome  $G(U_{(k;t_M - \Delta t_M)})$  of certain  $k^{\text{th}}$  cell of the species  $U$  changes  
418 such that at least one element of its associated phenotype is specifiable in the set  
419 of Nanney's extracellular propagators (i.e.  $F_N^{\rightarrow}(U_{(k;t_M - \Delta t_M)}) \neq \emptyset$ ). As remarked  
420 in the previous subsection, this implies that  $G(U_{(k;t_M - \Delta t_M)})$  accounts also for  
421 all other phenotypic gene products necessary for the facilitated diffusion of the  
422 molecule(s) specified in  $F_N^{\rightarrow}(U_{(k;t_M - \Delta t_M)})$ . Importantly, the novel alleles involved

423 in the change  $G(U_{(i;t_{U_0})}) \rightarrow G(U_{(k;t_M-\Delta t_M)})$  (**Figure 2A to 2B**) are a necessary  
 424 but not sufficient condition for differentiated multicellularity (**Figure 2B**).

425 **Part II**  
 426 **(Ontogeny)**

427 **The already present necessary alleles.** At any instant  $(t_D - \Delta t_D) > t_{D_0}$   
 428 preceding cell differentiation, the genome specified by  $G(D_{(i;t_D-\Delta t_D)})$  (i.e. any  
 429 daughter cell in the embryo) is similar to  $G(U_{(k;t_M-\Delta t_M)})$  (see **Figure 2B**) in  
 430 the sense that both genomes code for Nanney’s extracellular propagators  
 431 (i.e. the sets  $F_N^{\rightarrow}(D_{(i;t_D-\Delta t_D)})$  and  $F_N^{\rightarrow}(U_{(k;t_M-\Delta t_M)})$  are nonempty). Importantly,  
 432 the alleles specified in the zygote’s genome  $G(D_{(1;t_{D_0})})$  and in  $G(D_{(i;t_D-\Delta t_D)})$   
 433 (i.e. the genome of any of its daughter cells) are a necessary but not sufficient  
 condition for cell differentiation.

434 **Part III**  
 435 **(Evolution &**  
 436 **Ontogeny)**

437 **Diffusion flux of Nanney’s extracellular propagators and the geometry**  
 438 **of the extracellular space  $S_E$ .** The existence of Nanney’s extracellular  
 439 propagators  $F_N^{\rightarrow}$  in any cell population  $\{X_{(1;t)}, \dots, X_{(n;t)}\}$  (i.e. cells  
 440 of the species  $X$  at any given instant  $t$ ) implies that a scalar field<sup>6</sup>  
 441  $\Phi_N(X_{(1;t)}, \dots, X_{(n;t)}, r, \theta, \phi) \geq 0$  can represent the concentration of Nanney’s  
 442 extracellular propagators in  $S_E(X_{(1;t)}, \dots, X_{(n;t)})$ . When the number of cells is  
 443 small enough, diffusion flux is fast enough to overtake the spatial constraints  
 444 imposed by the relatively simple geometry of  $S_E(X_{(1;t)}, \dots, X_{(n;t)})$ . Under  
 445 these conditions the associated gradient<sup>7</sup>  $\vec{\nabla} \Phi_N(X_{(1;t)}, \dots, X_{(n;t)}, r, \theta, \phi) =$   
 446  $\left( \frac{\partial \Phi_N(X_{(1;t)}, \dots, X_{(n;t)}, r, \theta, \phi)}{\partial r}, \frac{1}{r} \frac{\partial \Phi_N(X_{(1;t)}, \dots, X_{(n;t)}, r, \theta, \phi)}{\partial \theta}, \frac{1}{r \sin \theta} \frac{\partial \Phi_N(X_{(1;t)}, \dots, X_{(n;t)}, r, \theta, \phi)}{\partial \phi} \right)$   
 447 remains in magnitude<sup>8</sup> under a certain critical value  $V_M$  in  $S_E(X_{(1;t)}, \dots, X_{(n;t)})$   
 448 for the daughter cells of  $U_{(k;t_M-\Delta t_M)}$  and under a critical value  $V_D$  for the  
 449 differentiated multicellular species  $D$ . Importantly, the constraints represented  
 450 in the gradient  $\vec{\nabla} \Phi_N(X_{(1;t)}, \dots, X_{(n;t)}, r, \theta, \phi)$  imply there is free energy  
 available—whether or not there is cell differentiation—which, as will be  
 described later, is in fact partially utilized as work in the generation of new  
 information content.

<sup>6</sup>A scalar field is a function associating a scalar (here concentration of Nanney’s extracellular propagators  $F_N^{\rightarrow}$ ) to every point in space.

<sup>7</sup>The gradient vector field  $\vec{\nabla}$  of a scalar function (in this context, the scalar field  $\Phi_N$ ) is a vector operation that generalizes the concept of derivative represented by the differential operator—denoted by the  $\nabla$  (nabla) symbol and also called “del”—to more than one dimension.

<sup>8</sup>Note that in spherical coordinates the magnitude of the gradient is simply the partial derivative of the scalar field  $\Phi_N(X_{(1;t)}, \dots, X_{(n;t)}, r, \theta, \phi)$  (concentration of Nanney’s extracellular propagators  $F_N^{\rightarrow}$ ) with respect to the radial distance:  $|\vec{\nabla} \Phi_N(X_{(1;t)}, \dots, X_{(n;t)}, r, \theta, \phi)| = \frac{\partial \Phi_N(X_{(1;t)}, \dots, X_{(n;t)}, r, \theta, \phi)}{\partial r}$ .

451 **Part IV**  
452 **(Evolution)**

453  
454  
455  
456  
457  
458  
459  
460  
461  
462  
463  
464  
465  
466  
467

**The emergent transition to differentiated multicellularity.** At some later but relatively close instant  $t_M$ , cell proliferation yields a significantly larger population. Now diffusion flux of Nanney's extracellular propagators is no longer able to overtake the increasing spatial constraints in the extracellular space  $S_E$ . A significant gradient, in magnitude equal or greater—anywhere in  $S_E$ —than the critical value  $V_M$  forms then, i.e.  $\left| \vec{\nabla} \Phi_N(\mathbf{U}_{(1;t_M)}, \dots, \mathbf{U}_{(n;t_M)}, r, \theta, \phi) \right| \geq V_M, (r, \theta, \phi) \in S_E$ . Therefore, Nanney's extracellular propagators  $F_N^{\rightarrow}$  diffuse differentially into each cell, yielding unprecedented differential Nanney's constraints  $\{C_N(\mathbf{U}_{(1;t_M)}), \dots, C_N(\mathbf{U}_{(n;t_M)})\}$  in the cells' nuclei by virtue of no cell or gene product in particular but, importantly, of the constraints imposed by the entire proliferating cell population on the diffusion flux of  $F_N^{\rightarrow}$  in  $S_E$ . These differential Nanney's constraints are in turn defined with respect to Waddington's embodyers  $\{F_W(\mathbf{U}_{(1;t_M)}), \dots, F_W(\mathbf{U}_{(n;t_M)})\}$ , thus they now constrain the instantaneous transcription rates  $\{T(\mathbf{U}_{(1;t_M)}), \dots, T(\mathbf{U}_{(n;t_M)})\}$  in a differential and dynamically uncorrelated manner (**Figure 2C**). This is how multicellular lineages, displaying self-regulated changes of gene expression during ontogeny, evolved.

468 **Part IV**  
469 **(Ontogeny)**

470  
471  
472  
473  
474  
475  
476  
477  
478  
479  
480  
481  
482  
483  
484  
485  
486  
487

**The emergent transition to cell differentiation.** At some later but relatively close instant  $t_D$ , embryonic growth yields certain number of undifferentiated cells. Now diffusion flux of Nanney's extracellular propagators is no longer able to overtake the increasing spatial constraints in the extracellular space  $S_E$ . A significant gradient, in magnitude equal or greater—anywhere in  $S_E$ —than the critical value  $V_D$  forms then, i.e.  $\left| \vec{\nabla} \Phi_N(\mathbf{D}_{(1;t_D)}, \dots, \mathbf{D}_{(n;t_D)}, r, \theta, \phi) \right| \geq V_D, (r, \theta, \phi) \in S_E$  (see question Q7). Therefore, Nanney's extracellular propagators  $F_N^{\rightarrow}$  diffuse differentially into each cell, yielding unprecedented differential Nanney's constraints  $\{C_N(\mathbf{D}_{(1;t_D)}), \dots, C_N(\mathbf{D}_{(n;t_D)})\}$  in the cells' nuclei by virtue of no cell or gene product but, importantly, of the constraints imposed by the entire growing embryo on the diffusion flux of Nanney's extracellular propagators in the extracellular space  $S_E$ . These differential Nanney's constraints are in turn defined with respect to Waddington's embodyers  $\{F_W(\mathbf{D}_{(1;t_D)}), \dots, F_W(\mathbf{D}_{(n;t_D)})\}$ , thus they now constrain the instantaneous transcription rates  $\{T(\mathbf{D}_{(1;t_D)}), \dots, T(\mathbf{D}_{(n;t_D)})\}$  in a differential and dynamically uncorrelated manner (**Figure 2C**). This is how undifferentiated cells start to differentiate, displaying self-regulated changes of gene expression during ontogeny (see question Q1).

488 **Part V**  
489 **(Evolution)**

490  
491  
492  
493

**What was the evolutionary breakthrough?** Since the oldest undisputed differentiated multicellular organisms appear in the fossil record around 2.8 billion years after the first stromatolites [41], the necessary microevolutionary represented by  $G(\mathbf{U}_{(i;t_{U_0})}) \rightarrow G(\mathbf{U}_{(k;t_M - \Delta t_M)})$  can be safely regarded as a highly improbable step. Nevertheless, the major evolutionary breakthrough was not genetic but instead the unprecedented dynamical regime emerging

494 from proliferating eukaryote cells at  $t_M$ , or in more general terms at  
495  $\{t_{M_1}, \dots, t_{M_n}\}$  throughout evolution since extant differentiated multicellular  
496 organisms constitute a paraphyletic group [42, 33]. This novel dynamical regime  
497 emerges as a higher-order constraint<sup>9</sup> from the synergistic coupling of the  
498 lower-order Waddington's constraints  $C_W$  and Nanney's constraints  $C_N$  (able  
499 now to propagate through the extracellular space  $S_E$ ). Although dependent on  
500 the alleles in  $G(U_{(k;t_M-\Delta t_M)})$  to emerge given enough cell proliferation, this  
501 system is not a network of epigenetic mechanisms—however complex—but  
502 instead a particular instantiation of a *teleodynamic system*, proposed by Terrence  
503 Deacon in his *theory of emergence by constraint coupling and preservation*<sup>10</sup> [40],  
504 which is presented to and shaped by natural selection at each instant. In this  
505 context, environmental constraints as oxygen availability [43] and even gravity  
506 (see [Corollary #5](#)) filter out specific emergent multicellular dynamics that are  
507 incompatible with them. In summary, the critical evolutionary novelty was  
508 the unprecedented multicellular *self*, which can be described as an intrinsic,  
509 higher-order, self-sustaining, self-repairing, self-replicating, and self-regulating  
510 dynamical constraint on individual eukaryotic cells.

## 511 Part V 512 (Ontogeny)

**Who is regulating cell differentiation?** Contrary to what could be  
513 expected under the “top-down causation” framework (common to earlier  
514 formulations of causally efficacious emergent properties, and fundamentally  
515 refuted [38, 39] as mentioned previously), the theory hereby postulated does  
516 *not* regard the proliferation-generated extracellular gradient  $\vec{\nabla}\Phi_N$  such that  
517  $\left| \vec{\nabla}\Phi_N(D_{(1;t_D)}, \dots, D_{(n;t_D)}, r, \theta, \phi) \right| \geq V_D, (r, \theta, \phi) \in S_E$  as the fundamental  
518 regulator of the cell differentiation process. While differential Nanney's  
519 constraints  $\{C_N(D_{(1;t_D)}), \dots, C_N(D_{(n;t_D)})\}$  are *regulatory constraints* with respect  
520 to Waddington's embodyers  $\{F_W(D_{(1;t_D)}), \dots, F_W(D_{(n;t_D)})\}$  (as described in  
521 [Part IV-Ontogeny](#)), the reciprocal proposition is also true: since Waddington's  
522 constraints  $\{C_W(D_{(1;t_D)}), \dots, C_W(D_{(n;t_D)})\}$  are dynamically uncorrelated to  
523 Nanney's constraints, they are in turn *regulatory constraints* with respect to  
524 Nanney's extracellular propagators  $\{F_N^{\rightarrow}(D_{(1;t_D)}), \dots, F_N^{\rightarrow}(D_{(n;t_D)})\}$  (e.g. changes  
525 in the expression of the protein pores or carriers necessary for the facilitated  
526 diffusion of Nanney's extracellular propagators). *If and only if the dynamically  
527 uncorrelated Waddington's constraints  $C_W$  and Nanney's constraints  $C_N$ <sup>11</sup> become  
528 synergistically coupled across the extracellular space  $S_E$  true intrinsic regulation on  
529 the cell differentiation process is possible.* This implies in turn that both chromatin  
530 states and transcriptional states are simultaneously cause and effect with respect  
531 to each other (this regime, intuitively describable as “chicken-egg” dynamics, is  
532 the answer this theory provides to question Q6). Ontogenic self-regulation is  
then exerted by the intrinsic higher-order constraint or *teleodynamic system* that

<sup>9</sup>Understood as the states explicitly excluded from being realized in the dynamics of the system.

<sup>10</sup>Although Deacon himself named his theory *emergent dynamics*, I am proposing here this longer but more descriptive name.

<sup>11</sup>Both emerge in turn from genetic (i.e. structurally embodied) constraints.

533 emerges from proliferating cells. In other words, the differentiated multicellular  
534 organism *is* the causally efficacious, higher-order, coupled constraint emerging  
535 from and regulating *ipso facto* Nanney's constraints  $C_N$  and Waddington's  
536 constraints  $C_W$  in what would be otherwise a population or colony—however  
537 symbiotic—of individual eukaryotic cells (see question Q2).  
538

539 **Part VI**  
540 **(Evolution)**

**Unprecedented multicellular dynamics.** Once the necessary  
540 microevolutionary change  $G(U_{(i;t_{D_0})}) \rightarrow G(U_{(k;t_M-\Delta t_M)})$  took place in  
541 the species  $U$  phenomena like gene duplication or alternative splicing<sup>12</sup> made  
542 possible the appearance of a plethora of novel multicellular (*teleodynamic*)  
543 regimes and consequently novel cell types, tissues and organs. Moreover, the  
544 dependence of differentiated multicellularity on one or more coexisting  $\vec{\nabla}\Phi_N$   
545 gradients (i.e. constraints on diffusion flux) in  $S_E$ , which importantly depend  
546 on no cell in particular but on the entire cell population or embryo, yields  
547 at least two important implications in evolutionary terms. First, it explains  
548 in principle the remarkable robustness of differentiated multicellularity with  
549 respect to extrinsic perturbations (see question Q4). Second, since a higher-order  
550 constraint is taking over the regulation of changes in gene expression within  
551 individual cells, it is predictable that said cells lose some cell-intrinsic systems  
552 that were critical in a time when eukaryotic life was only unicellular, even when  
553 compared with their prokaryotic counterparts<sup>13</sup>. In this context a result obtained  
554 over a decade ago acquires relevance. In a genome-wide study comprising  $\sim 90$   
555 bacterial and  $\sim 10$  eukaryote species, it was found that the number of genes  
556 involved in transcriptional change increases as a power law of the total number  
557 of genes [44], with an exponent of  $1.87 \pm 0.13$  for bacteria. Remarkably, the  
558 corresponding exponent for eukaryotes was closer to one (i.e. to linearity):  
559  $1.26 \pm 0.10$ . The previously described loss of lower-order, cell-intrinsic regulatory  
560 systems in differentiated multicellular organisms—by virtue of emergent  $\vec{\nabla}\Phi_N$   
561 gradients in  $S_E$ —is entirely consistent with this observation.

562 **Part VI**  
563 **(Ontogeny)**

**What does ontogeny recapitulate?** This theory holds the hereby proposed  
563 emergent transition, spontaneous from cell proliferation shortly after Nanney's  
564 extracellular propagators  $F_N^{\rightarrow}$  appeared, as key to the evolution of any  
565 multicellular lineage displaying self-regulated changes of gene expression  
566 during cell differentiation. Therefore, it rejects in turn the hypothesis that  
567 metazoans—or, in general, any multicellular lineage displaying self-regulated  
568 cell differentiation—evolved from gradual specialization of single-cell colonies  
569 or aggregations [29, 31, 32, 33, 34, 35]. Importantly however, this is not to  
570 argue that potentially precedent traits (e.g. cell-cell adhesion) were necessarily  
571 unimportant for the later fitness of differentiated multicellular organisms.  
572 Neither is this to reject Haeckel's famous assertion completely: in every extant

<sup>12</sup>In the loci involved in the synthesis and/or facilitated diffusion of Nanney's extracellular propagators  $F_N^{\rightarrow}$ .

<sup>13</sup>T. Deacon generically described this as the offloading of teleodynamic constraints in lower-order systems—at the cost of losing teleodynamic properties—into the higher-order teleodynamic system emerging from them.



573 multicellular lineage this self-sufficient, self-repairing, self-replicating, and  
574 self-regulating system has emerged over and over again from undifferentiated  
575 cells and presented itself to natural selection ever since its evolutionary debut.  
576 Therefore, at least in this single yet most fundamental sense, ontogeny does  
577 recapitulate phylogeny.  
578

579 **Part VII**  
580 **(Evolution &**  
581 **Ontogeny)**

**The role of epigenetic changes.** Contrary to what the epigenetic landscape model entails, under this theory the heritable changes of gene expression do not define let alone explain the intrinsic regulation of cell differentiation. The robustness, heritability, and number of cell divisions which any epigenetic change comprises are instead adaptations of the higher-order dynamical constraint emergent from individual cells (i.e. the multicellular organism). These adaptations have been shaped by natural selection after the emergence of each extant multicellular lineage and are in turn reproduced or replaced by novel adaptations in every successful ontogenetic process.

589 **Part VIII**  
590 **(Evolution &**  
591 **Ontogeny)**

**Novel cell types, tissues and organs evolve and develop.** Further microevolutionary changes in the alleles specified in  $G(U_{(k;t_M-\Delta t_M)})$  or already present in  $G(D_{(1;t_{D_0})})$  (e.g. gene duplication, alternative splicing) imply than one or more than one  $\{\vec{\nabla}\Phi_{N_1}, \dots, \vec{\nabla}\Phi_{N_k}\}$  gradients emerge in  $S_E$  with cell proliferation. A cell type  $T_j$  will develop then in a region  $S_{E_i}$  of the extracellular space  $S_E$  when a relative uniformity of Nanney's extracellular propagators is reached, i.e.  $\left(\left|\vec{\nabla}\Phi_{N_1;T_j}\right|, \dots, \left|\vec{\nabla}\Phi_{N_k;T_j}\right|\right) \leq \left(V_{N_1;T_j}, \dots, V_{N_k;T_j}\right), (r, \theta, \phi) \in S_{E_i}$  (see a two-cell-type and two-gradient depiction in **Figure 2D**). As highlighted earlier, cell differentiation is not *regulated* by these gradients themselves but by the higher-order constraint emergent from their synergistic coupling with Waddington's constraints  $C_W$  within the cells. This constraint synergy can be exemplified as follows: gradients  $\{\vec{\nabla}\Phi_{N_1}, \dots, \vec{\nabla}\Phi_{N_k}\}$  can elicit changes of gene expression in a number of cells, which in turn may promote the dissipation of the gradients (e.g. by generating a surrounding membrane that reduces dramatically the effective  $S_E$  size) or may limit further propagation of those gradients from  $S_E$  into the cells (e.g. by repressing the expression of protein pores or carriers involved in the facilitated diffusion of  $F_N^{\vec{\nabla}}$  in  $S_E$ ). Thus, under this theory cell types, tissues, and organs evolved sequentially as “blobs” of relatively small magnitude  $F_N^{\vec{\nabla}}$  gradients in regions  $\{S_{E_i}, \dots, S_{E_n}\}$  within  $S_E$  (as just described) displaying no particular shape. These “blobs” emerged with no function in particular—apart from not being incompatible with the multicellular organism's survival and reproduction—by virtue of random genetic variation (involved in the embodiment and propagation of Nanney's constraints  $C_N$ ) followed by cell proliferation. Then, the “blobs” were shaped by natural selection from their initially random physiological and structural properties to specialized cell types, tissues, and organs (importantly, such specialization evolves with respect to the



615 emergent intrinsic higher-order constraint postulated here as the multicellular  
616 organism). The result of this evolutionary process is observable in the dynamics  
617 that emerge during the ontogeny of extant multicellular species (**Figure 2E**).

618  
619 **Part IX**  
620 **(Evolution &**  
621 **Ontogeny)**

622 **Emergent information content and multicellular self-repair.** As argued in  
623 the introduction, a significant amount of information content has to *emerge* to  
624 account for robust and reproducible cell fate decisions and for the self-regulated  
625 dynamics of cell differentiation in general. Under this theory, this content  
626 emerges when the significant gradient or gradients  $\{\vec{\nabla}\Phi_{N_1}, \dots, \vec{\nabla}\Phi_{N_k}\}$  form at  
627 some point from proliferating undifferentiated cells, entangling synergistically  
628 Nanney’s constraints  $C_N$  and Waddington’s constraints  $C_W$  across  $S_E$ . Crucially,  
629 this information is *not* about any coding sequence and its relationship with  
630 cell-intrinsic and cell-environment dynamics (i.e. genetic information) *nor* about  
631 any heritable gene expression level/profile and its relationship with cell-intrinsic  
632 and cell-environment dynamics (i.e. epigenetic information). Instead, this  
633 information is *about the multicellular organism as a whole* (understood as the  
634 emergent higher-order intrinsic constraint described previously) and also about  
635 the environmental constraints under which this multicellular organism develops.  
636 For this reason I propose to call this emergent information *hologenic*<sup>14</sup> (see  
637 question Q3). No less importantly, at each instant the multicellular organism is  
638 not only interpreting hologenic information—by constraining its development  
639 into specific trajectories since it emerges—but also actively creating novel  
640 hologenic information (in other words displaying “chicken-egg” dynamics,  
641 similar to those described in **Part V-Ontogeny**). In the multicellular organism,  
642 the subset of the molecular phenotype that conveys hologenic information is  
643 not only the subset involved in the gradients  $\{\vec{\nabla}\Phi_{N_1}, \dots, \vec{\nabla}\Phi_{N_k}\}$  but the entire  
644 subset embodying or propagating Nanney’s constraints  $C_N$ . Additionally, since  
645 the gradients  $\{\vec{\nabla}\Phi_{N_1}, \dots, \vec{\nabla}\Phi_{N_k}\}$  depend on no cell in particular—not even on  
646 a sufficiently small group of cells—but on the whole cell population or embryo,  
cell differentiation will be robust with respect to moderate perturbations such as  
some cell loss (see question Q4).

647 **Part X**  
648 **(Ontogeny)**

649 **Ontogeny ends and cell differentiation “terminates”.** If under this theory  
650 cell differentiation emerges with the proliferation of (at the beginning,  
651 undifferentiated) cells, why should it terminate for any differentiation lineage?  
652 What is this “termination” in fundamental terms? These are no trivial questions.  
653 As an answer to the first, zero net proliferation begs the fundamental  
654 question. To the second, a “fully differentiated” cell state condition fails  
655 to explain the existence of adult stem cells. To address these issues three  
considerations are most important: (i) for any cell or group of cells the molecules  
specifiable as Nanney’s extracellular propagators  $F_N^{\rightarrow}$  at any instant  $t$  may

<sup>14</sup>ὅλος is the ancient Greek for “whole” or “entire”.

not be specifiable as such at some later instant<sup>15</sup>  $t + \Delta t$ , (ii) the emergent *telos* or “end” in this theory is the instantaneous, higher-order intrinsic constraint that emerges from proliferating undifferentiated cells (i.e. the multicellular *self*); *not* a *telos* such as the organism’s mature form, a fully differentiated cell, or certain future transcriptional changes to achieve such states (described as “intuitive” in the [introduction](#)), which are logically inconsistent<sup>16</sup> and unjustifiably homuncular and, (iii) this causally-efficacious, higher-order constraint emerges from the synergistic coupling of lower-order Waddington’s constraints  $C_W$  and Nanney’s constraints  $C_N$  across the extracellular space  $S_E$ . Therefore, under this theory, cell differentiation “terminates” (the quotes will be justified below) in any given region  $S_{E_i}$  of the extracellular space if a stable or metastable equilibrium is reached where (i) the gradients of Nanney’s extracellular propagators dissipate in  $S_{E_i}$  under certain critical values, i.e.  $\left( \left| \vec{\nabla} \Phi_{N_1} \right|, \dots, \left| \vec{\nabla} \Phi_{N_k} \right| \right) < (V_{D_1}, \dots, V_{D_k}), (r, \theta, \phi) \in S_{E_i}$  ([Figure 2F](#), left) and/or (ii) those gradients are unable to constrain Waddington’s embodiments  $F_W$  in the cells’ nuclei because the critical gene products (protein pores/carriers or intracellular transducers) are non-functional or not expressed, i.e. when the cells become “blind” to the gradients ([Figure 2F](#), right). Condition (i) can be reached for example when development significantly changes the morphology—increasing the surface-to-volume ratio—of the cells. This is because such increase removes spatial constraints in  $S_E$  that facilitate the emergence/maintenance of the gradients. It is thus predictable under this theory a significant positive correlation between the degree of differentiation of a cell and its surface-to-volume ratio, once controlling for characteristic length (i.e. “unidimensional size”) and also a negative significant correlation between stem cell potency/regenerative capacity and that ratio. On the other hand, condition (ii) can be reached when the cell differentiation process represses at some point the expression of the protein pores or carriers necessary for the facilitated diffusion of the *current* Nanney’s extracellular propagators  $F_N^{\rightarrow}$ . Importantly, the stability of the equilibrium required in these conditions will depend on the cells’ currently expressed phenotype, e.g. an adult multipotent or pluripotent stem cell—in stark contrast to a fully differentiated neuron—may differentiate if needed [45] and some differentiated cell may dedifferentiate given certain stimuli [46]. These examples underscore that the *telos* of cell differentiation is not a “fully differentiated” state but, as this theory explains, the instantaneous, intrinsic higher-constraint which is the multicellular organism as a whole. Consequently, the “termination” of cell differentiation should be understood rather as an indefinite-as-long-as-functional stop, or even as apoptosis. The multicellular *telos* described will prevail in ontogeny (and did prevail in evolution) as long as an even higher-order *telos* does not emerge from it (e.g. once a central nervous system develops/evolved).

<sup>15</sup>This exemplifies why the [theoretical definitions and notation](#) had to be developed in instantaneous terms.

<sup>16</sup>Since such a *telos* entails the causal power of future events on events preceding them.

696 **Part X**  
697 **(Evolution)**

698 **The evolutionarily-shaped *telos*.** Whereas the causal power of the organism’s  
699 mature form as ontogenetic *telos* is logically untenable and only apparent, the  
700 assumption that the zygote is a complete developmental blueprint containing  
701 all necessary information for the process—as argued in the [introduction](#)—is  
702 also untenable. In contrast, ontogeny is, under this theory, an emergent,  
703 evolutionarily-shaped and truly (instantaneously) teleological process. The reason  
704 why it intuitively appears to be “directed” to and by the organism’s mature  
705 form is that the intrinsic higher-order constraint—the true (instantaneous) *telos*  
706 described previously—and the hologenic information content emerging along  
707 with it are exerting, instant after instant, causal power on the ontogenetic process.  
708 Although the propagation of constraints within this process (e.g. propagated  
709 changes of gene expression) is decomposable into molecular interactions, its  
710 teleological causal power (e.g. self-regulation) is not. This is because its *telos*  
711 is a spontaneous, intrinsic higher-order *constraint* or “thermodynamic zero”  
712 emergent from lower-order constraints; it cannot be reduced or decomposed  
713 into molecular interactions—as the arithmetic zero cannot be divided and for  
714 the same fundamental reason—as T. Deacon first argued [40]. This is also why  
715 hologenic content (and in general any information content, as Deacon has argued  
716 as well) is thermodynamically *absent* or constrained: hologenic content is not  
717 in the molecular substrates conveying that content anymore than the content  
718 of this theory is in integrated circuits, computer displays, paper, or even in the  
719 complex neural interactions within the reader’s brain. As described previously in  
720 less specific terms, what becomes constrained (i.e. thermodynamically “*absent*”)  
721 in the dynamics of the multicellular organism is the content of hologenic  
722 information (see question [Q3](#)); the substrates propagating the critical constraints  
723 for this change can only then be identified as conveying hologenic information.  
724 Natural selection has thus shaped the content of hologenic information by  
725 shaping the genetic constraints it is ultimately emergent from, not any particular  
726 molecules or molecular interactions as media, which should be regarded in this  
727 context as means to the *telos*, as the etymology indirectly implies. Moreover,  
728 the necessary microevolutionary change  $G(U_{(i;t_0)}) \rightarrow G(U_{(k;t_M-\Delta t_M)})$  (described  
729 in [Part II-Evolution](#)) could well have been significantly smaller—in terms of  
730 gene or protein sequence similarity—than the total changes undergone between  
731  $G(U_{(i;t_0)})$  and some of its own eukaryotic unicellular ancestors. In general,  
732 accounting for substantial differences in the phenotype and its properties<sup>17</sup> given  
733 comparatively small genetic changes is bound to be an intractable task if one or  
734 more teleodynamic transitions during evolution is/are involved yet ignored.

733 In hindsight, the [description](#) for the evolution of cell types, tissues and organs  
734 based on initial “blobs” of relative  $F_N^{\rightarrow}$  uniformity in  $S_E$  together with the  
735 predicted positive correlation between degree of cell differentiation and cell  
736 surface-to-volume ratio suggest an additional and more specific evolutionary  
737 implication. That is, the high surface-to-volume ratio morphology needed

<sup>17</sup>When great, these differences usually involve intrinsically teleological dynamics at a variety of levels, e.g. function, regulation, courtship, or planning.

738 for neuron function—and possibly neuron function itself—was only to be  
739 expected in the evolution of multicellularity and is only to be expected in  
740 multicellular-like life (if any) elsewhere in the Universe, provided no rigid  
741 wall (of high relative fitness) impedes the tinkering with substantial increases  
742 of the cells’ surface-to-volume ratio, as observable in plants. In turn this  
743 caveat—now together with the predicted negative correlation between stem cell  
744 potency and surface-to-volume ratio—suggests that if a multicellular lineage  
745 is constrained to always display low cell surface-to-volume ratios, stem cell  
746 potency and regenerative capacity will be higher. All other things being equal,  
747 these multicellular lineages should be characterized then by a comparatively  
748 lower complexity but also by longer lifespan and more robustness to extrinsic  
749 damage (see question [Q5](#)).

752 The synergy in the coupling of Waddington’s constraints  $C_W$  and Nanney’s constraints  $C_N$   
753 across  $S_E$  described in this theory does not preclude that cell differentiation may display phases  
754 dominated by proliferation and others dominated by differentiation itself: whereas significant  
755 gradients of Nanney’s extracellular propagators  $F_N^{\rightarrow}$  in  $S_E$  emerge at some point given enough  
756 cell proliferation, it is also true that the exchange of such propagators between the cells  
757 and  $S_E$  is constrained by the dynamics of facilitated diffusion which, importantly, are saturable.  
758 Any representative simulation of cell differentiation according to this theory, however simple, will  
759 depend on an accurate modeling of the lower-order dynamical constraints it emerges from.

760 Importantly, this theory also encompasses coenocytic (also commonly called “syncytial”) stages of  
761 development, where cell nuclei divide in absence of cytokinesis (observable in some invertebrates  
762 such as *Drosophila*). In such stages, Nanney’s extracellular propagators have to be operationally  
763 redefined as Nanney’s *extranuclear* propagators, while still maintaining their fundamental  
764 defining property.

765 In terms of results indirectly related to this theory, it must be noted that evidence has already been  
766 found for tissue migration across a self-generated chemokine gradient in zebrafish [[47](#), [48](#)]. This  
767 finding demonstrates the feasibility of some of the dynamics proposed here, namely eukaryotic  
768 cells utilizing certain free energy (available in the spontaneous constraints on diffusion in  $S_E$   
769 generated by cell migration/proliferation) as work in their own intrinsic dynamics. These two  
770 linked processes—one spontaneous, the other non-spontaneous—exemplify a work cycle as  
771 proposed by Stuart Kauffman [[49](#)]. What remains to be verified is the synergistic coupling of  
772 two (as in this theory) or more constraint systems, as proposed by T. Deacon, into the intrinsic  
773 higher-order constraint or multicellular organism described here.

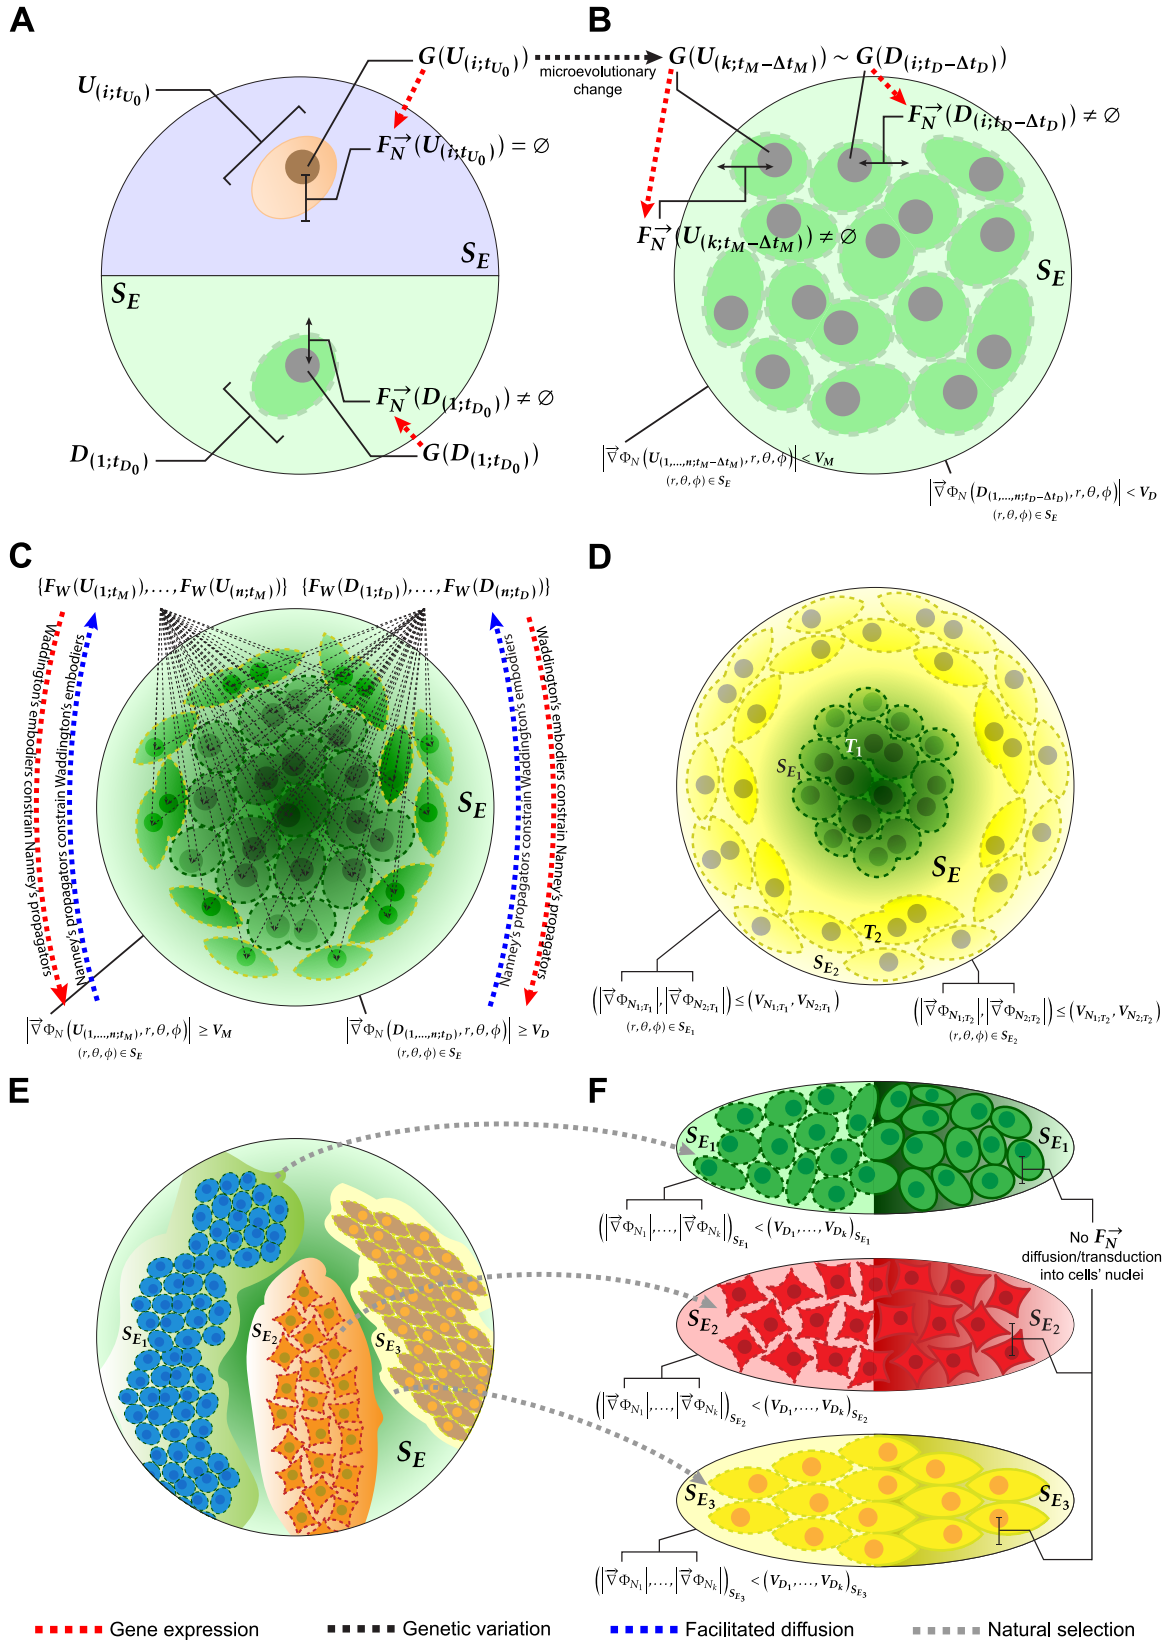

**Figure 2:** Main steps in the theory: 1. The unicellular and undifferentiated ancestor (A, top) and the zygote (A, bottom). 2. The necessary alleles are present and cells proliferate, but still no significant  $\nabla\Phi_N$  gradients form in  $S_E$  (B). 3. The multicellular *telos* (i.e. intrinsic higher-order constraint) emerges when significant  $\nabla\Phi_N$  gradients couple the lower-order  $C_N$  and  $C_W$  constraints synergistically across  $S_E$  (C). 4. Two cell types start to develop in differential regions with relative  $\nabla\Phi_N$  uniformity (D). 5. Cell types/tissues/organs evolve as emergent "blobs" of relatively small  $\nabla\Phi_N$  magnitude and then are shaped by natural selection (E). 6. Cell differentiation stops when  $\nabla\Phi_N$  gradients dissipate (F, left) or when they cannot diffuse/be transduced into the cells' nuclei (F, right).



## 774 Falsifiability

775 Popper's criterion of falsifiability will be met in this paper by providing the three following  
776 experimentally-testable predictions:

- 777 1. Under the proposed theory, the gradient  $\vec{\nabla} \Phi_N(D_{(1;t)}, \dots, D_{(n;t)}, r, \theta, \phi)$  such that  
778  $\left| \vec{\nabla} \Phi_N(D_{(1;t_D)}, \dots, D_{(n;t_D)}, r, \theta, \phi) \right| \geq V_D, (r, \theta, \phi) \in S_E$  is a necessary condition for the  
779 emergence of cell differentiation during ontogeny. It follows directly from this proposition  
780 that *if undifferentiated or differentiating cells are extracted continuously from a developing*  
781 *embryo at the same rate they are proliferating*, then at some instant  $t_D + \Delta t$  the  
782 gradient of Nanney's extracellular propagators in  $S_E$  will dissipate by virtue of the  
783 Second Law of thermodynamics, reaching everywhere values under the critical value,  
784 i.e.  $\left| \vec{\nabla} \Phi_N(D_{(1;t_D+\Delta t)}, \dots, D_{(n;t_D+\Delta t)}, r, \theta, \phi) \right| < V_D, (r, \theta, \phi) \in S_E$ . Thus, as long as cells  
785 are extracted, *the undifferentiated cells will not differentiate or the once differentiating cells*  
786 *will enter an artificially-induced diapause or developmental arrest*. A proper experimental  
787 control will be needed for the effect of the cell extraction technique itself (that is, applying  
788 it to the embryo but extracting no cells).
- 789 2. *There is a significant positive correlation between the cell-wise or cell-type-wise dissimilarity of*  
790 *Nanney's embodyers  $F_N$  in an embryo and developmental time, which will be observable given*  
791 *enough resolution in the experimental technique*. In practical terms, totipotent stem cells can  
792 be taken from an early-stage embryo and divided into subsamples, and embryos from  
793 later stages in the same species can be divided (e.g. by cryosection [50]) into subsamples.  
794 Then, ChIP-seq on histone H3 modifications and RNA-seq on mRNA can be used to obtain  
795 the corresponding *ctalk\_non\_epi* profile—which represent Nanney's constraints  $C_N$  on  
796 histone H3 modifications (adjacent to TSSs) as embodyers—for each subsample. If the  
797 predicted correlation fails to be observed even using single-cell high-throughput sequencing  
798 methods [51], the theory postulated here should be regarded as falsified.
- 799 3. *If any molecular substrate  $M$  (i) is specifiable as a Nanney's extracellular propagator*  
800 *during a certain time interval for certain cells of a differentiated multicellular species*  
801 *(see Corollary #1) and (ii) is also synthesized by an unicellular eukaryote species  $U$  that is*  
802 *unable to differentiate* (e.g. the dinoflagellate *Lingulodinium polyedrum* [52]), then *experiments*  
803 *will fail to specify  $M$  as a Nanney's extracellular propagator for the species  $U$ .*



## 804 Corollaries

805 Described next are some corollaries, hypotheses and predictions (not involving falsifiability) that  
806 can be derived from the theory.

807 **1. Nanney’s extracellular propagators.** The strongest prediction that follows from the  
808 theory is the existence of Nanney’s extracellular propagators, i.e.  $F_N^{\vec{}} \neq \emptyset$  for any  
809 differentiated multicellular species  $D$ . Since these propagators are instantaneously defined,  
810 their identification should be in the form “molecule  $M$  is specifiable as a Nanney’s  
811 extracellular propagator of the species  $D$  in the cell, cell population, or cell type  $T_i$  at  
812 the developmental time point  $t$  (or the differentiation state  $s$ )”. This will be verified if,  
813 for example, an experiment shows that the *ctalk\_non\_epi* profiles in these  $T_i$  cell or cells  
814 vary significantly when exposed to differential concentrations of  $M$  in the extracellular  
815 medium. If this is the case, it is also predictable that  $M$  will be synthesized by the cells *in*  
816 *vivo* at a relatively constant rate (at least as long as  $M$  is specifiable as  $F_N^{\vec{}}$  for them).  
817 Importantly, there is no principle in this theory precluding a molecular substrate  $M$  from  
818 being specifiable as  $F_N^{\vec{}}$  and also as Waddington’s extracellular propagator  $F_W^{\vec{}}$ <sup>18</sup>. Note:  
819 although the existence of Nanney’s extracellular propagators is a very strong and verifiable  
820 prediction, it was not included in the [previous subsection](#) because it is not falsifiable in a  
821 strict epistemological sense.

822 **2. Surface-to-volume ratio and the evolution and development of the extracellular**  
823 **matrix.** It was proposed earlier ([Part X-Evolution](#)) an important relationship between  
824 cell surface-to-volume ratio and the evolution of differentiated multicellularity, in  
825 particular between the neuron’s high surface-to-volume ratio and the evolution of its  
826 function. Importantly, under the predicted relationship between regenerative capacity  
827 and surface-to-volume ratio (see [Part X-Ontogeny](#)) neuron-shaped cells are expected to  
828 be the most difficult to regenerate. This would have been the (developmental) price to  
829 pay for a higher-order, dynamically faster form of multicellular *self* (i.e. higher-order  
830 intrinsic constraint) that neurons—whose interconnectivity is underpinned by their high  
831 surface-to-volume ratio—make possible. On the other hand glial cells (companions of  
832 neurons in the nervous tissue) have a smaller surface-to-volume ratio than neurons so  
833 they would support them by constraining to some extent the diffusion flux of Nanney’s  
834 extracellular propagators  $F_N^{\vec{}}$  in the neurons “effective” extracellular space<sup>19</sup>. Notably, the  
835 glial cells with the smallest surface-to-volume ratio are ependymal cells, which have been  
836 found able to serve as neural stem cells [53]. Since this analysis is based on constraints and  
837 not on specific material embodiments, the logic of the neurons and glial cells example can  
838 be extended to the evolution and development of the extracellular matrix in general. That  
839 is, the extracellular matrix was not only shaped by natural selection making it provide the  
840 cells structural and biochemical support but also developmental support, understood as  
841 fine-tuned differential constraints to the diffusion flux of Nanney’s extracellular propagators

<sup>18</sup>This dual specifiability is not unlikely, since the synergistic coupling of Waddington’s constraints  $C_W$  and Nanney’s constraints  $C_N$  across  $S_E$  requires that at least one type of molecular substrates is simultaneously specifiable as Waddington’s embodiens  $F_W$  and Nanney’s embodiens  $F_N$ .

<sup>19</sup>Understood in this case as the neuroglia plus the neural extracellular matrix.

842  $F_N^{\rightarrow}$  in  $S_E$ . Moreover, I submit that the evolution of this developmental support probably  
843 preceded the evolution of all other types of support, given the critical role of the  $F_N^{\rightarrow}$   
844 gradients in the emergence and preservation of the multicellular *telos*.

845 **3. Natural developmental arrests or diapauses.** The account for natural  
846 diapauses—observable in arthropods [54] and some species of killifish  
847 (Cyprinodontiformes) [55]—in this theory follows directly from the description  
848 in [Part X-Ontogeny](#). That is, natural diapauses are a metastable equilibrium state  
849 characterized by (i) the dissipation of Nanney’s extracellular propagators  $F_N^{\rightarrow}$  in  $S_E$   
850 under certain critical values (e.g. if some factor inhibits cell proliferation) or (ii) the  
851 inability of these gradients to constrain Waddington’s embodyers  $F_W$  in the cells’ nuclei  
852 because the critical gene products (protein pores/carriers or intracellular transducers) are  
853 non-functional or not expressed. For example, if in some organism the function of the  
854 protein pores/carriers critical for the facilitated diffusion of the current  $F_N^{\rightarrow}$  is temperature  
855 dependent, then at that time development will enter a diapause given certain thermal  
856 conditions and resume when those conditions are lost.

857 **4.  $F_N^{\rightarrow}$  gradients and tissue regeneration.** Whereas the scope of the theory  
858 is the dynamics of cell differentiation and the evolution of differentiated  
859 multicellularity, it may provide some hints about other developmental processes  
860 such as tissue regeneration after extrinsic damage. For instance, I hypothesize  
861 that an important constraint driving the regenerative response to wounds (e.g.  
862 a cut in the skin) is the gradient  $\left| \vec{\nabla} \Phi_N(D_{(1;t_{\text{wound}})}, \dots, D_{(n;t_{\text{wound}})}, r, \theta, \phi) \right| \gg$   
863  $\left| \vec{\nabla} \Phi_N(D_{(1;t_{\text{wound}}-\Delta t)}, \dots, D_{(n;t_{\text{wound}}-\Delta t)}, r, \theta, \phi) \right|$ ,  $(r, \theta, \phi) \in S_E$  generated by the wound  
864 itself. This is because a cut creates an immediate, significant gradient at the wound  
865 edges (evidence has been already found for extracellular  $H_2O_2$  gradients mediating  
866 wound detection in zebrafish [56]). If relevant variables (such as  $F_N^{\rightarrow}$  diffusivity in the  
867 extracellular space  $S_E$ , see [Corollary #2](#)) prevent this gradient from dissipating quickly, it  
868 should contribute to a developmental regenerative response as it dissipates gradually. If  
869 different tissues of the same multicellular individual are compared, a significant negative  
870 correlation should be observable between the regenerative capacity after injury in a tissue  
871 and the average cell surface-to-volume ratio in that tissue, once controlling for average cell  
872 characteristic length.

873 **5. Effects of microgravity on development.** In the last few decades a number of abnormal  
874 effects of microgravity on development-related phenomena—including mammal tissue  
875 culture [57], plant growth [58], human gene expression [59], cytoskeleton organization and  
876 general embryo development ([60] and references therein)—have been described. A general  
877 explanation proposed for these effects is that microgravity introduces a significant degree of  
878 mechanical perturbation on critical structures for cells and tissues which as a whole would  
879 be the “gravity sensors” [61]. Without dismissing these structural perturbations as relevant,  
880 I suggest that a key perturbation on development elicitable by microgravity is a significant  
881 alteration—with respect to standard gravity—of the instantaneous  $F_N^{\rightarrow}$  distribution in  
882 the extracellular space  $S_E$ . This could be explained in turn by changes in the diffusion  
883 dynamics (as evidence for changes in the diffusion of miscible fluids suggest [62]) and/or a

884 significant density difference between the extracellular space  $S_E$  and the cells.

885 6. **Why plant seeds need water.** It is a well-known fact that plant seeds only need certain  
886 initial water intake to be released from dormancy and begin to germinate with no further  
887 extrinsic support. Whereas this specific requirement of water has been associated to embryo  
888 expansion and metabolic activation of the seeds [63, 64], I submit that it is also associated  
889 to the fundamental need for a medium in  $S_E$  where the critical  $F_N \vec{\nabla}$  gradients can emerge.  
890 This is because such gradients are in turn required for the intrinsic regulation of the  
891 asymmetric divisions already shown critical for cell differentiation in plants [65].

## 892 **Concluding remarks**

893 The analysis conducted to search for the theoretical proof of principle in this work encompassed  
894 two relevant simplifications or approximations: gene expression levels were represented  
895 theoretically by instantaneous transcription rates, which in turn were approximated by mRNA  
896 abundance in the analysis. These steps were justified since (i) the correlation between gene  
897 expression and mRNA abundance has been clearly established as positive and significant  
898 in spite of the limitations of the techniques available [66, 67], (ii) if gene expression can be  
899 accurately expressed as a linear transformation of mRNA abundance as the control variable, the  
900 *ctalk\_non\_epi* profiles will remain unchanged (see details in [Materials and Methods](#)) and, (iii) the  
901 association between *ctalk\_non\_epi* profiles and cell differentiation states was robust with respect  
902 to these simplifications and approximations as shown in the [Results](#).

903 If the theory advanced here is ever tested and resists falsification attempts consistently,  
904 further research will be needed to identify the cell-and-instant-specific Nanney's extracellular  
905 propagators  $F_N^{\rightarrow}$  at least for each multicellular model organism, and also to identify the  
906 implications (if any) of this theory on other developmental processes such as aging or diseases  
907 such as cancer. Also, more theoretical development will be needed to quantify the capacity and  
908 classify the content of hologenic information that emerges along with cell differentiation.

909 On the other hand, I wish to underscore that the critique of the epigenetic landscape approach  
910 presented in the [introduction](#) (in terms of its supposed ability to explain the self-regulatory  
911 dynamics of cell differentiation) is completely independent from a potential falsification of  
912 the theory. Even that being the case, I argue that if future research keeps on elucidating the  
913 mechanisms propagating changes of gene expression to an arbitrarily high level of detail—while  
914 failing to recognize that the constraints that truly regulate changes<sup>20</sup> must be dynamically  
915 uncorrelated yet coupled to the constraints that propagate those changes—advances in the  
916 fundamental understanding of the evolution and self-regulatory dynamics of differentiated  
917 multicellularity will not be significant.

918 What underpins this view is that scientifically tenable (i.e. instantaneous) teleological dynamics  
919 in nature—unless we are still willing to talk about intrinsically teleological concepts like  
920 function, regulation, agency, courtship or planning in all fields of biology while holding  
921 they are fundamentally meaningless—must be dynamically uncorrelated to the lower-order  
922 dynamics they emerge from. Furthermore, the only way such requisite can be fulfilled is that an  
923 intrinsic higher-order constraint emerges from the synergistic coupling of lower-order constraints,  
924 as Terrence Deacon first proposed. Whereas these thermodynamically spontaneous, intrinsic  
925 constraints are dependent on molecular substrates embodying, propagating, and coupling them  
926 at any instant, these substrates can be added, replaced or even dispensed with at any instant  
927 as long as the *telos* is preserved. For all these reasons, the differentiated multicellular organism  
928 described in this theory (and any living system in general) is no mechanism or machine of  
929 any type (e.g. autopoietic [68])—interconnecting in this case a eukaryotic cell population—for  
930 mechanisms and machines fundamentally entail an *explicit correlation* between the dynamics  
931 within them.

---

<sup>20</sup>Whatever those constraints are if not the ones described in this theory.

932 Thus, the emergence of differentiated multicellularity throughout evolution and in every successful  
933 ontogenetic process has been—and still is—the emergence of unprecedented, constraint-based,  
934 thermodynamic *selves* in the natural world; *selves* which no machine or mechanism could  
935 ever be.

## 936 **Materials and Methods**

### 937 **Data collection**

938 The genomic coordinates of all annotated RefSeq TSSs for the hg19 (*Homo sapiens*), mm9  
939 (*Mus musculus*), and dm3 (*Drosophila melanogaster*) assemblies were downloaded from the UCSC  
940 database. Publicly available tandem datafiles of ChIP-seq<sup>21</sup> on histone H3 modifications and  
941 RNA-seq<sup>22</sup> for each analyzed cell sample in each species were downloaded from the ENCODE,  
942 modENCODE or NCBI's SRA databases [69, 70, 71, 72, 73, 74, 75].

943 The criteria for selecting cell type/cell sample datasets in each species was (i) excluding those  
944 with abnormal karyotypes or lacking available RNA-seq data and (ii) among the remaining  
945 datasets, choosing the group that maximizes the number of specific histone H3 modifications  
946 shared. Under these criteria, the comprised cell type/sample datasets in this work were thus:

947  
948 ***H. sapiens*** 6 cell types: HSMM (skeletal muscle myoblasts), HUVEC (umbilical  
949 vein endothelial cells), NHEK (epidermal keratinocytes), GM12878  
950 (B-lymphoblastoids), NHLF (lung fibroblasts) and H1-hESC (embryonic stem  
951 cells).

952 9 histone H3 modifications: H3K4me1, H3K4me2, H3K4me3, H3K9ac,  
953 H3K9me3, H3K27ac, H3K27me3, H3K36me3, and H3K79me2.

954 ***M. musculus*** 5 cell types: 8-weeks-adult heart, 8-weeks-adult liver, E14-day0 (embryonic  
955 stem cells after zero days of differentiation), E14-day4 (embryonic stem cells  
956 after four days of differentiation), and E14-day6 (embryonic stem cells after  
957 six days of differentiation).

958 5 histone H3 modifications: H3K4me1, H3K4me3, H3K27ac, H3K27me3, and  
959 H3K36me3.

960 ***D. melanogaster*** 9 cell samples: 0-4h embryos, 4-8h embryos, 8-12h embryos, 12-16h embryos,  
961 16-20h embryos, 20-24h embryos, L1 larvae, L2 larvae, and pupae.

962 6 histone H3 modifications: H3K4me1, H3K4me3, H3K9ac, H3K9me3,  
963 H3K27ac, and H3K27me3.

964  
965 See [Supplementary Information](#) for the datafile lists in detail.

<sup>21</sup>Comprising 1x36bp, 1x50bp, and 1x75bp reads, depending on the data series (details available via GEO accession codes listed in [Supplementary Information](#)).

<sup>22</sup>Comprising 1x36bp, 1x100bp, and 2x75bp reads, depending on the data series (details available via GEO accession codes listed in [Supplementary Information](#)).



## 966 **ChIP-seq read profiles and normalization**

967 The first steps in the EFilter algorithm by Kumar *et al.*—which predicts mRNA levels in  
968 log-FPKM (fragments per transcript kilobase per million fragments mapped) with high accuracy  
969 ( $R \sim 0.9$ ) [19]—were used to generate ChIP-seq read signal profiles for the histone H3 modifications  
970 data. Namely, (i) dividing the genomic region from 2kbp upstream to 4kbp downstream of each  
971 TSS into 30 200bp-long bins, in each of which ChIP-seq reads were later counted; (ii) dividing the  
972 read count signal for each bin by its corresponding control (Input/IgG) read density to minimize  
973 artifactual peaks; (iii) estimating this control read density within a 1-kbp window centered on  
974 each bin, if the 1-kbp window contained at least 20 reads. Otherwise, a 5-kbp window, or else  
975 a 10-kbp window was used if the control reads were less than 20. When the 10-kbp length was  
976 insufficient, a pseudo-count value of 20 reads per 10kbp was set as the control read density.  
977 This implies that the denominator (i.e. control read density) is at least 0.4 reads per bin. When  
978 replicates were available, the measure of central tendency used was the median of the replicate  
979 read count values.

## 980 **ChIP-seq read count processing**

981 When the original format was SRA, each datafile was pre-processed with standard tools in the  
982 pipeline

```
983  
984 fastq-dump → bwa aln [genome.fa] → bwa samse → samtools view -bS -F 4  
985 → samtools sort → samtools index
```

986 to generate its associated BAM and BAI files. Otherwise, the tool

```
987  
988 bedtools multicov -bams [file.bam] -bed [bins_and_controlwindows.bed]
```

989 was applied (excluding failed-QC reads and duplicate reads by default) directly on the  
990 original BAM<sup>23</sup> file to generate the corresponding read count file in BED format.  
992

## 993 **RNA-seq data processing**

994 The processed data were mRNA abundances in FPKM at RefSeq TSSs. When the original format  
995 was GTF (containing already FPKM values, as in the selected ENCODE RNA-seq datafiles  
996 for *H. sapiens*), those values were used directly in the analysis. When the original format was  
997 SAM, each datafile was pre-processed by first sorting it to generate then a BAM file using  
998 `samtools view -bS`. If otherwise the original format was BAM, mRNA levels at RefSeq TSSs  
999 were then calculated with FPKM as unit using *Cufflinks* [76] directly on the original file with the  
1000 following options:

1001

---

<sup>23</sup>The BAI file is required implicitly.

1002 -GTF-guide <reference\_annotation.(gtf/gff)>  
1003 -frag-bias-correct <genome.fa>  
1004 -multi-read-correct■  
1005

1006 When the same TSS (i.e. same genomic coordinate and strand) displayed more than one identified  
1007 transcript in the *Cufflinks* output, the respective FPKM values were added. Also, when replicates  
1008 were available the measure of central tendency used was the median of the replicate FPKM  
1009 values.

## 1010 Preparation of data input tables

1011 For each of the three species, all TSS<sub>def</sub>—defined as those TSSs with measured mRNA abundance  
1012 (i.e. FPKM > 0) in all cell types/cell samples—were determined. The number of TSS<sub>def</sub> found  
1013 for each species were  $N_{\text{TSS}_{\text{def}}}(\textit{Homo sapiens}) = 14,742$ ,  $N_{\text{TSS}_{\text{def}}}(\textit{Mus musculus}) = 16,021$ , and  
1014  $N_{\text{TSS}_{\text{def}}}(\textit{Drosophila melanogaster}) = 11,632$ . Then, for each cell type/cell sample, 30 genomic  
1015 bins were defined and denoted by the distance (in bp) between their 5'-end and their respective  
1016 TSS<sub>def</sub> genomic coordinate: “-2000”, “-1800”, “-1600”, “-1400”, “-1200”, “-1000”, “-800”,  
1017 “-600”, “-400”, “-200”, “0” (TSS<sub>def</sub> or ‘+1’), “200”, “400”, “600”, “800”, “1000”, “1200”,  
1018 “1400”, “1600”, “1800”, “2000”, “2200”, “2400”, “2600”, “2800”, “3000”, “3200”, “3400”,  
1019 “3600”, and “3800”. Then, for each cell type/cell sample, a ChIP-seq read signal was computed  
1020 for all bins in all TSS<sub>def</sub> genomic regions (e.g. in the “-2000” bin of the *Homo sapiens* TSS with  
1021 RefSeq ID: NM\_001127328, H3K27ac<sub>-2000</sub> = 4.68 in H1-hESC stem cells). Data input tables,  
1022 with  $n_m$  being the number of histone H3 modifications comprised, were generated following this  
1023 structure of rows and columns<sup>24</sup>:

|                               | H3[1] <sub>-2000</sub> | ... | H3[ $n_m$ ] <sub>-2000</sub> | ... | H3[1] <sub>3800</sub> | ... | H3[ $n_m$ ] <sub>3,800</sub> | FPKM |
|-------------------------------|------------------------|-----|------------------------------|-----|-----------------------|-----|------------------------------|------|
| 1                             |                        |     |                              |     |                       |     |                              |      |
| ⋮                             |                        |     |                              |     |                       |     |                              |      |
| $N_{\text{TSS}_{\text{def}}}$ |                        |     |                              |     |                       |     |                              |      |

1025 The tables were written then to these data files:

1026 ***H. sapiens***: Hs\_Gm12878.dat, Hs\_H1hesc.dat, Hs\_Hsmm.dat, Hs\_Huvec.dat,  
1027 Hs\_Nhek.dat, Hs\_Nhlf.dat■

1028 ***M. musculus***: Mm\_Heart.dat, Mm\_Liver.dat, Mm\_E14-d0.dat, Mm\_E14-d4.dat,  
1029 Mm\_E14-d6.dat■

1030 ***D. melanogaster***: Dm\_E0-4.dat, Dm\_E4-8.dat, Dm\_E8-12.dat, Dm\_E12-16.dat,  
1031 Dm\_E16-20.dat, Dm\_E20-24.dat, Dm\_L1.dat, Dm\_L2.dat,  
1032 Dm\_Pupae.dat■

<sup>24</sup>For reference, additional columns were appended in the generated .dat files after the FPKM column with the chromosome, position, strand and RefSeq ID of each TSS<sub>def</sub>.

### 1033 Computation of *ctalk\_non\_epi* profiles

1034 If the variables  $X_j$  (representing the signal for histone H3 modification  $X$  in the genomic bin  
 1035  $j \in \{-2000, \dots, 3800\}$ ),  $Y_k$  (representing the signal for histone H3 modification  $Y$  in the  
 1036 genomic bin  $k \in \{-2000, \dots, 3800\}$ ) and  $Z$  (representing FPKM values) are random variables,  
 1037 then the covariance of  $X_j$  and  $Y_k$  can be decomposed directly in terms of their linear relationship  
 1038 with  $Z$  as the sum

$$\text{Cov}(X_j, Y_k) = \underbrace{\frac{\text{Cov}(X_j, Z)\text{Cov}(Y_k, Z)}{\text{Var}(Z)}}_{\substack{\text{covariance of } X_j \text{ and } Y_k \\ \text{resulting from their} \\ \text{linear relationship with } Z}} + \underbrace{\text{Cov}(X_j, Y_k|Z)}_{\substack{\text{covariance of } X_j \text{ and } Y_k \\ \text{orthogonal to } Z}}, \quad (1)$$

1039 where the second summand  $\text{Cov}(X_j, Y_k|Z)$  is the partial covariance between  $X_j$  and  $Y_k$  given  $Z$ .  
 1040 It is easy to see that  $\text{Cov}(X_j, Y_k|Z)$  is a local approximation of Nanney’s constraints  $C_N$  on  
 1041 histone H3 modifications, as anticipated in the preliminary theoretical definitions<sup>25</sup>. To make the  
 1042 *ctalk\_non\_epi* profiles comparable however,  $\text{Cov}(X_j, Y_k|Z)$  values have to be normalized<sup>26</sup> by the  
 1043 standard deviations of the residuals of  $X_j$  and  $Y_k$  with respect to  $Z$ . In other words, the partial  
 1044 correlation  $\text{Cor}(X_j, Y_k|Z)$  values were needed. Nevertheless, a correlation value does not have a  
 1045 straightforward interpretation, whereas its square—typically known as *coefficient of determination*,  
 1046 *effect size of the correlation*, or simply  $r^2$ —does: it represents the relative (i.e. fraction of) variance  
 1047 of one random variable explained by the other. For this reason,  $\text{Cor}(X_j, Y_k|Z)^2$  was used to  
 1048 represent the strength of the association, and then multiplied by the sign of the correlation to  
 1049 represent the direction of the association. Thus, after  $\log_2$ -transforming the  $X_j$ ,  $Y_k$  and  $Z$  data,  
 1050 each pairwise combination of bin-specific histone H3 modifications  $\{X_j, Y_k\}$  contributed with the  
 1051 value

$$\text{ctalk\_non\_epi}(X_j, Y_k) = \underbrace{\text{sgn}(\text{Cor}(X_j, Y_k|Z))}_{\substack{\text{partial correlation} \\ \text{sign} \in \{-1, 1\}}} \underbrace{(\text{Cor}(X_j, Y_k|Z))^2}_{\substack{\text{partial correlation} \\ \text{strength} \in [-1, 1]}}. \quad (2)$$

1052 This implies that for each pairwise combination of histone H3 modifications  $\{X, Y\}$ , there  
 1053 are  $30$  (bins for  $X$ )  $\times$   $30$  (bins for  $Y$ ) =  $900$  (bin-combination-specific *ctalk\_non\_epi* values).  
 1054 To increase the robustness of the analysis against the departures of the actual nucleosome  
 1055 distributions from the  $30 \times 200$ -bp bins model, the values were then sorted in descending order  
 1056 and placed in a 900-tuple.

<sup>25</sup>A straightforward corollary is that Waddington’s constraints  $C_W$  can in turn be approximated locally by  $\frac{\text{Cov}(X_j, Z)\text{Cov}(Y_k, Z)}{\text{Var}(Z)}$ .

<sup>26</sup>At the cost of losing the sum decomposition property, which was used here for explanatory purposes.

1057 For a cell type/cell sample from a species with data for  $n_m$  histone H3 modifications,  
1058 e.g.  $n_m(\textit{Mus musculus}) = 5$ , the length of the final *ctalk\_non\_epi* profile comprising all  
1059 possible  $\{X, Y\}$  combinations would be  ${}^{n_m}C_2 \times 900$ . However, a final data filtering was  
1060 performed.

1061 The justification for this additional filtering was that some pairwise partial  
1062 correlation values were expected a priori to be strong and significant, which was  
1063 later confirmed. Namely, (i) those involving the same histone H3 modification in  
1064 the same amino acid residue (e.g.  $\text{Cor}(\text{H3K9ac}_{-200}, \text{H3K9ac}_{-400} | \text{FPKM}) > 0$ ;  
1065  $\text{Cor}(\text{H3K4me3}_{-200}, \text{H3K4me3}_{-200} | \text{FPKM}) = 1$ ) (ii) those involving a  
1066 different type of histone H3 modification in the same amino acid residue  
1067 (e.g.  $\text{Cor}(\text{H3K27ac}_{-800}, \text{H3K27me3}_{-600} | \text{FPKM}) < 0$ ), and (iii) those involving  
1068 the same type of histone H3 modification in the same amino acid residue  
1069 (e.g.  $\text{Cor}(\text{H3K4me2}_{-400}, \text{H3K4me3}_{-400} | \text{FPKM}) > 0$ ) in part because ChIP-antibody  
1070 cross reactivity has been shown able to introduce artifacts on the accurate assessment of  
1071 some histone-crosstalk associations [20, 21]. For these reasons, in each species all pairwise  
1072 combinations of histone H3 modifications involving the same amino acid residue were then  
1073 identified as “trivial” and excluded from the *ctalk\_non\_epi* profiles construction. E.g., since  
1074 for *Mus musculus* the comprised histone modifications were H3K4me1, H3K4me3, H3K27ac,  
1075 H3K27me3, and H3K36me3 ( $n_m = 5$ ), the pairwise combinations H3K4me1–H3K4me3 and  
1076 H3K27ac–H3K27me3 were filtered out. Therefore, the length of the *Mus musculus ctalk\_non\_epi*  
1077 profiles was  $({}^5C_2 - 2) \times 900 = 7,200$ .

## 1078 Statistical significance assessment

1079 The statistical significance of the partial correlation  $\text{Cor}(X_j, Y_k | Z)$  values, necessary for  
1080 constructing the *ctalk\_non\_epi* profiles, was estimated using Fisher’s z-transformation [77]. Under  
1081 the null hypothesis  $\text{Cor}(X_j, Y_k | Z) = 0$  the statistic  $z = \sqrt{N_{\text{TSS}_{\text{def}}} - |Z| - 3} \frac{1}{2} \ln \left( \frac{1 + \text{Cor}(X_j, Y_k | Z)}{1 - \text{Cor}(X_j, Y_k | Z)} \right)$ ,  
1082 where  $N_{\text{TSS}_{\text{def}}}$  is the sample size and  $|Z| = 1$  (i.e. one control variable), follows asymptotically a  
1083  $N(0, 1)$  distribution. The p-values can be then computed easily using the  $N(0, 1)$  probability  
1084 function.

1085 Multiple comparisons correction of the p-values associated to each *ctalk\_non\_epi* profile was  
1086 performed using the Benjamini-Yekutieli method [78]. The parameter used was the number of all  
1087 possible<sup>27</sup> comparisons:  $({}^{n_m \times 30}C_2)$ . From the resulting q-values associated to each *ctalk\_non\_epi*  
1088 profile an empirical cumulative distribution was obtained, which in turn was used to compute  
1089 a threshold  $t$ . The value of  $t$  was optimized to be the maximum value such that within the  
1090 q-values smaller than  $t$  is expected less than 1 false-positive partial correlation. Consequently,  
1091 if  $\text{q-value}[i] \geq t$  then the associated partial correlation value was identified as not significant  
1092 (i.e. zero) in the respective *ctalk\_non\_epi* profile.

<sup>27</sup>Before excluding “trivial” pairwise combinations of histone H3 modifications, to further increase the conservativeness of the correction.

## 1093 **Unsupervised hierarchical clustering of *ctalk\_non\_epi* and mRNA** 1094 **abundance profiles**

1095 The goal of this step was to evaluate the significant *ctalk\_non\_epi*-profile clusters—if any—in the  
1096 phenograms (i.e. “phenotypic similarity dendrograms”) obtained from unsupervised hierarchical  
1097 clustering analyses (unsupervised HCA). For each species, the analyses were conducted on  
1098 (i) the *ctalk\_non\_epi* profiles of each cell type/sample (**Figure 1A, 1C, and 1E**) and (ii) the  
1099  $\log_2$ -transformed FPKM profiles (i.e mRNA abundance) of each cell type/sample (**Figure 1B, 1D,**  
1100 **and 1F**). Important to the HCA technique is the choice of a metric (for determining the distance  
1101 between any two profiles) and a cluster-linkage method (for determining the distance between  
1102 any two clusters).

1103 Different ChIP-seq antibodies display differential binding affinities (with respect to different  
1104 epitopes or even the same epitope, depending on the manufacturer) that are intrinsic and  
1105 irrespective to the biological phenomenon of interest. For this reason, comparing directly  
1106 the strengths (i.e. magnitudes) in the *ctalk\_non\_epi* profiles (e.g. using Euclidean distance as  
1107 metric) is to introduce significant biases in the analysis. In contrast, the “correlation distance”  
1108 metric—customarily used for comparing gene expression profiles—defined between any two  
1109 profiles  $pro[i], pro[j]$  as

$$d_r(pro[i], pro[j]) = 1 - \text{Cor}(pro[i], pro[j]) \quad (3)$$

1110 compares instead the “shape” of the profiles<sup>28</sup>, hence it was the metric used here. On the other  
1111 hand, the cluster-linkage method chosen was the “average” method or UPGMA (Unweighted Pair  
1112 Group Method with Arithmetic Mean) in which the distance  $D(A, B)$  between any clusters  $A$  and  
1113  $B$  is defined as

$$D(A, B) = \frac{1}{|A||B|} \sum_{\substack{pro[k] \in A \\ pro[l] \in B}} d_r(pro[k], pro[l]), \quad (4)$$

1114 that is, the mean of all distances  $d_r(pro[k], pro[l])$  such that  $pro[k] \in A$  and  $pro[l] \in B$  (this  
1115 method was chosen because it has been shown to yield the highest cophenetic correlation values  
1116 when using the “correlation distance” metric [79]). Cluster statistical significance was assessed as  
1117 *au* (approximately unbiased) and *bp* (bootstrap probability) significance scores by non-parametric  
1118 bootstrap resampling using the *Pvclust* [24] add-on package for the *R* software [80]. The number  
1119 of bootstrap replicates in each analysis was 10,000.

---

<sup>28</sup> As a consequence of what was highlighted previously, the “correlation distance” metric is also invariant under linear transformations of the profiles.

## 1120 Suitability of FPKM as unit of mRNA abundance

1121 Previous research has pinpointed that FPKM may not always be an adequate unit of transcript  
1122 abundance in differential expression studies. It was shown that, if transcript size distribution  
1123 varies significantly among the samples, FPKM/RPKM<sup>29</sup> will introduce biases. For this reason  
1124 another abundance unit TPM (transcripts per million)—which is a linear transformation of the  
1125 FPKM value for each sample—was proposed to overcome the limitation [81]. However, this issue  
1126 was not a problem for this study.

1127 This is because partial correlation, used to construct the *ctalk\_non\_epi* profiles later  
1128 subject to HCA, is invariant under linear transformations of the control variable  $Z$   
1129 (i.e.  $\text{Cor}(X_j, Y_k|Z) = \text{Cor}(X_j, Y_k|aZ + b)$  for any two scalars  $\{a, b\}$ ). Importantly, this property  
1130 also implies that *ctalk\_non\_epi* profiles are controlling not only for mRNA abundance but also  
1131 for any other biological variable displaying a strong linear relationship with mRNA abundance  
1132 (e.g. chromatin accessibility represented by DNase I hypersensitivity, as shown in [20]). Similarly,  
1133 the unsupervised hierarchical clustering of mRNA abundance profiles is invariant under linear  
1134 transformations of the profiles, since  $\text{Cor}(Z_i, Z_j) = \text{Cor}(aZ_i + b, cZ_j + d)$  provided  $ac > 0$ .

---

<sup>29</sup>Reads per transcript kilobase per million fragments mapped.



## 1135 **Acknowledgements**

1136 I wish to thank the following people:

- 1137 • John Tyler Dodge, horn soloist at the *Orquesta Filarmónica de Santiago*, for reviewing most  
1138 of the English in this paper and his valuable questions, which pushed me to the limit of my  
1139 abilities in the purpose of making this paper self-explanatory.
- 1140 • Miguel Allende, director of the FONDAP Center for Genome Regulation (see details in the  
1141 institutional acknowledgements below).
- 1142 • Alejandro Maass, professor at the Center for Mathematical Modeling (CMM), Universidad  
1143 de Chile, for his special interest in this work and his interesting questions.
- 1144 • My anonymous colleagues who reviewed the grant proposal on behalf of FONDECYT (see  
1145 below).

1146

1147 Also, I wish to thank the following institutions:

- 1148 • The National Fund for Scientific and Technological Development (FONDECYT, Chile) for  
1149 the postdoctoral grant (see details in [Funding](#)).
- 1150 • Universidad Andrés Bello and its Faculty of Biological Sciences for sponsoring my  
1151 postdoctoral grant proposal to FONDECYT.
- 1152 • The FONDAP Center for Genome Regulation (CGR, Chile) for generously granting me a  
1153 workplace for more than a year and giving me the opportunity to share some preliminary  
1154 results of this work with other colleagues at the CGR.
- 1155 • The National Laboratory for High Performance Computing (NLHPC, Chile) for providing  
1156 me with a free academic account, which helped me carry out efficiently most of the  
1157 computational analyses described in this paper.
- 1158 • The *Math<sup>omics</sup>* Lab (Chile), for kindly helping me with the setup of my NLHPC account.

1159 **Additional information**

1160 No institution (including the funder) or person other than the author had any role in  
1161 study conception, design, publicly-available data collection, computational analysis, theory  
1162 development, paper writing, or the decision to submit this preprint to bioRxiv.

1163 **Copyright**

1164 The copyright holder for this preprint is the author. It is made made available under the  
1165 Creative Commons Attribution 4.0 International License. To view a copy of this license, visit  
1166 <http://creativecommons.org/licenses/by/4.0/>.

1167

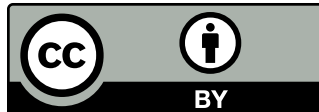

1168

1169 **Funding**

|      | Funder                                                                | Grant reference number | Author           |
|------|-----------------------------------------------------------------------|------------------------|------------------|
| 1170 | National Fund for Scientific and Technological Development (FONDECYT) | 3140328                | Felipe A. Veloso |

## 1171 References

- 1172 [1] Slack JMW (2002) Timeline: Conrad Hal Waddington: the last renaissance biologist? *Nat*  
1173 *Rev Genet* 3: 889–895. doi: [10.1038/nrg933](https://doi.org/10.1038/nrg933).
- 1174 [2] Waddington CH (1957) *The strategy of the genes: a discussion of some aspects of theoretical*  
1175 *biology*. London: Allen & Unwin.
- 1176 [3] Takahashi K, Yamanaka S (2006) Induction of pluripotent stem cells from mouse embryonic  
1177 and adult fibroblast cultures by defined factors. *Cell* 126: 663–676. doi:  
1178 [10.1016/j.cell.2006.07.024](https://doi.org/10.1016/j.cell.2006.07.024).
- 1179 [4] Wolffe AP (1999) Epigenetics: Regulation through repression. *Science* 286: 481–486. doi:  
1180 [10.1126/science.286.5439.481](https://doi.org/10.1126/science.286.5439.481).
- 1181 [5] Bonasio R, Tu S, Reinberg D (2010) Molecular signals of epigenetic states. *Science* 330:  
1182 612–6. doi: [10.1126/science.1191078](https://doi.org/10.1126/science.1191078).
- 1183 [6] Kamakura M (2011) Royalactin induces queen differentiation in honeybees. *Nature* 473:  
1184 478–483. doi: [10.1038/nature10093](https://doi.org/10.1038/nature10093).
- 1185 [7] Fraser P (2010). Defining epigenetics. Interviews by G. Riddihough. *Science* [Video podcast]  
1186 00:05:34–00:05:47. URL <http://videolab.sciencemag.org/featured/650920373001/1>.
- 1187 [8] Orphanides G, Reinberg D (2002) A unified theory of gene expression. *Cell* 108: 439–451.  
1188 doi: [10.1016/s0092-8674\(02\)00655-4](https://doi.org/10.1016/s0092-8674(02)00655-4).
- 1189 [9] Li G, Reinberg D (2011) Chromatin higher-order structures and gene regulation. *Current*  
1190 *Opinion in Genetics & Development* 21: 175–186. doi: [10.1016/j.gde.2011.01.022](https://doi.org/10.1016/j.gde.2011.01.022).
- 1191 [10] Cope NF, Fraser P, Eskiw CH (2010) The yin and yang of chromatin spatial organization.  
1192 *Genome Biol* 11: 204. doi: [10.1186/gb-2010-11-3-204](https://doi.org/10.1186/gb-2010-11-3-204).
- 1193 [11] Ralston A, Shaw K (2008) Gene expression regulates cell differentiation. *Nat Educ* 1: 127.  
1194 URL [http:](http://www.nature.com/scitable/topicpage/gene-expression-regulates-cell-differentiation-931)  
1195 [//www.nature.com/scitable/topicpage/gene-expression-regulates-cell-differentiation-931](http://www.nature.com/scitable/topicpage/gene-expression-regulates-cell-differentiation-931).
- 1196 [12] Berger SL, Kouzarides T, Shiekhata R, Shilatifard A (2009) An operational definition of  
1197 epigenetics. *Genes & Development* 23: 781–783. doi: [10.1101/gad.1787609](https://doi.org/10.1101/gad.1787609).
- 1198 [13] Reinberg D (2010). Defining epigenetics. Interviews by G. Riddihough. *Science* [Video  
1199 podcast] 00:01:25–00:01:35. URL <http://videolab.sciencemag.org/featured/650920373001/1>.
- 1200 [14] Arnone MI, Davidson EH (1997) The hardwiring of development: organization and function  
1201 of genomic regulatory systems. *Development* 124: 1851–64.
- 1202 [15] Rose LS, Kempthues KJ (1998) Early patterning of the *C. elegans* embryo. *Annual Review of*  
1203 *Genetics* 32: 521–545. doi: [10.1146/annurev.genet.32.1.521](https://doi.org/10.1146/annurev.genet.32.1.521).

- 1204 [16] Ladewig J, Koch P, Brüstle O (2013) Leveling waddington: the emergence of direct  
1205 programming and the loss of cell fate hierarchies. *Nature Reviews Molecular Cell Biology* 14:  
1206 225–236. doi: [10.1038/nrm3543](https://doi.org/10.1038/nrm3543).
- 1207 [17] Nanney DL (1958) Epigenetic control systems. *Proceedings of the National Academy of*  
1208 *Sciences* 44: 712–717. doi: [10.1073/pnas.44.7.712](https://doi.org/10.1073/pnas.44.7.712).
- 1209 [18] Huang S (2012) The molecular and mathematical basis of waddington's epigenetic landscape:  
1210 a framework for post-darwinian biology? *Bioessays* 34: 149-57. doi: [10.1002/bies.201100031](https://doi.org/10.1002/bies.201100031).
- 1211 [19] Kumar V, Muratani M, Rayan NA, Kraus P, Lufkin T, et al. (2013) Uniform, optimal signal  
1212 processing of mapped deep-sequencing data. *Nat Biotechnol* 31: 615–622. doi:  
1213 [10.1038/nbt.2596](https://doi.org/10.1038/nbt.2596).
- 1214 [20] Lasserre J, Chung HR, Vingron M (2013) Finding associations among histone modifications  
1215 using sparse partial correlation networks. *PLoS Comput Biol* 9: e1003168. doi:  
1216 [10.1371/journal.pcbi.1003168](https://doi.org/10.1371/journal.pcbi.1003168).
- 1217 [21] Peach SE, Rudomin EL, Udeshi ND, Carr SA, Jaffe JD (2012) Quantitative assessment of  
1218 chromatin immunoprecipitation grade antibodies directed against histone modifications  
1219 reveals patterns of co-occurring marks on histone protein molecules. *Mol Cell Proteomics* 11:  
1220 128-37. doi: [10.1074/mcp.M111.015941](https://doi.org/10.1074/mcp.M111.015941).
- 1221 [22] Schwammle V, Aspalter CM, Sidoli S, Jensen ON (2014) Large scale analysis of co-existing  
1222 post-translational modifications in histone tails reveals global fine structure of cross-talk.  
1223 *Molecular & Cellular Proteomics* 13: 1855–1865. doi: [10.1074/mcp.o113.036335](https://doi.org/10.1074/mcp.o113.036335).
- 1224 [23] Zheng Y, Sweet SMM, Popovic R, Martinez-Garcia E, Tipton JD, et al. (2012) Total kinetic  
1225 analysis reveals how combinatorial methylation patterns are established on lysines 27 and  
1226 36 of histone h3. *Proc Natl Acad Sci U S A* 109: 13549-54. doi: [10.1073/pnas.1205707109](https://doi.org/10.1073/pnas.1205707109).
- 1227 [24] Suzuki R, Shimodaira H (2006) Pvclust: an r package for assessing the uncertainty in  
1228 hierarchical clustering. *Bioinformatics* 22: 1540–1542. doi: [10.1093/bioinformatics/btl117](https://doi.org/10.1093/bioinformatics/btl117).
- 1229 [25] White KP (1999) Microarray analysis of *Drosophila* development during metamorphosis.  
1230 *Science* 286: 2179–2184. doi: [10.1126/science.286.5447.2179](https://doi.org/10.1126/science.286.5447.2179).
- 1231 [26] Cantera R, Ferreiro MJ, Aransay AM, Barrio R (2014) Global gene expression shift during  
1232 the transition from early neural development to late neuronal differentiation in drosophila  
1233 melanogaster. *PLoS ONE* 9: e97703. doi: [10.1371/journal.pone.0097703](https://doi.org/10.1371/journal.pone.0097703).
- 1234 [27] Mody M, Cao Y, Cui Z, Tay KY, Shyong A, et al. (2001) Genome-wide gene expression  
1235 profiles of the developing mouse hippocampus. *Proceedings of the National Academy of*  
1236 *Sciences* 98: 8862–8867. doi: [10.1073/pnas.141244998](https://doi.org/10.1073/pnas.141244998).
- 1237 [28] Fraser P, Bickmore W (2007) Nuclear organization of the genome and the potential for gene  
1238 regulation. *Nature* 447: 413–417. doi: [10.1038/nature05916](https://doi.org/10.1038/nature05916).
- 1239 [29] Haeckel E (1874) Die gastraea-theorie, die phylogenetische classification des thierreichs und  
1240 die homologie der keimblätter. *Jenaische Zeitschrift für Naturwissenschaft* 8: 1-55.
- 1241 [30] Hadzi J (1963) *The evolution of the Metazoa*. Macmillan.

- 1242 [31] Metschnikoff E (1886) Embryologische Studien an Medusen: ein Beitrag zur Genealogie der  
1243 primitiv-Organ. A. Hölder.
- 1244 [32] Kirk DL (2005) A twelve-step program for evolving multicellularity and a division of labor.  
1245 *Bioessays* 27: 299–310. doi: [10.1002/bies.20197](https://doi.org/10.1002/bies.20197).
- 1246 [33] Nielsen C (2008) Six major steps in animal evolution: are we derived sponge larvae?  
1247 *Evolution & Development* 10: 241–257. doi: [10.1111/j.1525-142x.2008.00231.x](https://doi.org/10.1111/j.1525-142x.2008.00231.x).
- 1248 [34] Mikhailov KV, Konstantinova AV, Nikitin MA, Troshin PV, Rusin LY, et al. (2009) The  
1249 origin of metazoa: a transition from temporal to spatial cell differentiation. *Bioessays* 31:  
1250 758–68. doi: [10.1002/bies.200800214](https://doi.org/10.1002/bies.200800214).
- 1251 [35] Levin TC, Greaney AJ, Wetzel L, King N (2014) The rosetteless gene controls development  
1252 in the choanoflagellate *S. rosetta*. *eLife* 3. doi: [10.7554/elife.04070](https://doi.org/10.7554/elife.04070).
- 1253 [36] Kupiec JJ (1997) A darwinian theory for the origin of cellular differentiation. *Molecular and*  
1254 *General Genetics MGG* 255: 201–208. doi: [10.1007/s004380050490](https://doi.org/10.1007/s004380050490).
- 1255 [37] Paldi A (2012) What makes the cell differentiate? *Prog Biophys Mol Biol* 110: 41–3. doi:  
1256 [10.1016/j.pbiomolbio.2012.04.003](https://doi.org/10.1016/j.pbiomolbio.2012.04.003).
- 1257 [38] Kim J (1999) Making sense of emergence. *Philosophical Studies* 95: 3–36. doi:  
1258 [10.1023/a:1004563122154](https://doi.org/10.1023/a:1004563122154).
- 1259 [39] Kim J (2006) Emergence: Core ideas and issues. *Synthese* 151: 547–559. doi:  
1260 [10.1007/s11229-006-9025-0](https://doi.org/10.1007/s11229-006-9025-0).
- 1261 [40] Deacon TW (2012) *Incomplete nature: How mind emerged from matter*. New York: W.W.  
1262 Norton & Co., 1st edition.
- 1263 [41] Chen L, Xiao S, Pang K, Zhou C, Yuan X (2014) Cell differentiation and germ-soma  
1264 separation in ediacaran animal embryo-like fossils. *Nature* doi: [10.1038/nature13766](https://doi.org/10.1038/nature13766).
- 1265 [42] Meyerowitz EM (2002) Plants compared to animals: The broadest comparative study of  
1266 development. *Science* 295: 1482–1485. doi: [10.1126/science.1066609](https://doi.org/10.1126/science.1066609).
- 1267 [43] Donoghue PCJ, Antcliffe JB (2010) Early life: Origins of multicellularity. *Nature* 466: 41–42.  
1268 doi: [10.1038/466041a](https://doi.org/10.1038/466041a).
- 1269 [44] van Nimwegen E (2003) Scaling laws in the functional content of genomes. *Trends in*  
1270 *Genetics* 19: 479–484. doi: [10.1016/s0168-9525\(03\)00203-8](https://doi.org/10.1016/s0168-9525(03)00203-8).
- 1271 [45] Young HE, Black AC (2003) Adult stem cells. *Anat Rec* 276A: 75–102. doi:  
1272 [10.1002/ar.a.10134](https://doi.org/10.1002/ar.a.10134).
- 1273 [46] Cai S, Fu X, Sheng Z (2007) Dedifferentiation: A new approach in stem cell research.  
1274 *BioScience* 57: 655. doi: [10.1641/b570805](https://doi.org/10.1641/b570805).
- 1275 [47] Donà E, Barry JD, Valentin G, Quirin C, Khmelinskii A, et al. (2013) Directional tissue  
1276 migration through a self-generated chemokine gradient. *Nature* 503: 285–9. doi:  
1277 [10.1038/nature12635](https://doi.org/10.1038/nature12635).

- 1278 [48] Venkiteswaran G, Lewellis SW, Wang J, Reynolds E, Nicholson C, et al. (2013) Generation  
1279 and dynamics of an endogenous, self-generated signaling gradient across a migrating tissue.  
1280 Cell 155: 674–687. doi: [10.1016/j.cell.2013.09.046](https://doi.org/10.1016/j.cell.2013.09.046).
- 1281 [49] Kauffman S, Clayton P (2006) On emergence, agency, and organization. Biology &  
1282 Philosophy 21: 501–521. doi: [10.1007/s10539-005-9003-9](https://doi.org/10.1007/s10539-005-9003-9).
- 1283 [50] Combs PA, Eisen MB (2013) Sequencing mrna from cryo-sliced *Drosophila* embryos to  
1284 determine genome-wide spatial patterns of gene expression. PLoS One 8: e71820. doi:  
1285 [10.1371/journal.pone.0071820](https://doi.org/10.1371/journal.pone.0071820).
- 1286 [51] Wu AR, Neff NF, Kalisky T, Dalerba P, Treutlein B, et al. (2013) Quantitative assessment of  
1287 single-cell RNA-sequencing methods. Nat Meth 11: 41–46. doi: [10.1038/nmeth.2694](https://doi.org/10.1038/nmeth.2694).
- 1288 [52] Roy S, Morse D (2012) A full suite of histone and histone modifying genes are transcribed in  
1289 the dinoflagellate *Lingulodinium*. PLoS One 7: e34340. doi: [10.1371/journal.pone.0034340](https://doi.org/10.1371/journal.pone.0034340).
- 1290 [53] Meletis K, Barnabé-Heider F, Carlén M, Evergren E, Tomilin N, et al. (2008) Spinal cord  
1291 injury reveals multilineage differentiation of ependymal cells. Plos Biol 6: e182. doi:  
1292 [10.1371/journal.pbio.0060182](https://doi.org/10.1371/journal.pbio.0060182).
- 1293 [54] Sømme L (1982) Supercooling and winter survival in terrestrial arthropods. Comparative  
1294 Biochemistry and Physiology Part A: Physiology 73: 519–543. doi:  
1295 [10.1016/0300-9629\(82\)90260-2](https://doi.org/10.1016/0300-9629(82)90260-2).
- 1296 [55] Murphy WJ, Collier GE (1997) A molecular phylogeny for aplocheiloid fishes  
1297 (atherinomorpha, cyprinodontiformes): the role of vicariance and the origins of annualism.  
1298 Molecular Biology and Evolution 14: 790–799.
- 1299 [56] Niethammer P, Grabher C, Look AT, Mitchison TJ (2009) A tissue-scale gradient of  
1300 hydrogen peroxide mediates rapid wound detection in zebrafish. Nature 459: 996–999. doi:  
1301 [10.1038/nature08119](https://doi.org/10.1038/nature08119).
- 1302 [57] Unsworth BR, Lelkes PI (1998) Growing tissues in microgravity. Nat Med 4: 901–907. doi:  
1303 [10.1038/nm0898-901](https://doi.org/10.1038/nm0898-901).
- 1304 [58] Correll MJ, Pyle TP, Millar KDL, Sun Y, Yao J, et al. (2013) Transcriptome analyses of  
1305 arabidopsis thaliana seedlings grown in space: implications for gravity-responsive genes.  
1306 Planta 238: 519–533. doi: [10.1007/s00425-013-1909-x](https://doi.org/10.1007/s00425-013-1909-x).
- 1307 [59] Hammond T, Lewis F, Goodwin T, Linnehan R, Wolf D, et al. (1999) Gene expression in  
1308 space. Nature Medicine 5: 359–359. doi: [10.1038/7331](https://doi.org/10.1038/7331).
- 1309 [60] Crawford-Young SJ (2006) Effects of microgravity on cell cytoskeleton and embryogenesis.  
1310 The International Journal of Developmental Biology 50: 183–191. doi: [10.1387/ijdb.052077sc](https://doi.org/10.1387/ijdb.052077sc).
- 1311 [61] Ingber D (1999) How cells (might) sense microgravity. The FASEB Journal 13: S3–S15.
- 1312 [62] Pojman JA, Bessonov N, Volpert V, Paley MS (2007) Miscible fluids in microgravity (MFMG):  
1313 A zero-upmass investigation on the international space station. Microgravity Sci Technol 19:  
1314 33–41. doi: [10.1007/bf02870987](https://doi.org/10.1007/bf02870987).



- 1315 [63] Rajjou L, Duval M, Gallardo K, Catusse J, Bally J, et al. (2012) Seed germination and vigor.  
1316 *Annu Rev Plant Biol* 63: 507–533. doi: [10.1146/annurev-arplant-042811-105550](https://doi.org/10.1146/annurev-arplant-042811-105550).
- 1317 [64] Finch-Savage WE, Leubner-Metzger G (2006) Seed dormancy and the control of  
1318 germination. *New Phytologist* 171: 501–523. doi: [10.1111/j.1469-8137.2006.01787.x](https://doi.org/10.1111/j.1469-8137.2006.01787.x).
- 1319 [65] Smet ID, Beeckman T (2011) Asymmetric cell division in land plants and algae: the driving  
1320 force for differentiation. *Nature Reviews Molecular Cell Biology* 12: 177–188. doi:  
1321 [10.1038/nrm3064](https://doi.org/10.1038/nrm3064).
- 1322 [66] Greenbaum D, Colangelo C, Williams K, Gerstein M (2003) Comparing protein abundance  
1323 and mrna expression levels on a genomic scale. *Genome Biol* 4: 117.
- 1324 [67] Ning K, Fermin D, Nesvizhskii AI (2012) Comparative analysis of different label-free mass  
1325 spectrometry based protein abundance estimates and their correlation with RNA-seq gene  
1326 expression data. *J Proteome Res* 11: 2261–2271. doi: [10.1021/pr201052x](https://doi.org/10.1021/pr201052x).
- 1327 [68] Varela FG, Maturana HR, Uribe R (1974) Autopoiesis: the organization of living systems, its  
1328 characterization and a model. *Biosystems* 5: 187–196.
- 1329 [69] Celniker SE, Dillon LAL, Gerstein MB, Gunsalus KC, Henikoff S, et al. (2009) Unlocking the  
1330 secrets of the genome. *Nature* 459: 927–930. doi: [10.1038/459927a](https://doi.org/10.1038/459927a).
- 1331 [70] Ram O, Goren A, Amit I, Shores N, Yosef N, et al. (2011) Combinatorial patterning of  
1332 chromatin regulators uncovered by genome-wide location analysis in human cells. *Cell* 147:  
1333 1628–1639. doi: [10.1016/j.cell.2011.09.057](https://doi.org/10.1016/j.cell.2011.09.057).
- 1334 [71] Nègre N, Brown CD, Ma L, Bristow CA, Miller SW, et al. (2011) A cis-regulatory map of the  
1335 *Drosophila* genome. *Nature* 471: 527–531. doi: [10.1038/nature09990](https://doi.org/10.1038/nature09990).
- 1336 [72] Dunham I, Kundaje A, Aldred SF, Collins PJ, Davis CA, et al. (2012) An integrated  
1337 encyclopedia of DNA elements in the human genome. *Nature* 489: 57–74. doi:  
1338 [10.1038/nature11247](https://doi.org/10.1038/nature11247).
- 1339 [73] Xiao S, Xie D, Cao X, Yu P, Xing X, et al. (2012) Comparative epigenomic annotation of  
1340 regulatory DNA. *Cell* 149: 1381–1392. doi: [10.1016/j.cell.2012.04.029](https://doi.org/10.1016/j.cell.2012.04.029).
- 1341 [74] Djebali S, Davis CA, Merkel A, Dobin A, Lassmann T, et al. (2012) Landscape of  
1342 transcription in human cells. *Nature* 489: 101–108. doi: [10.1038/nature11233](https://doi.org/10.1038/nature11233).
- 1343 [75] Stamatoyannopoulos JA, Snyder M, Hardison R, Ren B, Gingeras T, et al. (2012) An  
1344 encyclopedia of mouse DNA elements (mouse ENCODE). *Genome Biol* 13: 418. doi:  
1345 [10.1186/gb-2012-13-8-418](https://doi.org/10.1186/gb-2012-13-8-418).
- 1346 [76] Trapnell C, Williams BA, Pertea G, Mortazavi A, Kwan G, et al. (2010) Transcript assembly  
1347 and quantification by RNA-seq reveals unannotated transcripts and isoform switching  
1348 during cell differentiation. *Nat Biotechnol* 28: 511–515. doi: [10.1038/nbt.1621](https://doi.org/10.1038/nbt.1621).
- 1349 [77] Fisher RA (1915) Frequency distribution of the values of the correlation coefficient in samples  
1350 from an indefinitely large population. *Biometrika* : 507–521.

- 1351 [78] Benjamini Y, Yekutieli D (2001) The control of the false discovery rate in multiple testing  
1352 under dependency. *Annals of statistics* : 1165–1188.
- 1353 [79] Saraçlı S, Doğan N, Doğan I (2013) Comparison of hierarchical cluster analysis methods by  
1354 cophenetic correlation. *Journal of Inequalities and Applications* 2013: 203. doi:  
1355 [10.1186/1029-242x-2013-203](https://doi.org/10.1186/1029-242x-2013-203).
- 1356 [80] R Core Team (2014) R: A Language and Environment for Statistical Computing. R  
1357 Foundation for Statistical Computing, Vienna, Austria. URL <http://www.R-project.org/>.
- 1358 [81] Wagner GP, Kin K, Lynch VJ (2012) Measurement of mRNA abundance using RNA-seq  
1359 data: RPKM measure is inconsistent among samples. *Theory Biosci* 131: 281–285. doi:  
1360 [10.1007/s12064-012-0162-3](https://doi.org/10.1007/s12064-012-0162-3).
- 1361 [82] Shannon CE, Weaver W (1949) *The mathematical theory of communication*. Urbana:  
1362 University of Illinois Press.
- 1363 [83] Watanabe S (1960) Information theoretical analysis of multivariate correlation. *IBM Journal*  
1364 *of research and development* 4: 66–82.
- 1365 [84] Voss TC, Hager GL (2014) Dynamic regulation of transcriptional states by chromatin and  
1366 transcription factors. *Nat Rev Genet* 15: 69-81. doi: [10.1038/nrg3623](https://doi.org/10.1038/nrg3623).
- 1367 [85] Altun Z, Hall D (2002). *Wormatlas*.

## 1368 Appendix

### 1369 Formal theoretical definitions and notation

1370 The following definitions and notation regard molecular dynamics and spatial topology. To avoid  
1371 ambiguity, the definitions regarding molecular dynamics will be derived from instantaneously  
1372 defined random variables—measurable only partially and approximately but easily imaginable  
1373 from a fundamental point of view—using Shannon’s information theory [82] measures<sup>30</sup>.  
1374 For further explanatory convenience, these random variables will be seen sometimes as sets.  
1375 Definitions regarding spatial topology will be derived from instantaneously-specified spherical  
1376 coordinates given the spherical/circular symmetry that developing embryos and cell populations  
1377 display in general. Additionally, a brief glossary will be provided with the most relevant notation  
1378 and concepts, described there in less rigorous terms yet logically sufficient for the theoretical  
1379 formulation. If desired, the reader may then skip to this glossary and return to the formal  
1380 definitions at any point later.

### 1381 Spatial topology

1382 Let  $X_{(1;t)}, \dots, X_{(n;t)}$  be all cells in a given organism or cell population<sup>31</sup> of the eukaryotic  
1383 species  $X$  at a given instant  $t$ , spatially-specified in spherical coordinates. These spherical  
1384 coordinates are  $r$  (radial distance),  $\theta$  (azimuthal angle), and  $\phi$  (polar angle). The origin of the  
1385 coordinate system is the centroid of the cell population or embryo. Let  $r_{(n;t)}(X_{(1;t)}, \dots, X_{(n;t)})$   
1386 be the radius of the entire cell population or embryo.

1388 **Definition Overall space:**  $S_O(X_{(1;t)}, \dots, X_{(n;t)})$

1389  
1390  $S_O(X_{(1;t)}, \dots, X_{(n;t)}) = \{(r, \theta, \phi) \mid r \leq 0 \leq r_{(n;t)}(X_{(1;t)}, \dots, X_{(n;t)}), 0 \leq \theta < 2\pi, 0 \leq \phi \leq \pi\}$ ;  
1391 that is, the set of all points  $(r, \theta, \phi)$  within the radius  $r_{(n;t)}$ .

1392 **Remark** This is the space occupied by the entire cell population or embryo. It can be expressed  
1393 as the sum of the space occupied by all individual cells in the population/embryo plus the  
1394 associated extracellular space.

1396 **Definition Cell-occupied space:**  $S_C(X_{(1;t)}, \dots, X_{(n;t)})$

1397  $S_C(X_{(1;t)}, \dots, X_{(n;t)}) = \{(r, \theta, \phi) \mid (r, \theta, \phi) \in \bigcup_{i=1}^n S_O(X_{(i;t)})\}$ ; that is, the union of the sets of  
1398 points  $(r, \theta, \phi)$  spatially-specifying all  $n$  individual cells at a given instant  $t$ .

<sup>30</sup>In a strict sense, molecular dynamics should be represented by multivariate random variables and as a consequence generalized measures (such as Watanabe’s total correlation [83]) of statistical dependence would be needed. Univariate random variables were preferred here for simplicity in the notation.

<sup>31</sup>A single cell or zygote will be considered a cell population where  $n = 1$ . All cells will be treated geometrically as spheres unless specified later. A dividing cell will be regarded as a single cell until division is complete.

1399 **Remark** This is the space occupied by all  $n$  individual cells in the population/embryo at a given  
1400 instant  $t$ .

1401

1402 **Definition** *Extracellular space:*  $S_E(X_{(1;t)}, \dots, X_{(n;t)})$

1403

1404  $S_E(X_{(1;t)}, \dots, X_{(n;t)}) = S_O(X_{(1;t)}, \dots, X_{(n;t)}) \setminus S_C(X_{(1;t)}, \dots, X_{(n;t)})$ ; that is, the set  
1405 difference of  $S_O$  and  $S_C$ , i.e. the set of points  $(r, \theta, \phi)$  such that  $(r, \theta, \phi) \in S_T(X_{(1;t)}, \dots, X_{(n;t)})$   
1406 and  $(r, \theta, \phi) \notin S_T(X_{(1;t)}, \dots, X_{(n;t)})$ .

1407 **Remark** Whereas this may seem an over-formalized definition of the widely-known concept  
1408 of extracellular space, the theory postulated here shows its usefulness for describing some  
1409 corollaries rigorously.

1410

## 1411 Molecular dynamics

1412 Let  $X_{(i;t)}$  be the  $i^{\text{th}}$  cell<sup>32</sup> of a given organism or cell population of the eukaryotic  
1413 species  $X$  at a given instant  $t$ , let  $G(X_{(i;t)})$  be its genomic sequence, let  $T(X_{(i;t)})$  be the  
1414 instantaneous transcription rate at the transcription start site, let  $F(X_{(i;t)})$  be its entire  
1415 molecular phenotype spatially-specified with respect to the transcription start site (note that  
1416  $F(X_{(i;t)})$  describes implicitly specific molecular abundances), let  $F^\circ(X_{(i;t)})$  be the molecular  
1417 phenotype of the nucleus of  $X_{(i;t)}$ , and let  $F^\star(X_{(i;t)})$  be the cell's molecular phenotype that  
1418 is membrane-exchangeable with the extracellular space  $S_E$  by facilitated diffusion (note that  
1419  $F^\circ(X_{(i;t)}), F^\star(X_{(i;t)}) \subset F(X_{(i;t)})$ ). Importantly, the set  $G(X_{(i;t)}) \cup T(X_{(i;t)}) \cup F(X_{(i;t)})$  describes  
1420 an instantaneously realized state (of interest for this work), and it is not to be confused with a  
1421 state space—the set of all realizable states—in dynamical systems theory. For notation simplicity,  
1422 the argument  $X_{(i;t)}$  will be implicit henceforth unless necessary.

1423

1424 **Definition** *Waddington's constraints*  $C_W(X_{(i;t)}) = I(F; T|G)$ ; that is, the conditional mutual  
1425 information between  $F^\circ$  (spatially-specified nuclear phenotype) and  $T$  (instantaneous  
1426 transcription rate at the TSS) given the value of  $G$  (genomic sequence).

1427 **Remark** Waddington's constraints can be equivalently expressed in terms of Shannon's  
1428 conditional entropies as  $C_W(X_{(i;t)}) = H(F^\circ|G) - H(F^\circ|T, G)$ .

1429 **Remark**  $C_W(X_{(i;t)})$  can be interpreted as a measure of the statistical dependence (i.e. constraint)  
1430 between  $F^\circ$  (spatially-specified nuclear phenotype) and  $T$  (transcription rates) for a given value  
1431 of  $G$ .

1432 **Remark** These constraints are determined by (i) the spatial coordinates in  $F^\circ$  with respect to  
1433 the TSS and (ii) the specific affinities of DNA with respect to the phenotypic elements specified  
1434 in  $F^\circ$  for any given value of  $G$ .

1435

<sup>32</sup>A dividing cell will be regarded as a single cell until division is complete.

1436 **Definition** Waddington's embodiars  $F_W(X_{(i;t)})$  is the largest subset of  $F^\circ(X_{(i;t)})$  such that  
1437  $I(F_W; T|G) > 0$ .

1438 **Remark** In data analysis, the set  $F_w(X_{(i;t)})$  is a subset of  $F_W(X_{(i;t)})$  if sample  $I(F_w; T|G)$  is  
1439 significantly greater than zero.

1440 **Remark** As mentioned earlier, the quantitative assessment of the hereby defined as Waddington's  
1441 constraints has made possible to predict transcript abundance states from histone modification  
1442 ChIP-seq enrichment profiles near TSSs with high accuracy ( $R \sim 0.9$ ) [19].

1443 **Example** The previous remark implies the following: if  $T$  is approximated by transcript  
1444 abundance and  $F_w$  is approximated by ChIP-seq enrichment, then histone H3 modifications can  
1445 be specified as Waddington's embodiars  $F_W$ .

1446 **Remark** If  $X_{(j,t+\Delta t)}$  is a daughter cell of  $X_{(i;t)}$  and if there are two sets  $F_h(X_{(i;t)}) \subseteq F_W(X_{(i;t)})$   
1447 and  $F_h(X_{(j,t+\Delta t)}) \subseteq F_W(X_{(j,t+\Delta t)})$  such that  $I(F_h(X_{(i;t)}); F_h(X_{(j,t+\Delta t)})) > 0$  (i.e. if Waddington's  
1448 constraints are propagated in a heritable manner), then  $(F_h(X_{(i;t)}) \cup F_h(X_{(j,t+\Delta t)}))$  specifies  
1449 spatially a set of molecular substrates  $E$  that is customarily labeled as "epigenetic regulators".  
1450 Whereas this is a trivial corollary in its strict sense, it highlights the substrate-centered  
1451 character—as opposed to constraint-centered—of the traditional approach known as epigenetic  
1452 landscape. Additionally, this corollary reinforces a point raised in the [introduction](#): the  
1453 misleading—and if taken in a strict sense, logically inconsistent—character of the "regulator"  
1454 label on any molecular substrates satisfying the conditions that define the set  $E$ .

1455

1456 **Definition** Waddington's extracellular propagators  $F_W^\rightarrow(X_{(i;t)})$  is the largest subset of  $F^\star - F_W$   
1457 such that there is a minimal time interval  $\Delta t$  and a quantity  $I_{W(\Delta t)}^\rightarrow > 0$  for which  
1458  $I(F_W(X_{(i;t+\Delta t)}); F_W^\rightarrow(X_{(i;t)})) = I_{W(t)} + I_{W(\Delta t)}^\rightarrow \implies I(F_W(X_{(i;t)}); F_W^\rightarrow(X_{(i;t)})) = I_{W(t)}$ ; that is, the  
1459 largest subset of  $F^\star$  that is not a subset of Waddington's embodiars  $F_W$  at the instant  $t$  but  
1460 elicits a significant change (measurable as the mutual information  $I_{W(\Delta t)}^\rightarrow$ ) in Waddington's  
1461 embodiars  $F_W$  observable after  $\Delta t$ .

1462 **Remark** In data analysis, the set  $F_w^\rightarrow(X_{(i;t)})$  is a subset of  $F_W^\rightarrow(X_{(i;t)})$  if sample  
1463  $I(F_W(X_{(i;t+\Delta t)}); F_w^\rightarrow(X_{(i;t)})) - I(F_W(X_{(i;t)}); F_w^\rightarrow(X_{(i;t)}))$  is significantly greater than zero and if  
1464 the logical implication in the definition (i.e. causality) can be then inferred given the experimental  
1465 design.

1466 **Remark** Note that if  $F_W^\rightarrow(X_{(i;t)}) \neq \emptyset$ , then the alleles specified in  $G$  must account for all  
1467 gene products in  $F$  (spatially-specified phenotype) necessary for the facilitated diffusion of the  
1468 molecules specified in  $F_W^\rightarrow(X_{(i;t)})$  (e.g. functional and sufficiently abundant protein pores or  
1469 carriers, or intracellular transducers if needed).

1470 **Remark** Waddington's extracellular propagators  $F_W^\rightarrow$  may need a certain set of Waddington's  
1471 intracellular propagators (defined with respect to the set  $F - (F^\star \cup F_W)$ ) to satisfy their own  
1472 defining condition.

1473 **Definition** *Nanney's constraints*  $C_N(X_{(i;t)}) = I(F^\circ; F_W|T)$ ; that is, the conditional mutual  
1474 information between  $F^\circ$  (spatially-specified nuclear phenotype) and  $F_W$  (Waddington's  
1475 propagators) given the value of  $T$  (instantaneous transcription rate at the TSS).

1476 **Remark** Nanney's constraints can be equivalently expressed in terms of Shannon's conditional  
1477 entropies as  $C_N(X_{(i;t)}) = H(F^\circ|T) - H(F^\circ|F_W, T)$ .

1478 **Remark**  $C_N(X_{(i;t)})$  can be interpreted as a measure of the statistical dependence (i.e. constraint)  
1479 between  $F^\circ$  (spatially-specified nuclear phenotype) and  $F_W$  (Waddington's propagators) for a  
1480 given value of  $T$ .

1481 **Remark** These constraints are determined by (i) the spatial coordinates in  $F^\circ$  and Waddington's  
1482 propagators  $F_W$  with respect to each other and (ii) the kinetic and structural constraints  
1483 governing the interactions between Waddington's propagators in  $F_W$  and the entire nuclear  
1484 phenotype in  $F^\circ$  for any given value of  $T$ .

1485

1486 **Definition** *Nanney's embodiars*  $F_N(X_{(i;t)})$  is the largest subset of  $F^\circ$  such that  $I(F_N; F_W|T) > 0$ .

1487 **Remark** In data analysis, the set  $F_n(X_{(i;t)})$  is a subset of  $F_N(X_{(i;t)})$  if sample  $I(F_n; F_W|T)$  is  
1488 significantly greater than zero.

1489 **Example** The work cited previously [19], which demonstrated the high predictive power  
1490 of histone modification profiles on transcript abundance, did so developing a trainable  
1491 multivariate linear regression model. In the work presented in this paper, such linearity and  
1492 demonstrated predictive power together made it possible to represent Nanney's constraints with  
1493 the *ctalk\_non\_epi* profiles (see Materials and Methods). In turn, the high statistical significance of  
1494 these *ctalk\_non\_epi* profiles (shown previously in the results) implies that histone H3 modifications  
1495 can be specified as Nanney's embodiars  $F_N$ .

1496 **Remark** At this point it is possible formalize what was highlighted in the beginning of this  
1497 discussion: if  $X_{(i;t)}$  is a human, mouse, or fruit fly cell and  $F_{H3}$  is its set of histone H3  
1498 modifications at transcription start sites, then  $F_{H3} \subseteq (F_W(X_{(i;t)}) \cap F_N(X_{(i;t)}))$ . In other words,  
1499 histone H3 modifications at the TSS are specifiable as Waddington's embodiars  $F_W$  and as  
1500 Nanney's embodiars  $F_N$  *simultaneously*. This critical result will be generalized theoretically for  
1501 cells of any differentiated multicellular organism.

1502

1503 **Definition** *Nanney's extracellular propagators*  $F_N^{\rightarrow}(X_{(i;t)})$  is the largest subset of  $F^\star - F_N$   
1504 such that there is a minimal time interval  $\Delta t$  and a quantity  $I_{N(\Delta t)}^{\rightarrow} > 0$  for which  
1505  $I(F_N(X_{(i;t+\Delta t)}); F_N^{\rightarrow}(X_{(i;t)})) = I_{N(t)} + I_{N(\Delta t)}^{\rightarrow} \implies I(F_N(X_{(i;t)}); F_N^{\rightarrow}(X_{(i;t)})) = I_{N(t)}$ ; that is, the  
1506 largest subset of  $F^\star$  that is not a subset of Nanney's embodiars  $F_N$  at the instant  $t$  but elicits  
1507 a significant change (measurable as the mutual information  $I_{N(\Delta t)}^{\rightarrow}$ ) in Nanney's embodiars  $F_N$   
1508 observable after  $\Delta t$ .



1509 **Remark** In data analysis, the set  $F_n^{\rightarrow}$  is a subset of  $F_n^{\rightarrow}(X_{(i;t)})$  if sample  
1510  $I(F_N(X_{(i;t+\Delta t)}); F_n^{\rightarrow}(X_{(i;t)})) - I(F_N(X_{(i;t)}); F_n^{\rightarrow}(X_{(i;t)}))$  is significantly greater than zero and if  
1511 the logical implication in the definition (i.e. causality) can be then inferred given the experimental  
1512 design.

1513 **Remark** Note that if  $F_N^{\rightarrow}(X_{(i;t)}) \neq \emptyset$ , then the alleles specified in  $G$  must account for all  
1514 gene products in  $F$  (spatially-specified phenotype) necessary for the facilitated diffusion of the  
1515 molecules specified in  $F_N^{\rightarrow}(X_{(i;t)})$  (e.g. functional and sufficiently abundant protein pores or  
1516 carriers, or intracellular transducers if needed).

1517 **Remark** Nanney's extracellular propagators  $F_N^{\rightarrow}$  may need a certain set of Nanney's intracellular  
1518 propagators (defined with respect to the set  $F - (F^{\star} \cup F_N)$ ) to satisfy their own defining condition.

1519 **Remark** Whereas the existence of Nanney's extracellular propagators  $F_W^{\rightarrow}$  is indisputable [84], to  
1520 my knowledge evidence for the existence of Nanney's extracellular propagators  $F_N^{\rightarrow}$  has not been  
1521 searched for and thus, not surprisingly, is currently absent. However, the appearance of Nanney's  
1522 extracellular propagators  $F_N^{\rightarrow}$  was a necessary condition for the evolution of differentiated  
1523 multicellularity, as it is proposed in the theory.

1524 **Estimation of a lower bound for the necessary cell-fate information**  
 1525 **capacity in the hermaphrodite *Caenorhabditis elegans* ontogeny**

| Count                                 |                                                                            | N <sup>o</sup>           |
|---------------------------------------|----------------------------------------------------------------------------|--------------------------|
| Cells generated                       |                                                                            | 1,090                    |
| Deaths in the process                 |                                                                            | 131                      |
| Final cells                           |                                                                            | 959                      |
| Cell types developed                  |                                                                            | 19                       |
| (Data source: WormAtlas website [85]) |                                                                            |                          |
|                                       | Estimated as                                                               | N <sup>o</sup> (approx.) |
| Total divisions                       | $2^{\log_2(\text{cells\_generated}+1)} - 1$                                | 2,179                    |
| Cell-fate divisions                   | $2^{\log_2(\text{cell\_types}+1)} - 1$                                     | 37                       |
| Non-cell-fate divisions               | $\text{total\_divisions} - (\text{cell\_fate\_divisions} + \text{deaths})$ | 2,011                    |
|                                       | Estimated as                                                               | $p$ $-p \log_2 p$        |
| Cell death                            | $\text{deaths} / \text{total\_divisions}$                                  | 0.060   0.244            |
| 1527 Non-cell-fate division           | $\text{non\_cell\_fate\_divisions} / \text{total\_divisions}$              | 0.923   0.107            |
| Cell-fate division                    | $\text{cell\_fate\_divisions} / \text{total\_divisions}$                   | 0.017   0.1              |
| Uncertainty per division (Sum)        |                                                                            | 0.451                    |
|                                       | Estimated as                                                               | (bit)                    |
| 1528 Uncertainty to resolve (total)   | $\text{uncertainty\_per\_division} \times \text{total\_divisions}$         | 983                      |

1529 Note: germ line cells were excluded from the analysis.

1530 **Supplementary Information**

1531 ***Homo sapiens* source data of ChIP-seq on histone H3 modifications**  
 1532 **(BAM/BAI files) [70]**

1533 For downloading, the URL must be constructed by adding the following prefix to each file listed:

1534

1535 <ftp://hgdownload.cse.ucsc.edu/goldenPath/hg19/encodeDCC/wgEncodeBroadHistone/>

| Cell type | Antibody | GEO Accession | File URL suffix                                         |
|-----------|----------|---------------|---------------------------------------------------------|
| GM12878   | H3K27ac  | GSM733771     | wgEncodeBroadHistoneGm12878H3k27acStdA1nRep1.bam.bai    |
| GM12878   | H3K27ac  | GSM733771     | wgEncodeBroadHistoneGm12878H3k27acStdA1nRep1.bam        |
| GM12878   | H3K27ac  | GSM733771     | wgEncodeBroadHistoneGm12878H3k27acStdA1nRep2.bam.bai    |
| GM12878   | H3K27ac  | GSM733771     | wgEncodeBroadHistoneGm12878H3k27acStdA1nRep2.bam        |
| GM12878   | H3K27me3 | GSM733758     | wgEncodeBroadHistoneGm12878H3k27me3StdA1nRep1.bam.bai   |
| GM12878   | H3K27me3 | GSM733758     | wgEncodeBroadHistoneGm12878H3k27me3StdA1nRep1.bam       |
| GM12878   | H3K27me3 | GSM733758     | wgEncodeBroadHistoneGm12878H3k27me3StdA1nRep2.bam.bai   |
| GM12878   | H3K27me3 | GSM733758     | wgEncodeBroadHistoneGm12878H3k27me3StdA1nRep2.bam       |
| GM12878   | H3K27me3 | GSM733758     | wgEncodeBroadHistoneGm12878H3k27me3StdA1nRep3V2.bam.bai |
| GM12878   | H3K27me3 | GSM733758     | wgEncodeBroadHistoneGm12878H3k27me3StdA1nRep3V2.bam     |
| GM12878   | H3K36me3 | GSM733679     | wgEncodeBroadHistoneGm12878H3k36me3StdA1nRep1.bam.bai   |
| GM12878   | H3K36me3 | GSM733679     | wgEncodeBroadHistoneGm12878H3k36me3StdA1nRep1.bam       |
| GM12878   | H3K36me3 | GSM733679     | wgEncodeBroadHistoneGm12878H3k36me3StdA1nRep2.bam.bai   |
| GM12878   | H3K36me3 | GSM733679     | wgEncodeBroadHistoneGm12878H3k36me3StdA1nRep2.bam       |
| GM12878   | H3K4me1  | GSM733772     | wgEncodeBroadHistoneGm12878H3k4me1StdA1nRep2.bam.bai    |
| GM12878   | H3K4me1  | GSM733772     | wgEncodeBroadHistoneGm12878H3k4me1StdA1nRep2.bam        |
| GM12878   | H3K4me1  | GSM733772     | wgEncodeBroadHistoneGm12878H3k04me1StdA1nRep1V2.bam.bai |
| GM12878   | H3K4me1  | GSM733772     | wgEncodeBroadHistoneGm12878H3k04me1StdA1nRep1V2.bam     |
| GM12878   | H3K4me2  | GSM733769     | wgEncodeBroadHistoneGm12878H3k4me2StdA1nRep1.bam.bai    |
| GM12878   | H3K4me2  | GSM733769     | wgEncodeBroadHistoneGm12878H3k4me2StdA1nRep1.bam        |
| GM12878   | H3K4me2  | GSM733769     | wgEncodeBroadHistoneGm12878H3k4me2StdA1nRep2.bam.bai    |
| GM12878   | H3K4me2  | GSM733769     | wgEncodeBroadHistoneGm12878H3k4me2StdA1nRep2.bam        |
| GM12878   | H3K4me3  | GSM733708     | wgEncodeBroadHistoneGm12878H3k04me3StdA1nRep2V2.bam.bai |
| GM12878   | H3K4me3  | GSM733708     | wgEncodeBroadHistoneGm12878H3k04me3StdA1nRep2V2.bam     |
| GM12878   | H3K4me3  | GSM733708     | wgEncodeBroadHistoneGm12878H3k4me3StdA1nRep1.bam.bai    |
| GM12878   | H3K4me3  | GSM733708     | wgEncodeBroadHistoneGm12878H3k4me3StdA1nRep1.bam        |
| GM12878   | H3K79me2 | GSM733736     | wgEncodeBroadHistoneGm12878H3k79me2StdA1nRep1.bam.bai   |
| GM12878   | H3K79me2 | GSM733736     | wgEncodeBroadHistoneGm12878H3k79me2StdA1nRep1.bam       |
| GM12878   | H3K79me2 | GSM733736     | wgEncodeBroadHistoneGm12878H3k79me2StdA1nRep2.bam.bai   |
| GM12878   | H3K79me2 | GSM733736     | wgEncodeBroadHistoneGm12878H3k79me2StdA1nRep2.bam       |
| GM12878   | H3K9ac   | GSM733677     | wgEncodeBroadHistoneGm12878H3k9acStdA1nRep1.bam.bai     |
| GM12878   | H3K9ac   | GSM733677     | wgEncodeBroadHistoneGm12878H3k9acStdA1nRep1.bam         |
| GM12878   | H3K9ac   | GSM733677     | wgEncodeBroadHistoneGm12878H3k9acStdA1nRep2.bam.bai     |
| GM12878   | H3K9ac   | GSM733677     | wgEncodeBroadHistoneGm12878H3k9acStdA1nRep2.bam         |
| GM12878   | H3K9me3  | GSM733664     | wgEncodeBroadHistoneGm12878H3k9me3StdA1nRep1.bam.bai    |
| GM12878   | H3K9me3  | GSM733664     | wgEncodeBroadHistoneGm12878H3k9me3StdA1nRep1.bam        |
| GM12878   | H3K9me3  | GSM733664     | wgEncodeBroadHistoneGm12878H3k9me3StdA1nRep2.bam.bai    |
| GM12878   | H3K9me3  | GSM733664     | wgEncodeBroadHistoneGm12878H3k9me3StdA1nRep2.bam        |
| GM12878   | H3K9me3  | GSM733664     | wgEncodeBroadHistoneGm12878H3k9me3StdA1nRep3.bam.bai    |
| GM12878   | H3K9me3  | GSM733664     | wgEncodeBroadHistoneGm12878H3k9me3StdA1nRep3.bam        |

Continued on next page

*Continued from previous page*

| Cell type | Antibody | GEO Accession | File URL suffix                                      |
|-----------|----------|---------------|------------------------------------------------------|
| GM12878   | Input    | GSM733742     | wgEncodeBroadHistoneGm12878ControlStdA1nRep1.bam.bai |
| GM12878   | Input    | GSM733742     | wgEncodeBroadHistoneGm12878ControlStdA1nRep1.bam     |
| GM12878   | Input    | GSM733742     | wgEncodeBroadHistoneGm12878ControlStdA1nRep2.bam.bai |
| GM12878   | Input    | GSM733742     | wgEncodeBroadHistoneGm12878ControlStdA1nRep2.bam     |
| H1-hESC   | H3K27ac  | GSM733718     | wgEncodeBroadHistoneH1hescH3k27acStdA1nRep1.bam.bai  |
| H1-hESC   | H3K27ac  | GSM733718     | wgEncodeBroadHistoneH1hescH3k27acStdA1nRep1.bam      |
| H1-hESC   | H3K27ac  | GSM733718     | wgEncodeBroadHistoneH1hescH3k27acStdA1nRep2.bam.bai  |
| H1-hESC   | H3K27ac  | GSM733718     | wgEncodeBroadHistoneH1hescH3k27acStdA1nRep2.bam      |
| H1-hESC   | H3K27me3 | GSM733748     | wgEncodeBroadHistoneH1hescH3k27me3StdA1nRep1.bam.bai |
| H1-hESC   | H3K27me3 | GSM733748     | wgEncodeBroadHistoneH1hescH3k27me3StdA1nRep1.bam     |
| H1-hESC   | H3K27me3 | GSM733748     | wgEncodeBroadHistoneH1hescH3k27me3StdA1nRep2.bam.bai |
| H1-hESC   | H3K27me3 | GSM733748     | wgEncodeBroadHistoneH1hescH3k27me3StdA1nRep2.bam     |
| H1-hESC   | H3K36me3 | GSM733725     | wgEncodeBroadHistoneH1hescH3k36me3StdA1nRep1.bam.bai |
| H1-hESC   | H3K36me3 | GSM733725     | wgEncodeBroadHistoneH1hescH3k36me3StdA1nRep1.bam     |
| H1-hESC   | H3K36me3 | GSM733725     | wgEncodeBroadHistoneH1hescH3k36me3StdA1nRep2.bam.bai |
| H1-hESC   | H3K36me3 | GSM733725     | wgEncodeBroadHistoneH1hescH3k36me3StdA1nRep2.bam     |
| H1-hESC   | H3K4me1  | GSM733782     | wgEncodeBroadHistoneH1hescH3k4me1StdA1nRep1.bam.bai  |
| H1-hESC   | H3K4me1  | GSM733782     | wgEncodeBroadHistoneH1hescH3k4me1StdA1nRep1.bam      |
| H1-hESC   | H3K4me1  | GSM733782     | wgEncodeBroadHistoneH1hescH3k4me1StdA1nRep2.bam.bai  |
| H1-hESC   | H3K4me1  | GSM733782     | wgEncodeBroadHistoneH1hescH3k4me1StdA1nRep2.bam      |
| H1-hESC   | H3K4me2  | GSM733670     | wgEncodeBroadHistoneH1hescH3k4me2StdA1nRep1.bam.bai  |
| H1-hESC   | H3K4me2  | GSM733670     | wgEncodeBroadHistoneH1hescH3k4me2StdA1nRep1.bam      |
| H1-hESC   | H3K4me2  | GSM733670     | wgEncodeBroadHistoneH1hescH3k4me2StdA1nRep2.bam.bai  |
| H1-hESC   | H3K4me2  | GSM733670     | wgEncodeBroadHistoneH1hescH3k4me2StdA1nRep2.bam      |
| H1-hESC   | H3K4me3  | GSM733657     | wgEncodeBroadHistoneH1hescH3k4me3StdA1nRep1.bam.bai  |
| H1-hESC   | H3K4me3  | GSM733657     | wgEncodeBroadHistoneH1hescH3k4me3StdA1nRep1.bam      |
| H1-hESC   | H3K4me3  | GSM733657     | wgEncodeBroadHistoneH1hescH3k4me3StdA1nRep2.bam.bai  |
| H1-hESC   | H3K4me3  | GSM733657     | wgEncodeBroadHistoneH1hescH3k4me3StdA1nRep2.bam      |
| H1-hESC   | H3K79me2 | GSM1003547    | wgEncodeBroadHistoneH1hescH3k79me2StdA1nRep1.bam.bai |
| H1-hESC   | H3K79me2 | GSM1003547    | wgEncodeBroadHistoneH1hescH3k79me2StdA1nRep1.bam     |
| H1-hESC   | H3K79me2 | GSM1003547    | wgEncodeBroadHistoneH1hescH3k79me2StdA1nRep2.bam.bai |
| H1-hESC   | H3K79me2 | GSM1003547    | wgEncodeBroadHistoneH1hescH3k79me2StdA1nRep2.bam     |
| H1-hESC   | H3K9ac   | GSM733773     | wgEncodeBroadHistoneH1hescH3k9acStdA1nRep1.bam.bai   |
| H1-hESC   | H3K9ac   | GSM733773     | wgEncodeBroadHistoneH1hescH3k9acStdA1nRep1.bam       |
| H1-hESC   | H3K9ac   | GSM733773     | wgEncodeBroadHistoneH1hescH3k9acStdA1nRep2.bam.bai   |
| H1-hESC   | H3K9ac   | GSM733773     | wgEncodeBroadHistoneH1hescH3k9acStdA1nRep2.bam       |
| H1-hESC   | H3K9me3  | GSM1003585    | wgEncodeBroadHistoneH1hescH3k09me3StdA1nRep1.bam.bai |
| H1-hESC   | H3K9me3  | GSM1003585    | wgEncodeBroadHistoneH1hescH3k09me3StdA1nRep1.bam     |
| H1-hESC   | H3K9me3  | GSM1003585    | wgEncodeBroadHistoneH1hescH3k09me3StdA1nRep2.bam.bai |
| H1-hESC   | H3K9me3  | GSM1003585    | wgEncodeBroadHistoneH1hescH3k09me3StdA1nRep2.bam     |
| H1-hESC   | Input    | GSM733770     | wgEncodeBroadHistoneH1hescControlStdA1nRep1.bam.bai  |
| H1-hESC   | Input    | GSM733770     | wgEncodeBroadHistoneH1hescControlStdA1nRep1.bam      |
| H1-hESC   | Input    | GSM733770     | wgEncodeBroadHistoneH1hescControlStdA1nRep2.bam.bai  |
| H1-hESC   | Input    | GSM733770     | wgEncodeBroadHistoneH1hescControlStdA1nRep2.bam      |
| HSM       | H3K27ac  | GSM733755     | wgEncodeBroadHistoneHsmmH3k27acStdA1nRep1.bam.bai    |
| HSM       | H3K27ac  | GSM733755     | wgEncodeBroadHistoneHsmmH3k27acStdA1nRep1.bam        |
| HSM       | H3K27ac  | GSM733755     | wgEncodeBroadHistoneHsmmH3k27acStdA1nRep2.bam.bai    |
| HSM       | H3K27ac  | GSM733755     | wgEncodeBroadHistoneHsmmH3k27acStdA1nRep2.bam        |
| HSM       | H3K27me3 | GSM733667     | wgEncodeBroadHistoneHsmmH3k27me3StdA1nRep1.bam.bai   |
| HSM       | H3K27me3 | GSM733667     | wgEncodeBroadHistoneHsmmH3k27me3StdA1nRep1.bam       |
| HSM       | H3K27me3 | GSM733667     | wgEncodeBroadHistoneHsmmH3k27me3StdA1nRep2.bam.bai   |

*Continued on next page*

*Continued from previous page*

| Cell type | Antibody | GEO Accession | File URL suffix                                     |
|-----------|----------|---------------|-----------------------------------------------------|
| HSMM      | H3K27me3 | GSM733667     | wgEncodeBroadHistoneHsmmH3k27me3StdA1nRep2.bam      |
| HSMM      | H3K36me3 | GSM733702     | wgEncodeBroadHistoneHsmmH3k36me3StdA1nRep1.bam.bai  |
| HSMM      | H3K36me3 | GSM733702     | wgEncodeBroadHistoneHsmmH3k36me3StdA1nRep1.bam      |
| HSMM      | H3K36me3 | GSM733702     | wgEncodeBroadHistoneHsmmH3k36me3StdA1nRep2.bam.bai  |
| HSMM      | H3K36me3 | GSM733702     | wgEncodeBroadHistoneHsmmH3k36me3StdA1nRep2.bam      |
| HSMM      | H3K4me1  | GSM733761     | wgEncodeBroadHistoneHsmmH3k4me1StdA1nRep1.bam.bai   |
| HSMM      | H3K4me1  | GSM733761     | wgEncodeBroadHistoneHsmmH3k4me1StdA1nRep1.bam       |
| HSMM      | H3K4me1  | GSM733761     | wgEncodeBroadHistoneHsmmH3k4me1StdA1nRep2.bam.bai   |
| HSMM      | H3K4me1  | GSM733761     | wgEncodeBroadHistoneHsmmH3k4me1StdA1nRep2.bam       |
| HSMM      | H3K4me2  | GSM733768     | wgEncodeBroadHistoneHsmmH3k4me2StdA1nRep1.bam.bai   |
| HSMM      | H3K4me2  | GSM733768     | wgEncodeBroadHistoneHsmmH3k4me2StdA1nRep1.bam       |
| HSMM      | H3K4me2  | GSM733768     | wgEncodeBroadHistoneHsmmH3k4me2StdA1nRep2.bam.bai   |
| HSMM      | H3K4me2  | GSM733768     | wgEncodeBroadHistoneHsmmH3k4me2StdA1nRep2.bam       |
| HSMM      | H3K4me3  | GSM733637     | wgEncodeBroadHistoneHsmmH3k4me3StdA1nRep1.bam.bai   |
| HSMM      | H3K4me3  | GSM733637     | wgEncodeBroadHistoneHsmmH3k4me3StdA1nRep1.bam       |
| HSMM      | H3K4me3  | GSM733637     | wgEncodeBroadHistoneHsmmH3k4me3StdA1nRep2.bam.bai   |
| HSMM      | H3K4me3  | GSM733637     | wgEncodeBroadHistoneHsmmH3k4me3StdA1nRep2.bam       |
| HSMM      | H3K79me2 | GSM733741     | wgEncodeBroadHistoneHsmmH3k79me2StdA1nRep1.bam.bai  |
| HSMM      | H3K79me2 | GSM733741     | wgEncodeBroadHistoneHsmmH3k79me2StdA1nRep1.bam      |
| HSMM      | H3K79me2 | GSM733741     | wgEncodeBroadHistoneHsmmH3k79me2StdA1nRep2.bam.bai  |
| HSMM      | H3K79me2 | GSM733741     | wgEncodeBroadHistoneHsmmH3k79me2StdA1nRep2.bam      |
| HSMM      | H3K9ac   | GSM733775     | wgEncodeBroadHistoneHsmmH3k9acStdA1nRep1.bam.bai    |
| HSMM      | H3K9ac   | GSM733775     | wgEncodeBroadHistoneHsmmH3k9acStdA1nRep1.bam        |
| HSMM      | H3K9ac   | GSM733775     | wgEncodeBroadHistoneHsmmH3k9acStdA1nRep2.bam.bai    |
| HSMM      | H3K9ac   | GSM733775     | wgEncodeBroadHistoneHsmmH3k9acStdA1nRep2.bam        |
| HSMM      | H3K9me3  | GSM733730     | wgEncodeBroadHistoneHsmmH3k9me3StdA1nRep1.bam.bai   |
| HSMM      | H3K9me3  | GSM733730     | wgEncodeBroadHistoneHsmmH3k9me3StdA1nRep1.bam       |
| HSMM      | H3K9me3  | GSM733730     | wgEncodeBroadHistoneHsmmH3k9me3StdA1nRep2.bam.bai   |
| HSMM      | H3K9me3  | GSM733730     | wgEncodeBroadHistoneHsmmH3k9me3StdA1nRep2.bam       |
| HSMM      | Input    | GSM733663     | wgEncodeBroadHistoneHsmmControlStdA1nRep1.bam.bai   |
| HSMM      | Input    | GSM733663     | wgEncodeBroadHistoneHsmmControlStdA1nRep1.bam       |
| HSMM      | Input    | GSM733663     | wgEncodeBroadHistoneHsmmControlStdA1nRep2.bam.bai   |
| HSMM      | Input    | GSM733663     | wgEncodeBroadHistoneHsmmControlStdA1nRep2.bam       |
| HUVEC     | H3K27ac  | GSM733691     | wgEncodeBroadHistoneHuvecH3k27acStdA1nRep1.bam.bai  |
| HUVEC     | H3K27ac  | GSM733691     | wgEncodeBroadHistoneHuvecH3k27acStdA1nRep1.bam      |
| HUVEC     | H3K27ac  | GSM733691     | wgEncodeBroadHistoneHuvecH3k27acStdA1nRep2.bam.bai  |
| HUVEC     | H3K27ac  | GSM733691     | wgEncodeBroadHistoneHuvecH3k27acStdA1nRep2.bam      |
| HUVEC     | H3K27ac  | GSM733691     | wgEncodeBroadHistoneHuvecH3k27acStdA1nRep3.bam.bai  |
| HUVEC     | H3K27ac  | GSM733691     | wgEncodeBroadHistoneHuvecH3k27acStdA1nRep3.bam      |
| HUVEC     | H3K27me3 | GSM733688     | wgEncodeBroadHistoneHuvecH3k27me3StdA1nRep1.bam.bai |
| HUVEC     | H3K27me3 | GSM733688     | wgEncodeBroadHistoneHuvecH3k27me3StdA1nRep1.bam     |
| HUVEC     | H3K27me3 | GSM733688     | wgEncodeBroadHistoneHuvecH3k27me3StdA1nRep2.bam.bai |
| HUVEC     | H3K27me3 | GSM733688     | wgEncodeBroadHistoneHuvecH3k27me3StdA1nRep2.bam     |
| HUVEC     | H3K36me3 | GSM733757     | wgEncodeBroadHistoneHuvecH3k36me3StdA1nRep1.bam.bai |
| HUVEC     | H3K36me3 | GSM733757     | wgEncodeBroadHistoneHuvecH3k36me3StdA1nRep1.bam     |
| HUVEC     | H3K36me3 | GSM733757     | wgEncodeBroadHistoneHuvecH3k36me3StdA1nRep2.bam.bai |
| HUVEC     | H3K36me3 | GSM733757     | wgEncodeBroadHistoneHuvecH3k36me3StdA1nRep2.bam     |
| HUVEC     | H3K36me3 | GSM733757     | wgEncodeBroadHistoneHuvecH3k36me3StdA1nRep3.bam.bai |
| HUVEC     | H3K36me3 | GSM733757     | wgEncodeBroadHistoneHuvecH3k36me3StdA1nRep3.bam     |
| HUVEC     | H3K4me1  | GSM733690     | wgEncodeBroadHistoneHuvecH3k4me1StdA1nRep1.bam.bai  |
| HUVEC     | H3K4me1  | GSM733690     | wgEncodeBroadHistoneHuvecH3k4me1StdA1nRep1.bam      |

*Continued on next page*



*Continued from previous page*

| Cell type | Antibody | GEO Accession | File URL suffix                                    |
|-----------|----------|---------------|----------------------------------------------------|
| HUVEC     | H3K4me1  | GSM733690     | wgEncodeBroadHistoneHuvecH3k4me1StdA1nRep2.bam.bai |
| HUVEC     | H3K4me1  | GSM733690     | wgEncodeBroadHistoneHuvecH3k4me1StdA1nRep2.bam     |
| HUVEC     | H3K4me1  | GSM733690     | wgEncodeBroadHistoneHuvecH3k4me1StdA1nRep3.bam.bai |
| HUVEC     | H3K4me1  | GSM733690     | wgEncodeBroadHistoneHuvecH3k4me1StdA1nRep3.bam     |
| HUVEC     | H3K4me2  | GSM733683     | wgEncodeBroadHistoneHuvecH3k4me2StdA1nRep1.bam.bai |
| HUVEC     | H3K4me2  | GSM733683     | wgEncodeBroadHistoneHuvecH3k4me2StdA1nRep1.bam     |
| HUVEC     | H3K4me2  | GSM733683     | wgEncodeBroadHistoneHuvecH3k4me2StdA1nRep2.bam.bai |
| HUVEC     | H3K4me2  | GSM733683     | wgEncodeBroadHistoneHuvecH3k4me2StdA1nRep2.bam     |
| HUVEC     | H3K4me3  | GSM733673     | wgEncodeBroadHistoneHuvecH3k4me3StdA1nRep1.bam.bai |
| HUVEC     | H3K4me3  | GSM733673     | wgEncodeBroadHistoneHuvecH3k4me3StdA1nRep1.bam     |
| HUVEC     | H3K4me3  | GSM733673     | wgEncodeBroadHistoneHuvecH3k4me3StdA1nRep2.bam.bai |
| HUVEC     | H3K4me3  | GSM733673     | wgEncodeBroadHistoneHuvecH3k4me3StdA1nRep2.bam     |
| HUVEC     | H3K4me3  | GSM733673     | wgEncodeBroadHistoneHuvecH3k4me3StdA1nRep3.bam.bai |
| HUVEC     | H3K4me3  | GSM733673     | wgEncodeBroadHistoneHuvecH3k4me3StdA1nRep3.bam     |
| HUVEC     | H3K79me2 | GSM1003555    | wgEncodeBroadHistoneHuvecH3k79me2A1nRep1.bam.bai   |
| HUVEC     | H3K79me2 | GSM1003555    | wgEncodeBroadHistoneHuvecH3k79me2A1nRep1.bam       |
| HUVEC     | H3K79me2 | GSM1003555    | wgEncodeBroadHistoneHuvecH3k79me2A1nRep2.bam.bai   |
| HUVEC     | H3K79me2 | GSM1003555    | wgEncodeBroadHistoneHuvecH3k79me2A1nRep2.bam       |
| HUVEC     | H3K9ac   | GSM733735     | wgEncodeBroadHistoneHuvecH3k9acStdA1nRep1.bam.bai  |
| HUVEC     | H3K9ac   | GSM733735     | wgEncodeBroadHistoneHuvecH3k9acStdA1nRep1.bam      |
| HUVEC     | H3K9ac   | GSM733735     | wgEncodeBroadHistoneHuvecH3k9acStdA1nRep2.bam.bai  |
| HUVEC     | H3K9ac   | GSM733735     | wgEncodeBroadHistoneHuvecH3k9acStdA1nRep2.bam      |
| HUVEC     | H3K9ac   | GSM733735     | wgEncodeBroadHistoneHuvecH3k9acStdA1nRep3.bam.bai  |
| HUVEC     | H3K9ac   | GSM733735     | wgEncodeBroadHistoneHuvecH3k9acStdA1nRep3.bam      |
| HUVEC     | H3K9me3  | GSM1003517    | wgEncodeBroadHistoneHuvecH3k09me3A1nRep1.bam.bai   |
| HUVEC     | H3K9me3  | GSM1003517    | wgEncodeBroadHistoneHuvecH3k09me3A1nRep1.bam       |
| HUVEC     | H3K9me3  | GSM1003517    | wgEncodeBroadHistoneHuvecH3k09me3A1nRep2.bam.bai   |
| HUVEC     | H3K9me3  | GSM1003517    | wgEncodeBroadHistoneHuvecH3k09me3A1nRep2.bam       |
| HUVEC     | Input    | GSM733715     | wgEncodeBroadHistoneHuvecControlStdA1nRep1.bam.bai |
| HUVEC     | Input    | GSM733715     | wgEncodeBroadHistoneHuvecControlStdA1nRep1.bam     |
| HUVEC     | Input    | GSM733715     | wgEncodeBroadHistoneHuvecControlStdA1nRep2.bam.bai |
| HUVEC     | Input    | GSM733715     | wgEncodeBroadHistoneHuvecControlStdA1nRep2.bam     |
| HUVEC     | Input    | GSM733715     | wgEncodeBroadHistoneHuvecControlStdA1nRep3.bam.bai |
| HUVEC     | Input    | GSM733715     | wgEncodeBroadHistoneHuvecControlStdA1nRep3.bam     |
| NHEK      | H3K27ac  | GSM733674     | wgEncodeBroadHistoneNhekH3k27acStdA1nRep1.bam.bai  |
| NHEK      | H3K27ac  | GSM733674     | wgEncodeBroadHistoneNhekH3k27acStdA1nRep1.bam      |
| NHEK      | H3K27ac  | GSM733674     | wgEncodeBroadHistoneNhekH3k27acStdA1nRep2.bam.bai  |
| NHEK      | H3K27ac  | GSM733674     | wgEncodeBroadHistoneNhekH3k27acStdA1nRep2.bam      |
| NHEK      | H3K27ac  | GSM733674     | wgEncodeBroadHistoneNhekH3k27acStdA1nRep3.bam.bai  |
| NHEK      | H3K27ac  | GSM733674     | wgEncodeBroadHistoneNhekH3k27acStdA1nRep3.bam      |
| NHEK      | H3K27me3 | GSM733701     | wgEncodeBroadHistoneNhekH3k27me3StdA1nRep1.bam.bai |
| NHEK      | H3K27me3 | GSM733701     | wgEncodeBroadHistoneNhekH3k27me3StdA1nRep1.bam     |
| NHEK      | H3K27me3 | GSM733701     | wgEncodeBroadHistoneNhekH3k27me3StdA1nRep2.bam.bai |
| NHEK      | H3K27me3 | GSM733701     | wgEncodeBroadHistoneNhekH3k27me3StdA1nRep2.bam     |
| NHEK      | H3K27me3 | GSM733701     | wgEncodeBroadHistoneNhekH3k27me3StdA1nRep3.bam.bai |
| NHEK      | H3K27me3 | GSM733701     | wgEncodeBroadHistoneNhekH3k27me3StdA1nRep3.bam     |
| NHEK      | H3K36me3 | GSM733726     | wgEncodeBroadHistoneNhekH3k36me3StdA1nRep1.bam.bai |
| NHEK      | H3K36me3 | GSM733726     | wgEncodeBroadHistoneNhekH3k36me3StdA1nRep1.bam     |
| NHEK      | H3K36me3 | GSM733726     | wgEncodeBroadHistoneNhekH3k36me3StdA1nRep2.bam.bai |
| NHEK      | H3K36me3 | GSM733726     | wgEncodeBroadHistoneNhekH3k36me3StdA1nRep2.bam     |
| NHEK      | H3K36me3 | GSM733726     | wgEncodeBroadHistoneNhekH3k36me3StdA1nRep3.bam.bai |
| NHEK      | H3K36me3 | GSM733726     | wgEncodeBroadHistoneNhekH3k36me3StdA1nRep3.bam     |

*Continued on next page*



*Continued from previous page*

| Cell type | Antibody | GEO Accession | File URL suffix                                     |
|-----------|----------|---------------|-----------------------------------------------------|
| NHEK      | H3K36me3 | GSM733726     | wgEncodeBroadHistoneNhekH3k36me3StdA1nRep3.bam      |
| NHEK      | H3K4me1  | GSM733698     | wgEncodeBroadHistoneNhekH3k4me1StdA1nRep1.bam.bai   |
| NHEK      | H3K4me1  | GSM733698     | wgEncodeBroadHistoneNhekH3k4me1StdA1nRep1.bam       |
| NHEK      | H3K4me1  | GSM733698     | wgEncodeBroadHistoneNhekH3k4me1StdA1nRep2.bam.bai   |
| NHEK      | H3K4me1  | GSM733698     | wgEncodeBroadHistoneNhekH3k4me1StdA1nRep2.bam       |
| NHEK      | H3K4me1  | GSM733698     | wgEncodeBroadHistoneNhekH3k4me1StdA1nRep3.bam.bai   |
| NHEK      | H3K4me1  | GSM733698     | wgEncodeBroadHistoneNhekH3k4me1StdA1nRep3.bam       |
| NHEK      | H3K4me2  | GSM733686     | wgEncodeBroadHistoneNhekH3k4me2StdA1nRep1.bam.bai   |
| NHEK      | H3K4me2  | GSM733686     | wgEncodeBroadHistoneNhekH3k4me2StdA1nRep1.bam       |
| NHEK      | H3K4me2  | GSM733686     | wgEncodeBroadHistoneNhekH3k4me2StdA1nRep2.bam.bai   |
| NHEK      | H3K4me2  | GSM733686     | wgEncodeBroadHistoneNhekH3k4me2StdA1nRep2.bam       |
| NHEK      | H3K4me2  | GSM733686     | wgEncodeBroadHistoneNhekH3k4me2StdA1nRep3.bam.bai   |
| NHEK      | H3K4me2  | GSM733686     | wgEncodeBroadHistoneNhekH3k4me2StdA1nRep3.bam       |
| NHEK      | H3K4me3  | GSM733720     | wgEncodeBroadHistoneNhekH3k4me3StdA1nRep1.bam.bai   |
| NHEK      | H3K4me3  | GSM733720     | wgEncodeBroadHistoneNhekH3k4me3StdA1nRep1.bam       |
| NHEK      | H3K4me3  | GSM733720     | wgEncodeBroadHistoneNhekH3k4me3StdA1nRep2.bam.bai   |
| NHEK      | H3K4me3  | GSM733720     | wgEncodeBroadHistoneNhekH3k4me3StdA1nRep2.bam       |
| NHEK      | H3K4me3  | GSM733720     | wgEncodeBroadHistoneNhekH3k4me3StdA1nRep3.bam.bai   |
| NHEK      | H3K4me3  | GSM733720     | wgEncodeBroadHistoneNhekH3k4me3StdA1nRep3.bam       |
| NHEK      | H3K79me2 | GSM1003527    | wgEncodeBroadHistoneNhekH3k79me2A1nRep1.bam.bai     |
| NHEK      | H3K79me2 | GSM1003527    | wgEncodeBroadHistoneNhekH3k79me2A1nRep1.bam         |
| NHEK      | H3K79me2 | GSM1003527    | wgEncodeBroadHistoneNhekH3k79me2A1nRep2.bam.bai     |
| NHEK      | H3K79me2 | GSM1003527    | wgEncodeBroadHistoneNhekH3k79me2A1nRep2.bam         |
| NHEK      | H3K9ac   | GSM733665     | wgEncodeBroadHistoneNhekH3k9acStdA1nRep1.bam.bai    |
| NHEK      | H3K9ac   | GSM733665     | wgEncodeBroadHistoneNhekH3k9acStdA1nRep1.bam        |
| NHEK      | H3K9ac   | GSM733665     | wgEncodeBroadHistoneNhekH3k9acStdA1nRep2.bam.bai    |
| NHEK      | H3K9ac   | GSM733665     | wgEncodeBroadHistoneNhekH3k9acStdA1nRep2.bam        |
| NHEK      | H3K9ac   | GSM733665     | wgEncodeBroadHistoneNhekH3k9acStdA1nRep3.bam.bai    |
| NHEK      | H3K9ac   | GSM733665     | wgEncodeBroadHistoneNhekH3k9acStdA1nRep3.bam        |
| NHEK      | H3K9me3  | GSM1003528    | wgEncodeBroadHistoneNhekH3k09me3A1nRep1.bam.bai     |
| NHEK      | H3K9me3  | GSM1003528    | wgEncodeBroadHistoneNhekH3k09me3A1nRep1.bam         |
| NHEK      | H3K9me3  | GSM1003528    | wgEncodeBroadHistoneNhekH3k09me3A1nRep2.bam.bai     |
| NHEK      | H3K9me3  | GSM1003528    | wgEncodeBroadHistoneNhekH3k09me3A1nRep2.bam         |
| NHEK      | Input    | GSM733740     | wgEncodeBroadHistoneNhekControlStdA1nRep1.bam.bai   |
| NHEK      | Input    | GSM733740     | wgEncodeBroadHistoneNhekControlStdA1nRep1.bam       |
| NHEK      | Input    | GSM733740     | wgEncodeBroadHistoneNhekControlStdA1nRep2.bam.bai   |
| NHEK      | Input    | GSM733740     | wgEncodeBroadHistoneNhekControlStdA1nRep2.bam       |
| NHLF      | H3K27ac  | GSM733646     | wgEncodeBroadHistoneNhl1fH3k27acStdA1nRep1.bam.bai  |
| NHLF      | H3K27ac  | GSM733646     | wgEncodeBroadHistoneNhl1fH3k27acStdA1nRep1.bam      |
| NHLF      | H3K27ac  | GSM733646     | wgEncodeBroadHistoneNhl1fH3k27acStdA1nRep2.bam.bai  |
| NHLF      | H3K27ac  | GSM733646     | wgEncodeBroadHistoneNhl1fH3k27acStdA1nRep2.bam      |
| NHLF      | H3K27me3 | GSM733764     | wgEncodeBroadHistoneNhl1fH3k27me3StdA1nRep1.bam.bai |
| NHLF      | H3K27me3 | GSM733764     | wgEncodeBroadHistoneNhl1fH3k27me3StdA1nRep1.bam     |
| NHLF      | H3K27me3 | GSM733764     | wgEncodeBroadHistoneNhl1fH3k27me3StdA1nRep2.bam.bai |
| NHLF      | H3K27me3 | GSM733764     | wgEncodeBroadHistoneNhl1fH3k27me3StdA1nRep2.bam     |
| NHLF      | H3K36me3 | GSM733699     | wgEncodeBroadHistoneNhl1fH3k36me3StdA1nRep1.bam.bai |
| NHLF      | H3K36me3 | GSM733699     | wgEncodeBroadHistoneNhl1fH3k36me3StdA1nRep1.bam     |
| NHLF      | H3K36me3 | GSM733699     | wgEncodeBroadHistoneNhl1fH3k36me3StdA1nRep2.bam.bai |
| NHLF      | H3K36me3 | GSM733699     | wgEncodeBroadHistoneNhl1fH3k36me3StdA1nRep2.bam     |
| NHLF      | H3K4me1  | GSM733649     | wgEncodeBroadHistoneNhl1fH3k4me1StdA1nRep1.bam.bai  |
| NHLF      | H3K4me1  | GSM733649     | wgEncodeBroadHistoneNhl1fH3k4me1StdA1nRep1.bam      |

*Continued on next page*

*Continued from previous page*

| Cell type | Antibody | GEO Accession | File URL suffix                                   |
|-----------|----------|---------------|---------------------------------------------------|
| NHLF      | H3K4me1  | GSM733649     | wgEncodeBroadHistoneNhlFh3k4me1StdA1nRep2.bam.bai |
| NHLF      | H3K4me1  | GSM733649     | wgEncodeBroadHistoneNhlFh3k4me1StdA1nRep2.bam     |
| NHLF      | H3K4me2  | GSM733781     | wgEncodeBroadHistoneNhlFh3k4me2StdA1nRep1.bam.bai |
| NHLF      | H3K4me2  | GSM733781     | wgEncodeBroadHistoneNhlFh3k4me2StdA1nRep1.bam     |
| NHLF      | H3K4me2  | GSM733781     | wgEncodeBroadHistoneNhlFh3k4me2StdA1nRep2.bam.bai |
| NHLF      | H3K4me2  | GSM733781     | wgEncodeBroadHistoneNhlFh3k4me2StdA1nRep2.bam     |
| NHLF      | H3K4me3  | GSM733723     | wgEncodeBroadHistoneNhlFh3k4me3StdA1nRep1.bam.bai |
| NHLF      | H3K4me3  | GSM733723     | wgEncodeBroadHistoneNhlFh3k4me3StdA1nRep1.bam     |
| NHLF      | H3K4me3  | GSM733723     | wgEncodeBroadHistoneNhlFh3k4me3StdA1nRep2.bam.bai |
| NHLF      | H3K4me3  | GSM733723     | wgEncodeBroadHistoneNhlFh3k4me3StdA1nRep2.bam     |
| NHLF      | H3K79me2 | GSM1003549    | wgEncodeBroadHistoneNhlFh3k79me2A1nRep1.bam.bai   |
| NHLF      | H3K79me2 | GSM1003549    | wgEncodeBroadHistoneNhlFh3k79me2A1nRep1.bam       |
| NHLF      | H3K79me2 | GSM1003549    | wgEncodeBroadHistoneNhlFh3k79me2A1nRep2.bam.bai   |
| NHLF      | H3K79me2 | GSM1003549    | wgEncodeBroadHistoneNhlFh3k79me2A1nRep2.bam       |
| NHLF      | H3K9ac   | GSM733652     | wgEncodeBroadHistoneNhlFh3k9acStdA1nRep1.bam.bai  |
| NHLF      | H3K9ac   | GSM733652     | wgEncodeBroadHistoneNhlFh3k9acStdA1nRep1.bam      |
| NHLF      | H3K9ac   | GSM733652     | wgEncodeBroadHistoneNhlFh3k9acStdA1nRep2.bam.bai  |
| NHLF      | H3K9ac   | GSM733652     | wgEncodeBroadHistoneNhlFh3k9acStdA1nRep2.bam      |
| NHLF      | H3K9me3  | GSM1003531    | wgEncodeBroadHistoneNhlFh3k09me3A1nRep1.bam.bai   |
| NHLF      | H3K9me3  | GSM1003531    | wgEncodeBroadHistoneNhlFh3k09me3A1nRep1.bam       |
| NHLF      | H3K9me3  | GSM1003531    | wgEncodeBroadHistoneNhlFh3k09me3A1nRep2.bam.bai   |
| NHLF      | H3K9me3  | GSM1003531    | wgEncodeBroadHistoneNhlFh3k09me3A1nRep2.bam       |
| NHLF      | Input    | GSM733731     | wgEncodeBroadHistoneNhlFcontrolStdA1nRep1.bam.bai |
| NHLF      | Input    | GSM733731     | wgEncodeBroadHistoneNhlFcontrolStdA1nRep1.bam     |
| NHLF      | Input    | GSM733731     | wgEncodeBroadHistoneNhlFcontrolStdA1nRep2.bam.bai |
| NHLF      | Input    | GSM733731     | wgEncodeBroadHistoneNhlFcontrolStdA1nRep2.bam     |

1536

1537 ***Homo sapiens* source data of RNA-seq transcript abundance in FPKM**  
 1538 **(GTF files) [74]**

1539 For downloading, the URL must be constructed by adding the following prefix to each file listed:

1540

1541 <ftp://hgdownload.cse.ucsc.edu/goldenPath/hg19/encodeDCC/wgEncodeCaltechRnaSeq/>

| Cell type | GEO Accession | File URL suffix                                        |
|-----------|---------------|--------------------------------------------------------|
| GM12878   | GSM958728     | wgEncodeCaltechRnaSeqGm12878R2x75I1200TSSRep1V3.gtf.gz |
| GM12878   | GSM958728     | wgEncodeCaltechRnaSeqGm12878R2x75I1200TSSRep2V3.gtf.gz |
| H1-hESC   | GSM958733     | wgEncodeCaltechRnaSeqH1hescR2x75I1200TSSRep1V3.gtf.gz  |
| H1-hESC   | GSM958733     | wgEncodeCaltechRnaSeqH1hescR2x75I1200TSSRep2V3.gtf.gz  |
| H1-hESC   | GSM958733     | wgEncodeCaltechRnaSeqH1hescR2x75I1200TSSRep3V3.gtf.gz  |
| H1-hESC   | GSM958733     | wgEncodeCaltechRnaSeqH1hescR2x75I1200TSSRep4V3.gtf.gz  |
| HSMM      | GSM958744     | wgEncodeCaltechRnaSeqHsmmR2x75I1200TSSRep1V3.gtf.gz    |
| HSMM      | GSM958744     | wgEncodeCaltechRnaSeqHsmmR2x75I1200TSSRep2V3.gtf.gz    |
| HUVEC     | GSM958734     | wgEncodeCaltechRnaSeqHuvecR2x75I1200TSSRep1V3.gtf.gz   |
| HUVEC     | GSM958734     | wgEncodeCaltechRnaSeqHuvecR2x75I1200TSSRep2V3.gtf.gz   |
| NHEK      | GSM958736     | wgEncodeCaltechRnaSeqNhekR2x75I1200TSSRep1V3.gtf.gz    |

*Continued on next page*

*Continued from previous page*

| Cell type | GEO Accession | File URL suffix                                     |
|-----------|---------------|-----------------------------------------------------|
| NHEK      | GSM958736     | wgEncodeCa1techRnaSeqNhekR2x75I1200TSSRep2V3.gtf.gz |
| NHLF      | GSM958746     | wgEncodeCa1techRnaSeqNh1fR2x75I1200TSSRep1V3.gtf.gz |
| NHLF      | GSM958746     | wgEncodeCa1techRnaSeqNh1fR2x75I1200TSSRep2V3.gtf.gz |

1542

1543 ***Mus musculus* source data of ChIP-seq on histone H3 modifications (SRA**  
 1544 **files) [75, 73]**

1545 For downloading, the URL must be constructed by adding the following prefix to each file listed:

1546

1547 `ftp://ftp-trace.ncbi.nlm.nih.gov/sra/sra-instant/reads/ByRun/sra/SRR/`

| Cell type       | Antibody | Rep # | GEO Accession | File URL suffix                |
|-----------------|----------|-------|---------------|--------------------------------|
| E14             | IgG      | 1     | GSM881345     | SRR414/SRR414932/SRR414932.sra |
| E14-day0        | H3K27ac  | 1     | GSM881349     | SRR414/SRR414936/SRR414936.sra |
| E14-day0        | H3K27me3 | 1     | GSM881350     | SRR414/SRR414937/SRR414937.sra |
| E14-day0        | H3K36me3 | 1     | GSM881351     | SRR414/SRR414938/SRR414938.sra |
| E14-day0        | H3K4me1  | 1     | GSM881352     | SRR414/SRR414939/SRR414939.sra |
| E14-day0        | H3K4me3  | 1     | GSM881354     | SRR414/SRR414941/SRR414941.sra |
| E14-day4        | H3K27ac  | 1     | GSM881357     | SRR414/SRR414945/SRR414945.sra |
| E14-day4        | H3K27me3 | 1     | GSM881358     | SRR414/SRR414946/SRR414946.sra |
| E14-day4        | H3K36me3 | 1     | GSM881359     | SRR414/SRR414947/SRR414947.sra |
| E14-day4        | H3K4me1  | 1     | GSM881360     | SRR414/SRR414948/SRR414948.sra |
| E14-day4        | H3K4me3  | 1     | GSM881362     | SRR414/SRR414950/SRR414950.sra |
| E14-day6        | H3K27ac  | 1     | GSM881366     | SRR414/SRR414955/SRR414955.sra |
| E14-day6        | H3K27me3 | 1     | GSM881367     | SRR414/SRR414956/SRR414956.sra |
| E14-day6        | H3K36me3 | 1     | GSM881368     | SRR414/SRR414957/SRR414957.sra |
| E14-day6        | H3K4me1  | 1     | GSM881369     | SRR414/SRR414958/SRR414958.sra |
| E14-day6        | H3K4me3  | 1     | GSM881371     | SRR414/SRR414960/SRR414960.sra |
| Heart (8 wks/o) | H3K27ac  | 1     | GSM1000093    | SRR566/SRR566827/SRR566827.sra |
| Heart (8 wks/o) | H3K27ac  | 2     | GSM1000093    | SRR566/SRR566828/SRR566828.sra |
| Heart (8 wks/o) | H3K27me3 | 1     | GSM1000131    | SRR566/SRR566903/SRR566903.sra |
| Heart (8 wks/o) | H3K27me3 | 2     | GSM1000131    | SRR566/SRR566904/SRR566904.sra |
| Heart (8 wks/o) | H3K36me3 | 1     | GSM1000130    | SRR566/SRR566901/SRR566901.sra |
| Heart (8 wks/o) | H3K36me3 | 2     | GSM1000130    | SRR566/SRR566902/SRR566902.sra |
| Heart (8 wks/o) | H3K4me1  | 1     | GSM769025     | SRR317/SRR317255/SRR317255.sra |
| Heart (8 wks/o) | H3K4me1  | 2     | GSM769025     | SRR317/SRR317256/SRR317256.sra |
| Heart (8 wks/o) | H3K4me3  | 1     | GSM769017     | SRR317/SRR317239/SRR317239.sra |
| Heart (8 wks/o) | H3K4me3  | 2     | GSM769017     | SRR317/SRR317240/SRR317240.sra |
| Heart (8 wks/o) | Input    | 1     | GSM769032     | SRR317/SRR317269/SRR317269.sra |
| Heart (8 wks/o) | Input    | 2     | GSM769032     | SRR317/SRR317270/SRR317270.sra |
| Liver (8 wks/o) | H3K27ac  | 1     | GSM1000140    | SRR566/SRR566921/SRR566921.sra |
| Liver (8 wks/o) | H3K27ac  | 2     | GSM1000140    | SRR566/SRR566922/SRR566922.sra |
| Liver (8 wks/o) | H3K27me3 | 1     | GSM1000150    | SRR566/SRR566941/SRR566941.sra |
| Liver (8 wks/o) | H3K27me3 | 2     | GSM1000150    | SRR566/SRR566942/SRR566942.sra |
| Liver (8 wks/o) | H3K36me3 | 1     | GSM1000151    | SRR566/SRR566943/SRR566943.sra |
| Liver (8 wks/o) | H3K36me3 | 2     | GSM1000151    | SRR566/SRR566944/SRR566944.sra |

*Continued on next page*

Continued from previous page

| Cell type       | Antibody | Rep # | GEO Accession | File URL suffix                |
|-----------------|----------|-------|---------------|--------------------------------|
| Liver (8 wks/o) | H3K4me1  | 1     | GSM769015     | SRR317/SRR317235/SRR317235.sra |
| Liver (8 wks/o) | H3K4me1  | 2     | GSM769015     | SRR317/SRR317236/SRR317236.sra |
| Liver (8 wks/o) | H3K4me3  | 1     | GSM769014     | SRR317/SRR317233/SRR317233.sra |
| Liver (8 wks/o) | H3K4me3  | 2     | GSM769014     | SRR317/SRR317234/SRR317234.sra |
| Liver (8 wks/o) | Input    | 1     | GSM769034     | SRR317/SRR317273/SRR317273.sra |
| Liver (8 wks/o) | Input    | 2     | GSM769034     | SRR317/SRR317274/SRR317274.sra |

1548

1549 ***Mus musculus* source data of RNA-seq (BAM files) [75, 73]**

1550 For downloading, the URL must be constructed by adding one of the two following prefixes to  
1551 each file listed:

- 1552 1. <ftp://ftp.ncbi.nlm.nih.gov/geo/samples/GSM881nnn/>  
1553 2. <ftp://hgdownload.cse.ucsc.edu/goldenPath/mm9/encodeDCC/wgEncodeLicrRnaSeq/>

| Cell type       | Rep # | GEO Accession | File URL suffix                                                     |
|-----------------|-------|---------------|---------------------------------------------------------------------|
| E14-day0        | 1     | GSM881355     | [prefix_1]GSM881355/supp1/GSM881355_E14_RNA.bam.gz                  |
| E14-day4        | 1     | GSM881364     | [prefix_1]GSM881364/supp1/GSM881364_E14_RNA_d4.bam.gz               |
| E14-day6        | 1     | GSM881373     | [prefix_1]GSM881373/supp1/GSM881373_E14_RNA_d6.bam.gz               |
| Heart (8 wks/o) | 1     | GSM929707     | [prefix_2]wgEncodeLicrRnaSeqHeartCellPapMAdult8wksC57b16A1nRep1.bam |
| Heart (8 wks/o) | 2     | GSM929707     | [prefix_2]wgEncodeLicrRnaSeqHeartCellPapMAdult8wksC57b16A1nRep2.bam |
| Liver (8 wks/o) | 1     | GSM929711     | [prefix_2]wgEncodeLicrRnaSeqLiverCellPapMAdult8wksC57b16A1nRep1.bam |
| Liver (8 wks/o) | 2     | GSM929711     | [prefix_2]wgEncodeLicrRnaSeqLiverCellPapMAdult8wksC57b16A1nRep2.bam |

1554

1555 ***Drosophila melanogaster* source data of ChIP-seq on histone H3  
1556 modifications (SRA files) [69, 71]**

1557 For downloading, the URL must be constructed by adding the following prefix to each file listed:

- 1558  
1559 <ftp://ftp-trace.ncbi.nlm.nih.gov/sra/sra-instant/reads/ByRun/sra/SRR/SRR030/>

| Developmental time point/period | Antibody | GEO Accession | File URL suffix         |
|---------------------------------|----------|---------------|-------------------------|
| 0-4h embryos                    | H3K27ac  | GSM401407     | SRR030295/SRR030295.sra |
| 0-4h embryos                    | H3K27me3 | GSM439448     | SRR030360/SRR030360.sra |
| 0-4h embryos                    | H3K4me1  | GSM401409     | SRR030297/SRR030297.sra |
| 0-4h embryos                    | H3K4me3  | GSM400656     | SRR030269/SRR030269.sra |
| 0-4h embryos                    | H3K9ac   | GSM401408     | SRR030296/SRR030296.sra |
| 0-4h embryos                    | H3K9me3  | GSM439457     | SRR030369/SRR030369.sra |
| 0-4h embryos                    | Input    | GSM400657     | SRR030270/SRR030270.sra |
| 4-8h embryos                    | H3K27ac  | GSM401404     | SRR030292/SRR030292.sra |

Continued on next page



*Continued from previous page*

| <b>Developmental time point/period</b> | <b>Antibody</b> | <b>GEO Accession</b> | <b>File URL suffix</b>  |
|----------------------------------------|-----------------|----------------------|-------------------------|
| 4-8h embryos                           | H3K27me3        | GSM439447            | SRR030359/SRR030359.sra |
| 4-8h embryos                           | H3K4me1         | GSM401406            | SRR030294/SRR030294.sra |
| 4-8h embryos                           | H3K4me3         | GSM400674            | SRR030287/SRR030287.sra |
| 4-8h embryos                           | H3K9ac          | GSM401405            | SRR030293/SRR030293.sra |
| 4-8h embryos                           | H3K9me3         | GSM439456            | SRR030368/SRR030368.sra |
| 4-8h embryos                           | Input           | GSM400675            | SRR030288/SRR030288.sra |
| 8-12h embryos                          | H3K27ac         | GSM432583            | SRR030332/SRR030332.sra |
| 8-12h embryos                          | H3K27me3        | GSM439446            | SRR030358/SRR030358.sra |
| 8-12h embryos                          | H3K4me1         | GSM432593            | SRR030342/SRR030342.sra |
| 8-12h embryos                          | H3K4me3         | GSM432585            | SRR030334/SRR030334.sra |
| 8-12h embryos                          | H3K9ac          | GSM432592            | SRR030341/SRR030341.sra |
| 8-12h embryos                          | H3K9me3         | GSM439455            | SRR030367/SRR030367.sra |
| 8-12h embryos                          | Input           | GSM432636            | SRR030346/SRR030346.sra |
| 12-16h embryos                         | H3K27ac         | GSM432582            | SRR030331/SRR030331.sra |
| 12-16h embryos                         | H3K27me3        | GSM439445            | SRR030357/SRR030357.sra |
| 12-16h embryos                         | H3K4me1         | GSM432591            | SRR030340/SRR030340.sra |
| 12-16h embryos                         | H3K4me3         | GSM432580            | SRR030329/SRR030329.sra |
| 12-16h embryos                         | H3K9ac          | GSM439458            | SRR030370/SRR030370.sra |
| 12-16h embryos                         | H3K9me3         | GSM439454            | SRR030366/SRR030366.sra |
| 12-16h embryos                         | Input           | GSM432634            | SRR030344/SRR030344.sra |
| 16-20h embryos                         | H3K27ac         | GSM401401            | SRR030289/SRR030289.sra |
| 16-20h embryos                         | H3K27me3        | GSM439444            | SRR030356/SRR030356.sra |
| 16-20h embryos                         | H3K4me1         | GSM401403            | SRR030291/SRR030291.sra |
| 16-20h embryos                         | H3K4me3         | GSM400658            | SRR030271/SRR030271.sra |
| 16-20h embryos                         | H3K9ac          | GSM401402            | SRR030290/SRR030290.sra |
| 16-20h embryos                         | H3K9me3         | GSM439453            | SRR030365/SRR030365.sra |
| 16-20h embryos                         | Input           | GSM400659            | SRR030272/SRR030272.sra |
| 20-24h embryos                         | H3K27ac         | GSM401423            | SRR030311/SRR030311.sra |
| 20-24h embryos                         | H3K27me3        | GSM439443            | SRR030355/SRR030355.sra |
| 20-24h embryos                         | H3K4me1         | GSM439464            | SRR030376/SRR030376.sra |
| 20-24h embryos                         | H3K4me3         | GSM400672            | SRR030285/SRR030285.sra |
| 20-24h embryos                         | H3K9ac          | GSM401424            | SRR030312/SRR030312.sra |
| 20-24h embryos                         | H3K9me3         | GSM439452            | SRR030364/SRR030364.sra |
| 20-24h embryos                         | Input           | GSM400673            | SRR030286/SRR030286.sra |
| L1 larvae                              | H3K27ac         | GSM432581            | SRR030330/SRR030330.sra |
| L1 larvae                              | H3K27me3        | GSM439442            | SRR030354/SRR030354.sra |
| L1 larvae                              | H3K4me1         | GSM432588            | SRR030337/SRR030337.sra |
| L1 larvae                              | H3K4me3         | GSM400662            | SRR030275/SRR030275.sra |
| L1 larvae                              | H3K9ac          | GSM401422            | SRR030310/SRR030310.sra |
| L1 larvae                              | H3K9me3         | GSM439451            | SRR030363/SRR030363.sra |
| L1 larvae                              | Input           | GSM400663            | SRR030276/SRR030276.sra |
| L2 larvae                              | H3K27ac         | GSM401419            | SRR030307/SRR030307.sra |
| L2 larvae                              | H3K27me3        | GSM439441            | SRR030353/SRR030353.sra |
| L2 larvae                              | H3K4me1         | GSM401421            | SRR030309/SRR030309.sra |
| L2 larvae                              | H3K4me3         | GSM400668            | SRR030281/SRR030281.sra |
| L2 larvae                              | H3K9ac          | GSM401420            | SRR030308/SRR030308.sra |
| L2 larvae                              | H3K9me3         | GSM439450            | SRR030362/SRR030362.sra |
| L2 larvae                              | Input           | GSM400669            | SRR030282/SRR030282.sra |
| Pupae                                  | H3K27ac         | GSM401413            | SRR030301/SRR030301.sra |
| Pupae                                  | H3K27me3        | GSM439439            | SRR030351/SRR030351.sra |
| Pupae                                  | H3K4me1         | GSM401415            | SRR030303/SRR030303.sra |

*Continued on next page*

*Continued from previous page*

| <b>Developmental time point/period</b> | <b>Antibody</b> | <b>GEO Accession</b> | <b>File URL suffix</b>  |
|----------------------------------------|-----------------|----------------------|-------------------------|
| Pupae                                  | H3K4me3         | GSM400664            | SRR030277/SRR030277.sra |
| Pupae                                  | H3K9ac          | GSM401414            | SRR030302/SRR030302.sra |
| Pupae                                  | H3K9me3         | GSM439449            | SRR030361/SRR030361.sra |
| Pupae                                  | Input           | GSM400665            | SRR030278/SRR030278.sra |

1560

1561 ***Drosophila melanogaster* source data of RNA-seq (SAM files) [69, 71]**

1562 For downloading, the URL must be constructed by adding the following prefix to each file listed:

1563

1564 `ftp://data.modencode.org/all_files/dmel-signal-1/`

| <b>Developmental time point/period</b> | <b>GEO Accession</b> | <b>File URL suffix</b>          |
|----------------------------------------|----------------------|---------------------------------|
| 0-4h embryos                           | GSM451806            | 2010_0-4_accepted_hits.sam.gz   |
| 4-8h embryos                           | GSM451809            | 2019_4-8_accepted_hits.sam.gz   |
| 8-12h embryos                          | GSM451808            | 2020_8-12_accepted_hits.sam.gz  |
| 12-16h embryos                         | GSM451803            | 2021_12-16_accepted_hits.sam.gz |
| 16-20h embryos                         | GSM451807            | 2022_16-20_accepted_hits.sam.gz |
| 20-24h embryos                         | GSM451810            | 2023_20-24_accepted_hits.sam.gz |
| L1 larvae                              | GSM451811            | 2024_L1_accepted_hits.sam.gz    |
| L2 larvae                              | GSM453867            | 2025_L2_accepted_hits.sam.gz    |
| Pupae                                  | GSM451813            | 2030_Pupae_accepted_hits.sam.gz |

1565
